# Supplementary material for: Synthesis and characterization of rare-earth metallate amido complexes bearing the 2-amidate-functionalized indolyl ligand and their application in the hydroboration of esters with pinacolborane
Source: Royal Society of Chemistry journal article supplement (doi:10.1039/d1dt03384k), 2022-01-01
Supplement: d1dt03384k1.pdf [file d1dt03384k1.pdf]

Electronic supplementary information for

**Synthesis and characterization of rare-earth metallate amido complexes bearing 2-amidate-functionalized indolyl ligand and their application in the hydroboration of esters with pinacolborane**

Yun Wei,<sup>\*†</sup> Qin Bao,<sup>†</sup> Lulu Song,<sup>†</sup> Dongjing Hong,<sup>†</sup> Jianjian Gao,<sup>†</sup> Shaowu Wang,<sup>\*†‡§</sup> Xiancui Zhu,<sup>†</sup> Shuangliu Zhou,<sup>†</sup> Xiaolong Mu<sup>†</sup>

<sup>†</sup>Key Laboratory of Functional Molecular Solids, Ministry of Education, Anhui Laboratory of Molecule-Based Materials, School of Chemistry and Materials Science, Anhui Normal University, Wuhu, Anhui 241002, P. R. China,

<sup>‡</sup>Anhui Laboratory of Clean Catalytic Engineering, Anhui Laboratory of Functional Coordinated Complexes for Materials Chemistry and Application, College of Biological and Chemical Engineering, Anhui Polytechnic University, Wuhu, Anhui 241000, P. R. China

<sup>§</sup> State Key Laboratory of Organometallic Chemistry, Shanghai Institute of Organic Chemistry, Chinese Academy of Sciences, Shanghai 200032, P. R. China

**Table S1.** Summary of crystal and refinement data for complexes **1a-1d**.

|                                                    | <b>1a</b> (Y)                                                                                         | <b>1b</b> (Nd)                                                                                         | <b>1c</b> (Sm)                                                                                        | <b>1d</b> (Gd)                                                                                        |
|----------------------------------------------------|-------------------------------------------------------------------------------------------------------|--------------------------------------------------------------------------------------------------------|-------------------------------------------------------------------------------------------------------|-------------------------------------------------------------------------------------------------------|
| Formula                                            | C <sub>97</sub> H <sub>152</sub> ClY <sub>3</sub> Li<br>N <sub>9</sub> O <sub>7</sub> Si <sub>6</sub> | C <sub>97</sub> H <sub>152</sub> ClNd <sub>3</sub> Li<br>N <sub>9</sub> O <sub>7</sub> Si <sub>6</sub> | C <sub>97</sub> H <sub>152</sub> ClSm <sub>3</sub> LiN <sub>9</sub><br>O <sub>7</sub> Si <sub>6</sub> | C <sub>97</sub> H <sub>152</sub> ClGd <sub>3</sub> LiN <sub>9</sub><br>O <sub>7</sub> Si <sub>6</sub> |
| FW                                                 | 2033.93                                                                                               | 2199.92                                                                                                | 2218.25                                                                                               | 2238.95                                                                                               |
| T(K)                                               | 298.15                                                                                                | 298.15                                                                                                 | 298.15                                                                                                | 298.15                                                                                                |
| $\lambda$ (Å)                                      | 0.71073                                                                                               | 0.71073                                                                                                | 0.71073                                                                                               | 0.71073                                                                                               |
| Crystal system                                     | triclinic                                                                                             | triclinic                                                                                              | triclinic                                                                                             | triclinic                                                                                             |
| Space group                                        | <i>P</i> $\bar{1}$                                                                                    | <i>P</i> $\bar{1}$                                                                                     | <i>P</i> $\bar{1}$                                                                                    | <i>P</i> $\bar{1}$                                                                                    |
| a(Å)                                               | 19.816(2)                                                                                             | 19.8695(14)                                                                                            | 19.8895(16)                                                                                           | 19.8493(16)                                                                                           |
| b(Å)                                               | 20.172(2)                                                                                             | 20.1675(14)                                                                                            | 20.3112(17)                                                                                           | 20.2615(17)                                                                                           |
| c(Å)                                               | 21.517(2)                                                                                             | 21.5072(15)                                                                                            | 21.6747(18)                                                                                           | 21.6207(18)                                                                                           |
| $\alpha$ (deg)                                     | 67.6430(10)                                                                                           | 68.2219(10)                                                                                            | 67.0740(10)                                                                                           | 67.2240(10)                                                                                           |
| $\beta$ (deg)                                      | 83.979(2)                                                                                             | 84.2175(10)                                                                                            | 83.8230(10)                                                                                           | 83.7930(10)                                                                                           |
| $\gamma$ (deg)                                     | 61.6610(10)                                                                                           | 61.4812(9)                                                                                             | 61.8000(10)                                                                                           | 61.7530(10)                                                                                           |
| v(Å <sup>3</sup> )                                 | 6970.8(12)                                                                                            | 7001.2(9)                                                                                              | 7075.6(10)                                                                                            | 7032.3(10)                                                                                            |
| Z                                                  | 2                                                                                                     | 2                                                                                                      | 2                                                                                                     | 2                                                                                                     |
| D <sub>calcd</sub> (mg/m <sup>3</sup> )            | 0.969                                                                                                 | 1.044                                                                                                  | 1.041                                                                                                 | 1.057                                                                                                 |
| $\mu$ (mm <sup>-1</sup> )                          | 1.350                                                                                                 | 1.207                                                                                                  | 1.339                                                                                                 | 1.509                                                                                                 |
| F(000)                                             | 2148                                                                                                  | 2274                                                                                                   | 2286                                                                                                  | 2298                                                                                                  |
| $\theta$ range(deg)                                | 1.028-27.816                                                                                          | 1.024-25.000                                                                                           | 1.025-27.476                                                                                          | 1.026-27.551                                                                                          |
| Reflections<br>collected/unique                    | 81971/31977                                                                                           | 69464/24635                                                                                            | 83569/31916                                                                                           | 83693/31936                                                                                           |
| R(int)                                             | 0.0984                                                                                                | 0.1055                                                                                                 | 0.0642                                                                                                | 0.1177                                                                                                |
| Goodness-of-fit<br>on $F^2$                        | 0.956                                                                                                 | 0.963                                                                                                  | 0.995                                                                                                 | 0.938                                                                                                 |
| $R_1, wR_2 [I > 2\sigma(I)]$                       | 0.0774, 0.1811                                                                                        | 0.0705, 0.1612                                                                                         | 0.0587, 0.1378                                                                                        | 0.0701, 0.1509                                                                                        |
| $R_1, wR_2$ (all data)                             | 0.1939, 0.2275                                                                                        | 0.1627, 0.2029                                                                                         | 0.1265, 0.1675                                                                                        | 0.1749, 0.1922                                                                                        |
| Largest diff.peak<br>and hole(e. Å <sup>-3</sup> ) | 0.784 and -<br>0.505                                                                                  | 1.012 and -<br>0.502                                                                                   | 2.063 and -0.642                                                                                      | 1.407 and -0.523                                                                                      |

**Table S2.** Summary of crystal and refinement data for complexes **1e-1g**.

|                                                                                     | <b>1e</b> (Dy)                                                                                     | <b>1f</b> (Er)                                                                                     | <b>1g</b> (Yb)                                                                                     |
|-------------------------------------------------------------------------------------|----------------------------------------------------------------------------------------------------|----------------------------------------------------------------------------------------------------|----------------------------------------------------------------------------------------------------|
| Formula                                                                             | C <sub>97</sub> H <sub>152</sub> ClDy <sub>3</sub> LiN <sub>9</sub> O <sub>7</sub> Si <sub>6</sub> | C <sub>97</sub> H <sub>152</sub> ClEr <sub>3</sub> LiN <sub>9</sub> O <sub>7</sub> Si <sub>6</sub> | C <sub>97</sub> H <sub>152</sub> ClYb <sub>3</sub> LiN <sub>9</sub> O <sub>7</sub> Si <sub>6</sub> |
| FW                                                                                  | 2254.70                                                                                            | 2268.98                                                                                            | 2286.32                                                                                            |
| <i>T</i> (K)                                                                        | 298.15                                                                                             | 298.15                                                                                             | 298.15                                                                                             |
| $\lambda$ (Å)                                                                       | 0.71073                                                                                            | 0.71073                                                                                            | 0.71073                                                                                            |
| Crystal system                                                                      | triclinic                                                                                          | triclinic                                                                                          | triclinic                                                                                          |
| Space group                                                                         | <i>P</i> $\bar{1}$                                                                                 | <i>P</i> $\bar{1}$                                                                                 | <i>P</i> $\bar{1}$                                                                                 |
| <i>a</i> (Å)                                                                        | 19.827(3)                                                                                          | 19.7581(15)                                                                                        | 19.7356(17)                                                                                        |
| <i>b</i> (Å)                                                                        | 20.177(3)                                                                                          | 20.0890(15)                                                                                        | 20.0788(18)                                                                                        |
| <i>c</i> (Å)                                                                        | 21.529(3)                                                                                          | 21.4239(16)                                                                                        | 21.4057(19)                                                                                        |
| $\alpha$ (deg)                                                                      | 67.638(2)                                                                                          | 67.9980(10)                                                                                        | 68.0020(10)                                                                                        |
| $\beta$ (deg)                                                                       | 83.935(2)                                                                                          | 84.0600(10)                                                                                        | 84.0650(10)                                                                                        |
| $\gamma$ (deg)                                                                      | 61.667(2)                                                                                          | 61.6270(10)                                                                                        | 61.6860(10)                                                                                        |
| <i>v</i> (Å <sup>3</sup> )                                                          | 6981.1(18)                                                                                         | 6908.1(9)                                                                                          | 6895.2(11)                                                                                         |
| <i>Z</i>                                                                            | 2                                                                                                  | 2                                                                                                  | 2                                                                                                  |
| D <sub>calcd</sub> (mg/m <sup>3</sup> )                                             | 1.073                                                                                              | 1.091                                                                                              | 1.101                                                                                              |
| $\mu$ (mm <sup>-1</sup> )                                                           | 1.700                                                                                              | 1.918                                                                                              | 2.131                                                                                              |
| F(000)                                                                              | 2310                                                                                               | 2322                                                                                               | 2334                                                                                               |
| $\theta$ range(deg)                                                                 | 1.027- 27.565                                                                                      | 1.029-27.475                                                                                       | 1.030-27.437                                                                                       |
| Reflections collected/unique                                                        | 81915/ 31769                                                                                       | 81890/31261                                                                                        | 81666/31109                                                                                        |
| R(int)                                                                              | 0.0905                                                                                             | 0.0773                                                                                             | 0.0749                                                                                             |
| Goodness-of-fit on <i>F</i> <sup>2</sup>                                            | 1.017                                                                                              | 1.007                                                                                              | 1.022                                                                                              |
| <i>R</i> <sub>1</sub> , <i>wR</i> <sub>2</sub> [ <i>I</i> >2 $\sigma$ ( <i>I</i> )] | 0.0787, 0.1770                                                                                     | 0.0641, 0.1405                                                                                     | 0.0687, 0.1591                                                                                     |
| <i>R</i> <sub>1</sub> , <i>wR</i> <sub>2</sub> (all data)                           | 0.1751, 0.2199                                                                                     | 0.1425, 0.1763                                                                                     | 0.1491, 0.1959                                                                                     |
| Largest diff.peak and hole(e. Å <sup>-3</sup> )                                     | 2.804 and -1.036                                                                                   | 2.851 and -0.982                                                                                   | 2.827 and -0.980                                                                                   |

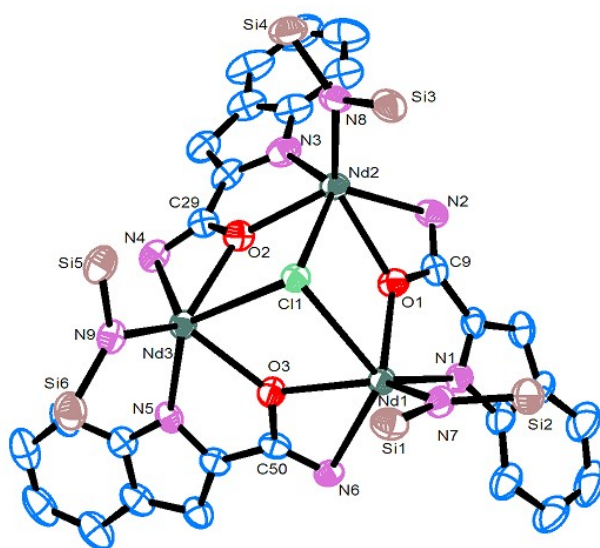

**Figure S1.** Molecular structure of complex **1b** with the probability ellipsoids drawn at the 25% level. Hydrogen atoms, 2,6-diisopropylphenyl groups on the N2, N4, N6 atoms, methyl groups on the Si atoms, and  $\text{Li}(\text{THF})_4^+$  are omitted for clarity.

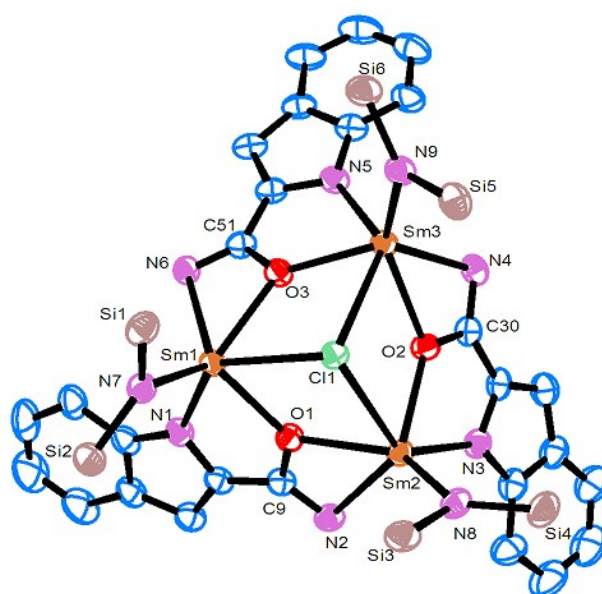

**Figure S2.** Molecular structure of complex **1c** with the probability ellipsoids drawn at the 25% level. Hydrogen atoms, 2,6-diisopropylphenyl groups on the N2, N4, N6 atoms, methyl groups on the Si atoms, and  $\text{Li}(\text{THF})_4^+$  are omitted for clarity.

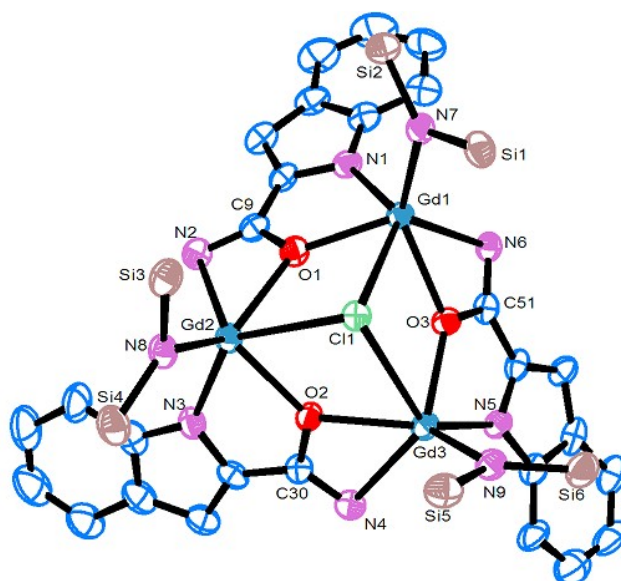

**Figure S3.** Molecular structure of complex **1d** with the probability ellipsoids drawn at the 25% level. Hydrogen atoms, 2,6-diisopropylphenyl groups on the N2, N4, N6 atoms, methyl groups on the Si atoms, and  $\text{Li}(\text{THF})_4^+$  are omitted for clarity.

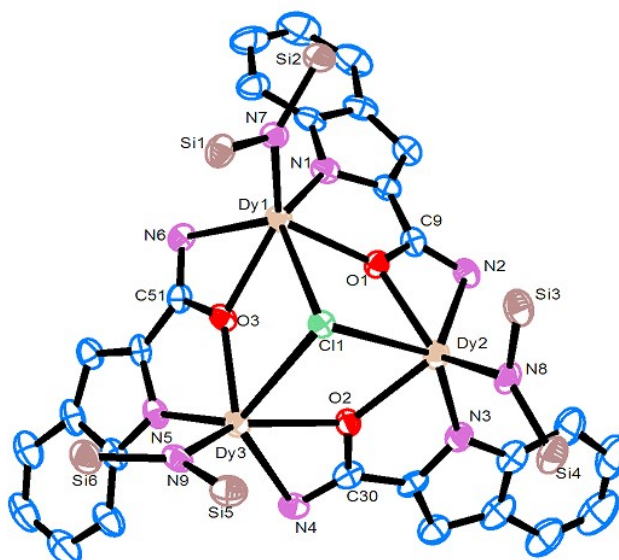

**Figure S4.** Molecular structure of complex **1e** with the probability ellipsoids drawn at the 25% level. Hydrogen atoms, 2,6-diisopropylphenyl groups on the N2, N4, N6 atoms, methyl groups on the Si atoms, and  $\text{Li}(\text{THF})_4^+$  are omitted for clarity.

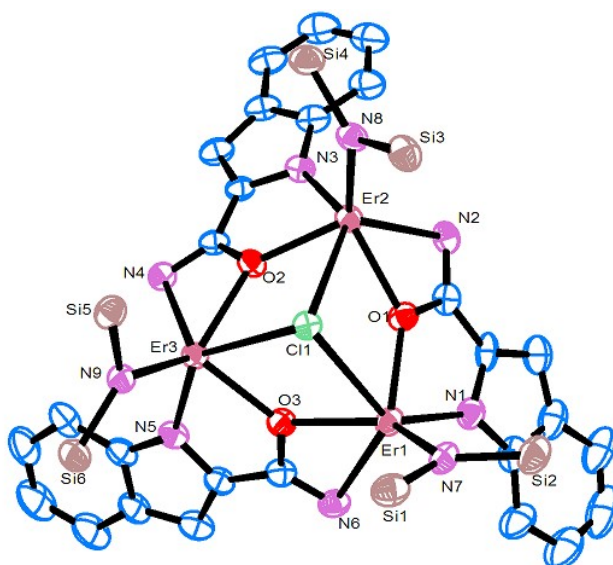

**Figure S5.** Molecular structure of complex **1f** with the probability ellipsoids drawn at the 25% level. Hydrogen atoms, 2,6-diisopropylphenyl groups on the N2, N4, N6 atoms, methyl groups on the Si atoms, and  $\text{Li}(\text{THF})_4^+$  are omitted for clarity.

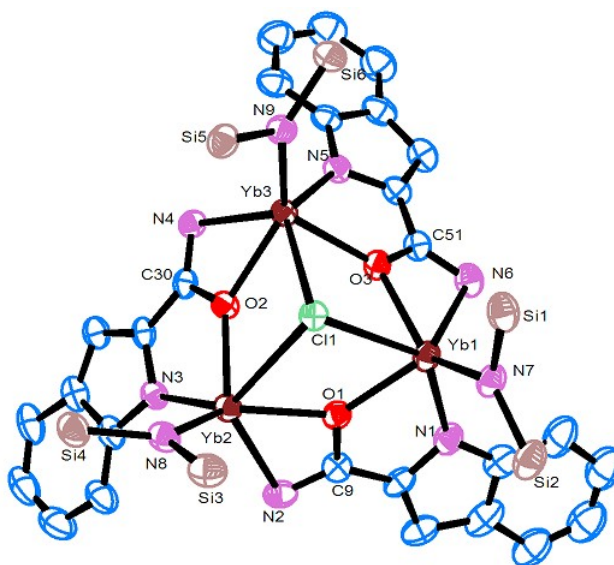

**Figure S6.** Molecular structure of complex **1g** with the probability ellipsoids drawn at the 25% level. Hydrogen atoms, 2,6-diisopropylphenyl groups on the N2, N4, N6 atoms, methyl groups on the Si atoms, and  $\text{Li}(\text{THF})_4^+$  are omitted for clarity.

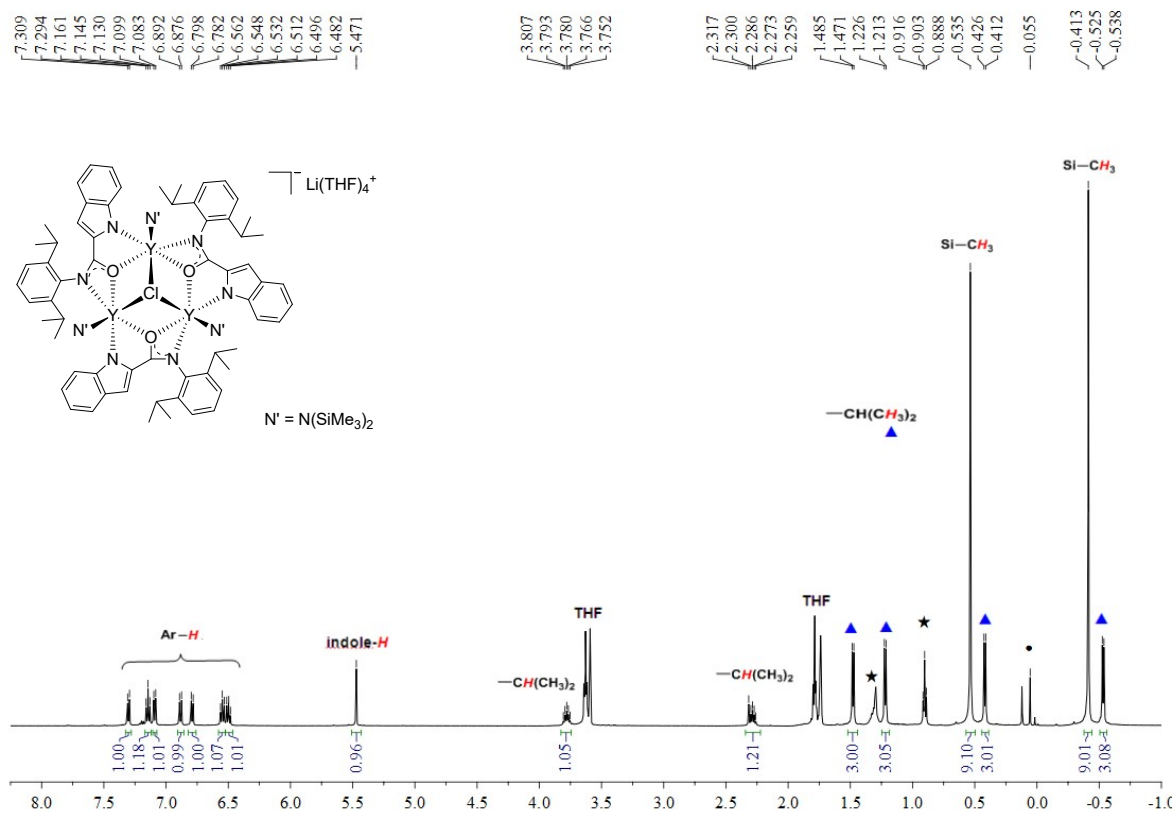

**Figure S7.**  $^1\text{H}$  NMR spectrum (500 MHz,  $\text{THF}-d_8$ , 298 K) of complex **1a** (★ *n*-hexane, ●  $\text{HNSiMe}_3$ ).

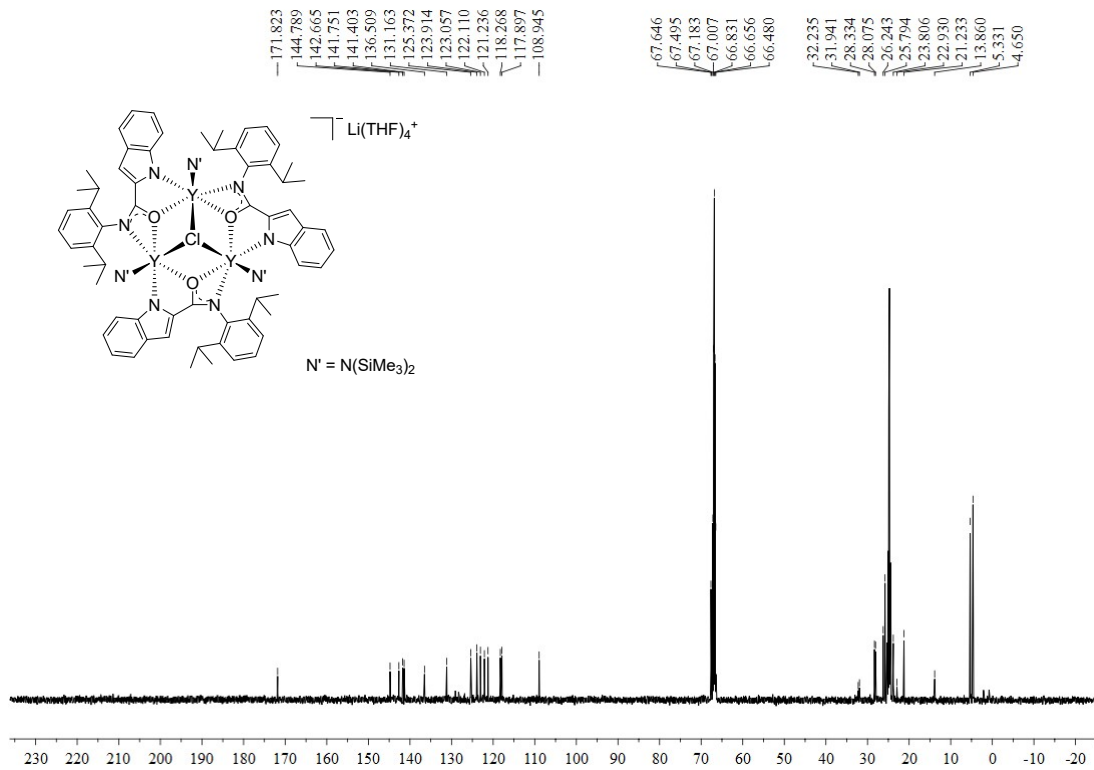

**Figure S8.**  $^{13}\text{C}$  NMR spectrum (125 MHz,  $\text{THF}-d_8$ , 298 K) of complex **1a**.

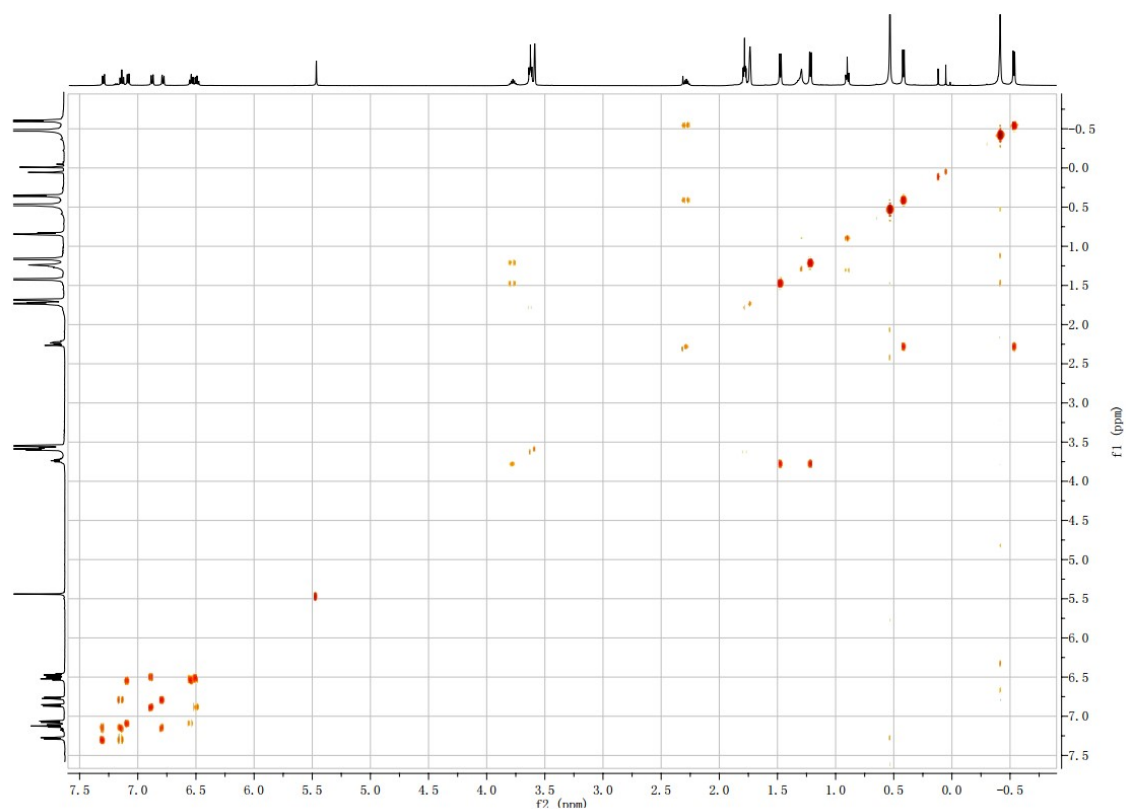

**Figure S9.** 2D NMR COSY spectrum (500 MHz, THF-*d*<sub>8</sub>, 298 K) of complex **1a**.

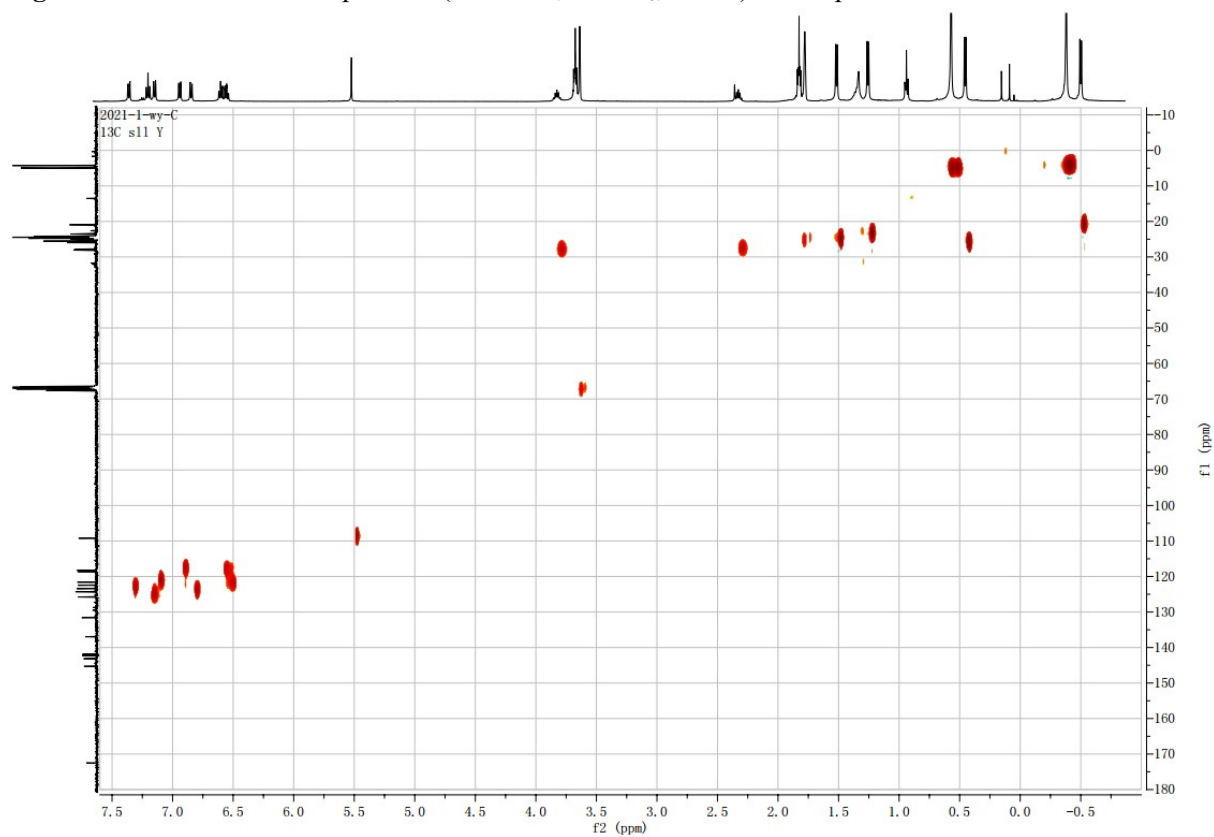

**Figure S10.** 2D NMR HSQC spectrum (500 MHz, THF-*d*<sub>8</sub>, 298 K) of complex **1a**.



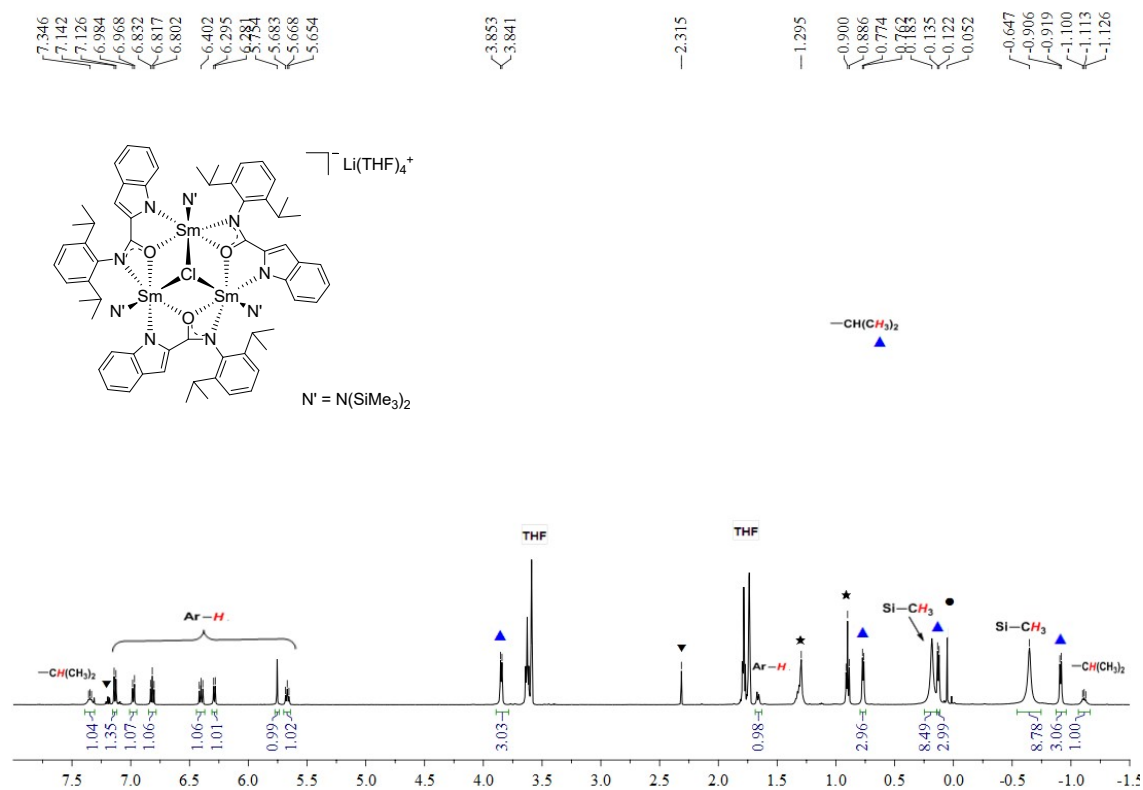

**Figure S11.**  $^1\text{H}$  NMR spectrum (500 MHz,  $\text{THF-}d_8$ , 298 K) of complex **1c** ( $\blacktriangledown$  toluene,  $\star$  *n*-hexane,  $\bullet$   $\text{HNSiMe}_3$ ).

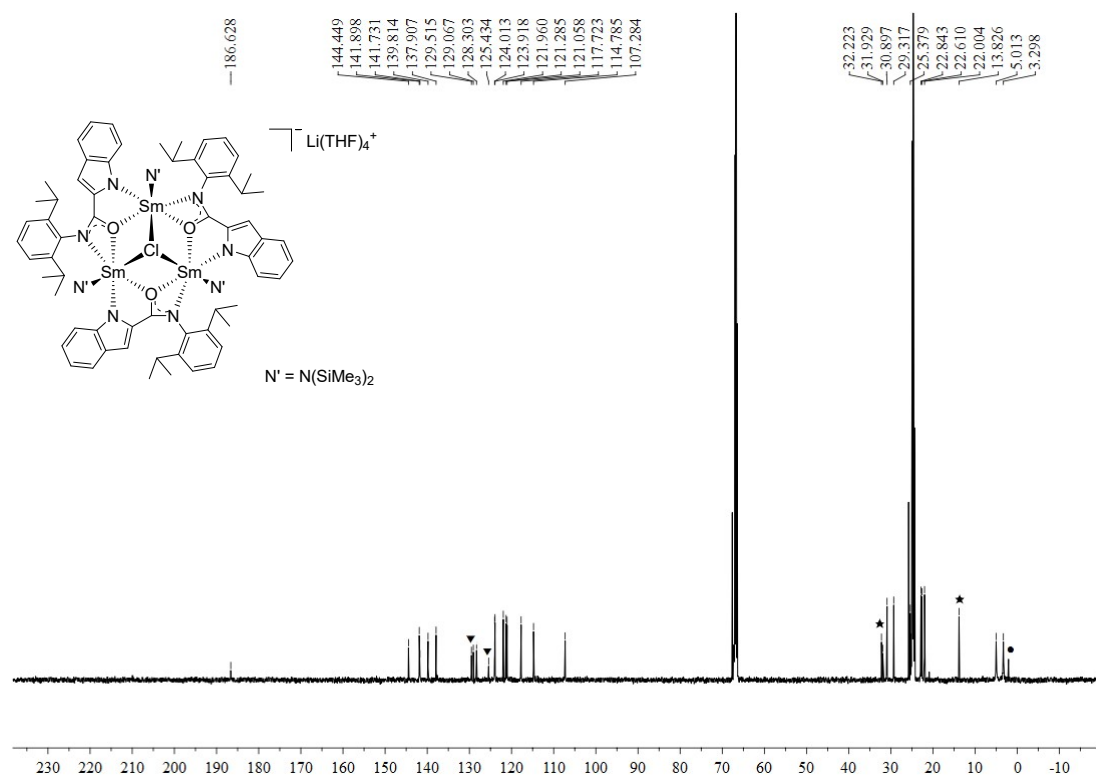

**Figure S12.**  $^{13}\text{C}$  NMR spectrum (125 MHz,  $\text{THF-}d_8$ , 298 K) of complex **1c** ( $\blacktriangledown$  toluene,  $\star$  *n*-hexane,  $\bullet$   $\text{HNSiMe}_3$ ).

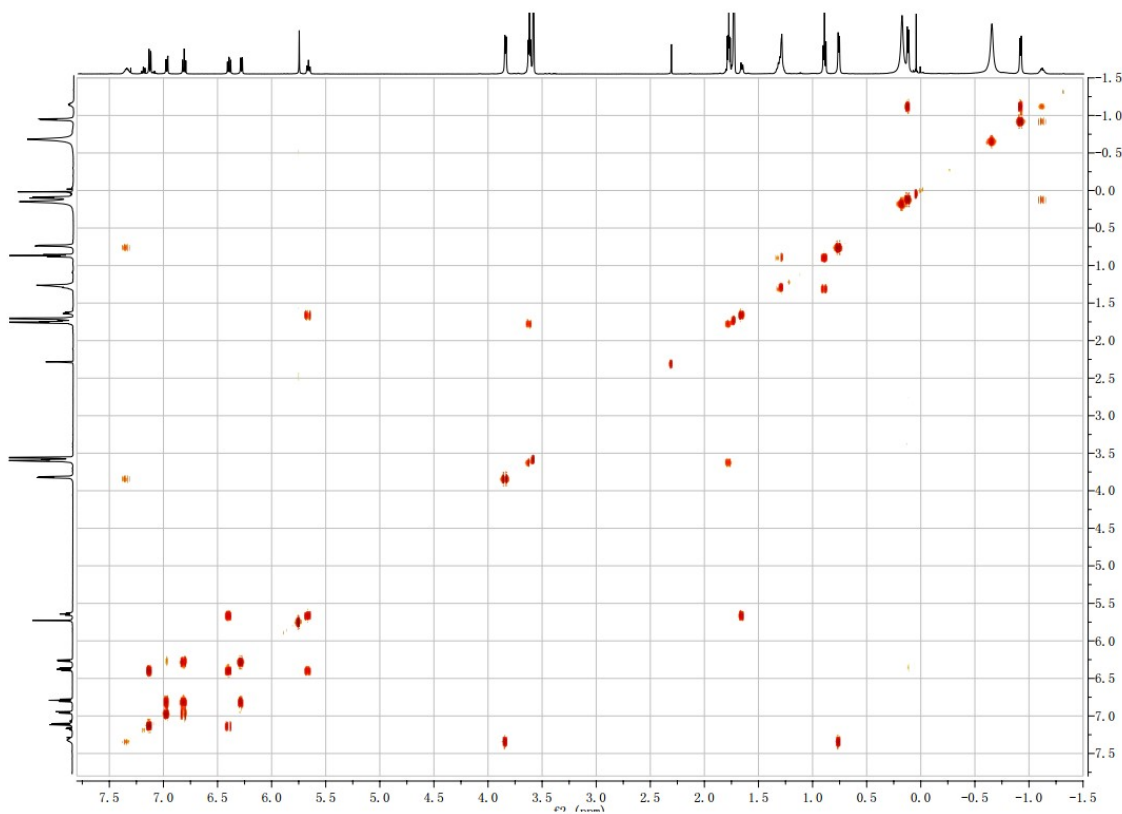

**Figure S13.** 2D NMR COSY spectrum (500 MHz, THF- $d_8$ , 298 K) of complex **1c**.

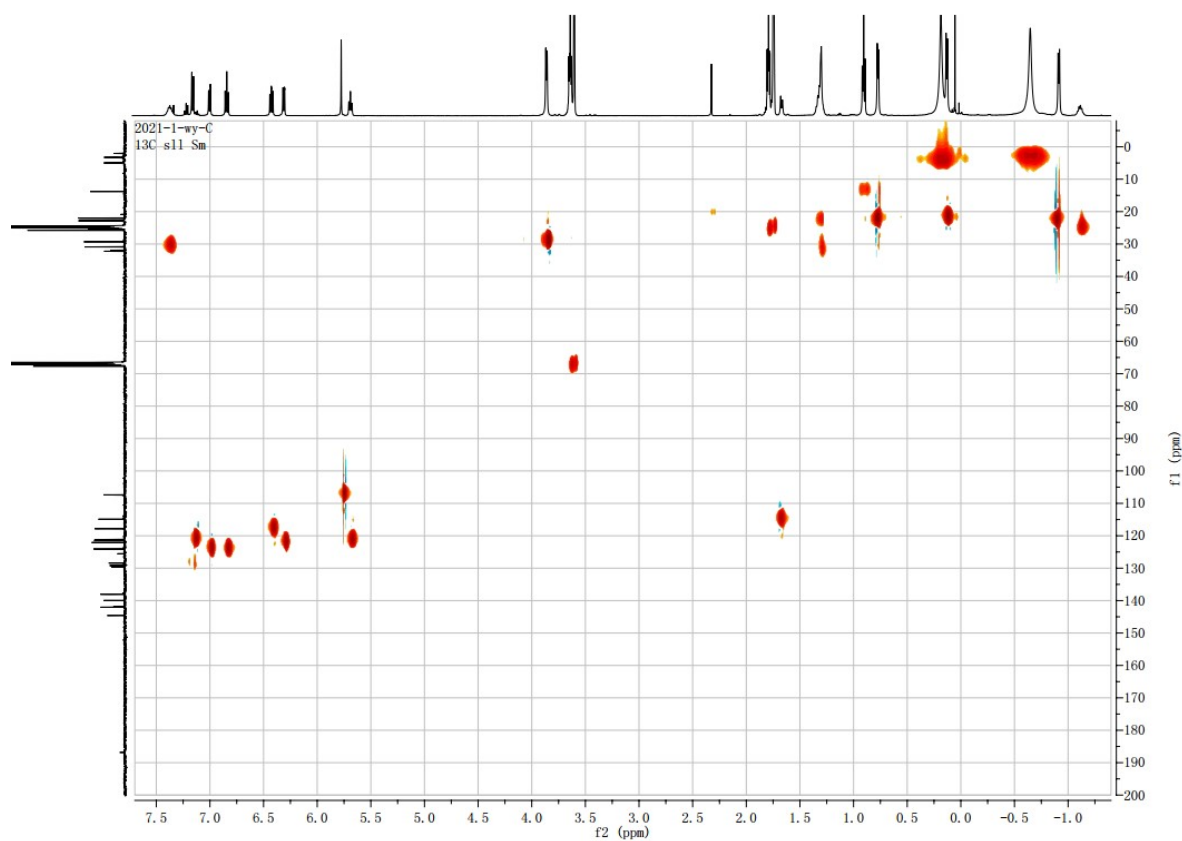

**Figure S14.** 2D NMR HSQC spectrum (500 MHz, THF- $d_8$ , 298 K) of complex **1c**.

## Characterization of ester hydroboration products

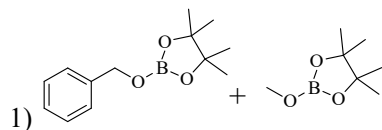

$^1\text{H}$  NMR (500 MHz,  $\text{C}_6\text{D}_6$ , 298 K):  $\delta$  7.32 (d, 2H,  $J = 10.00$  Hz,  $\text{PhCH}_2\text{OBpin}$ ), 7.13-7.04 (m, 3H,  $\text{PhCH}_2\text{OBpin}$ ), 4.96 (s, 2H,  $\text{PhCH}_2\text{OBpin}$ ), 3.51 (s, 3H,  $\text{CH}_3\text{OBpin}$ ).  $^{13}\text{C}$  NMR (125 MHz,  $\text{C}_6\text{D}_6$ , 298 K):  $\delta$  140.1, 128.6, 127.6, 127.1, 82.7, 67.0, 52.4, 24.7. The methyl peaks of -OBpin in  $^1\text{H}$  NMR are overlapping in the region 0.99-1.06 ppm.  $^{11}\text{B}$  NMR (160 MHz,  $\text{C}_6\text{D}_6$ , 298 K):  $\delta$  22.7 ( $\text{PhCH}_2\text{OBpin}/\text{MeOBpin}$ ).

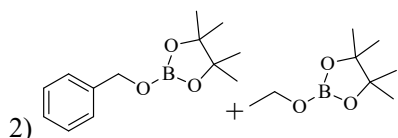

$^1\text{H}$  NMR (500 MHz,  $\text{C}_6\text{D}_6$ , 298 K):  $\delta$  7.32 (d, 2H,  $J = 10.00$  Hz,  $\text{PhCH}_2\text{OBpin}$ ), 7.13-7.04 (m, 3H,  $\text{PhCH}_2\text{OBpin}$ ), 4.96 (s, 2H,  $\text{PhCH}_2\text{OBpin}$ ), 3.92 (q, 2H,  $J = 5.00$  Hz,  $\text{CH}_3\text{CH}_2\text{OBpin}$ ), 1.11 (t, 3H,  $J = 10.00$ ,  $\text{CH}_3\text{CH}_2\text{OBpin}$ ).  $^{13}\text{C}$  NMR (125 MHz,  $\text{C}_6\text{D}_6$ , 298 K):  $\delta$  140.1, 128.6, 127.6, 127.1, 82.7, 67.0, 60.7, 24.7, 17.5. The methyl peaks of -OBpin in  $^1\text{H}$  NMR are overlapping in the region 1.02-1.07 ppm.  $^{11}\text{B}$  NMR (160 MHz,  $\text{C}_6\text{D}_6$ , 298 K):  $\delta$  22.6 ( $\text{PhCH}_2\text{OBpin}/\text{EtOBpin}$ ).

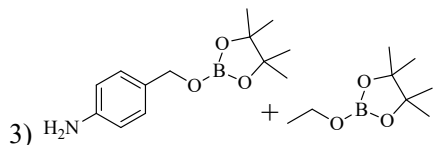

$^1\text{H}$  NMR (500 MHz,  $\text{C}_6\text{D}_6$ , 298 K):  $\delta$  7.27 (d, 2H,  $J = 10.00$  Hz,  $4\text{-NH}_2\text{PhCH}_2\text{OBpin}$ ), 7.04 (d, 2H,  $J = 5.00$  Hz,  $4\text{-NH}_2\text{PhCH}_2\text{OBpin}$ ), 4.90 (s, 2H,  $4\text{-NH}_2\text{PhCH}_2\text{OBpin}$ ), 3.92 (q, 2H,  $J = 5.00$  Hz,  $\text{CH}_3\text{CH}_2\text{OBpin}$ ), 1.11 (t, 3H,  $J = 10.00$ ,  $\text{CH}_3\text{CH}_2\text{OBpin}$ ).  $^{13}\text{C}$  NMR (125 MHz,  $\text{C}_6\text{D}_6$ , 298 K):  $\delta$  143.4, 131.7, 128.6, 117.9, 82.7, 67.0, 60.7, 24.7, 17.5. The methyl peaks of -OBpin in  $^1\text{H}$  NMR are overlapping in the region 1.02-1.09 ppm.  $^{11}\text{B}$  NMR (160 MHz,  $\text{C}_6\text{D}_6$ , 298 K):  $\delta$  24.2 ( $\text{NH}_2\text{PhCH}_2\text{OBpin}$ ), 22.6 ( $\text{EtOBpin}$ ).

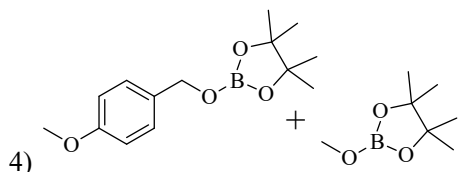

$^1\text{H}$  NMR (500 MHz,  $\text{C}_6\text{D}_6$ , 298 K):  $\delta$  7.28 (d, 2H,  $J = 10.00$  Hz,  $4\text{-CH}_3\text{ONH}_2\text{PhCH}_2\text{OBpin}$ ), 6.76 (d, 2H,  $J = 10.00$  Hz,  $4\text{-CH}_3\text{ONH}_2\text{PhCH}_2\text{OBpin}$ ), 4.96 (s, 2H,  $4\text{-CH}_3\text{ONH}_2\text{PhCH}_2\text{OBpin}$ ), 3.27 (s, 3H,  $4\text{-CH}_3\text{ONH}_2\text{PhCH}_2\text{OBpin}$ ), 3.51 (s, 3H,  $\text{CH}_3\text{OBpin}$ ).  $^{13}\text{C}$  NMR (125 MHz,  $\text{C}_6\text{D}_6$ , 298 K):  $\delta$  159.7, 132.2, 128.9, 114.1, 82.7, 66.8, 54.8, 52.4, 24.7. The methyl peaks of -OBpin in  $^1\text{H}$  NMR are overlapping in the region 0.99-1.05 ppm.  $^{11}\text{B}$  NMR (160 MHz,  $\text{C}_6\text{D}_6$ ): 22.7 ( $4\text{-MeOPhCH}_2\text{OBpin}/\text{MeOBpin}$ ).

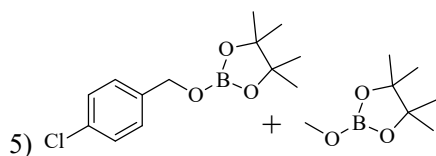

$^1\text{H}$  NMR (500 MHz,  $\text{C}_6\text{D}_6$ , 298 K):  $\delta$  7.06 (d, 2H,  $J = 10.00$  Hz, 4-ClPhCH<sub>2</sub>OBpin), 6.99 (d, 2H,  $J = 10.00$  Hz, 4-ClPhCH<sub>2</sub>OBpin), 4.76 (s, 2H, 4-ClPhCH<sub>2</sub>OBpin), 3.51 (s, 3H, CH<sub>3</sub>OBpin).  $^{13}\text{C}$  NMR (125 MHz,  $\text{C}_6\text{D}_6$ , 298 K):  $\delta$  138.4, 133.4, 128.7, 128.4, 82.9, 66.1, 52.4, 24.7. The methyl peaks of -OBpin in  $^1\text{H}$  NMR are overlapping in the region 1.03-1.04 ppm.  $^{11}\text{B}$  NMR (160 MHz,  $\text{C}_6\text{D}_6$ , 298 K):  $\delta$  22.7 (Cl-4-PhCH<sub>2</sub>OBpin/MeOBpin).

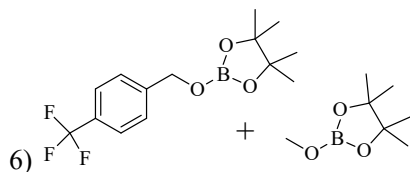

$^1\text{H}$  NMR (500 MHz,  $\text{C}_6\text{D}_6$ , 298 K):  $\delta$  7.29 (d, 2H,  $J = 5.00$  Hz, 4-CF<sub>3</sub>PhCH<sub>2</sub>OBpin), 7.07 (d, 2H,  $J = 10.00$  Hz, 4-CF<sub>3</sub>PhCH<sub>2</sub>OBpin), 4.79 (s, 2H, 4-CF<sub>3</sub>PhCH<sub>2</sub>OBpin), 3.51 (s, 3H, CH<sub>3</sub>OBpin).  $^{13}\text{C}$  NMR (125 MHz,  $\text{C}_6\text{D}_6$ , 298 K):  $\delta$  143.9, 129.8, 129.5, 125.5, 125.4, 83.0, 82.5, 66.0, 52.4, 24.7. The methyl peaks of -OBpin in  $^1\text{H}$  NMR are overlapping in the region 0.99-1.05 ppm.  $^{11}\text{B}$  NMR (160 MHz,  $\text{C}_6\text{D}_6$ , 298 K):  $\delta$  22.7 (CF<sub>3</sub>-4-PhCH<sub>2</sub>OBpin/MeOBpin).

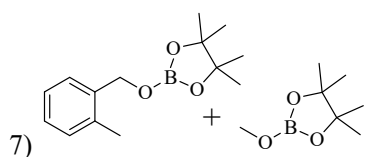

$^1\text{H}$  NMR (500 MHz,  $\text{C}_6\text{D}_6$ , 298 K):  $\delta$  7.56 (d, 1H,  $J = 5.00$  Hz, 2-CH<sub>3</sub>PhCH<sub>2</sub>OBpin), 7.09-7.05 (m, 2H, 2-CH<sub>3</sub>PhCH<sub>2</sub>OBpin), 6.95 (d, 1H,  $J = 10.00$  Hz, 2-CH<sub>3</sub>PhCH<sub>2</sub>OBpin), 4.98 (s, 2H, 2-CH<sub>3</sub>PhCH<sub>2</sub>OBpin), 3.51 (s, 3H, CH<sub>3</sub>OBpin), 2.07 (s, 3H, 2-CH<sub>3</sub>PhCH<sub>2</sub>OBpin).  $^{13}\text{C}$  NMR (125 MHz,  $\text{C}_6\text{D}_6$ , 298 K):  $\delta$  137.9, 135.8, 130.3, 127.7, 127.5, 126.2, 82.7, 82.5, 65.3, 52.4, 24.9, 18.6. The methyl peaks of -OBpin in  $^1\text{H}$  NMR are overlapping in the region 0.99-1.06 ppm.  $^{11}\text{B}$  NMR (160 MHz,  $\text{C}_6\text{D}_6$ , 298 K):  $\delta$  22.7 (CH<sub>3</sub>-2-PhCH<sub>2</sub>OBpin/MeOBpin).

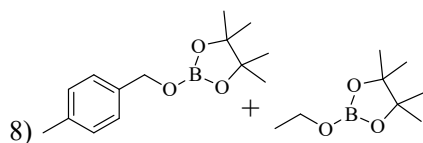

$^1\text{H}$  NMR (500 MHz,  $\text{C}_6\text{D}_6$ , 298 K):  $\delta$  7.28 (d, 2H,  $J = 10.00$  Hz, 4-CH<sub>3</sub>PhCH<sub>2</sub>OBpin), 6.97 (d, 2H,  $J = 10.00$  Hz, 4-CH<sub>3</sub>PhCH<sub>2</sub>OBpin), 4.99 (s, 2H, 4-CH<sub>3</sub>PhCH<sub>2</sub>OBpin), 3.93 (q, 2H,  $J = 5.00$ , CH<sub>3</sub>CH<sub>2</sub>OBpin), 2.08 (s, 3H, 4-CH<sub>3</sub>PhCH<sub>2</sub>OBpin), 1.12 (t, 3H,  $J = 10.00$ , CH<sub>3</sub>CH<sub>2</sub>OBpin).  $^{13}\text{C}$  NMR (125 MHz,  $\text{C}_6\text{D}_6$ , 298 K):  $\delta$  137.2, 137.0, 129.3, 127.3, 82.7, 66.9, 60.7, 24.9, 17.5. The methyl peaks of -OBpin in  $^1\text{H}$  NMR are overlapping in the region 0.99-1.05 ppm.  $^{11}\text{B}$  NMR (160 MHz,  $\text{C}_6\text{D}_6$ , 298 K):  $\delta$  22.6 (CH<sub>3</sub>-4-PhCH<sub>2</sub>OBpin/MeOBpin).

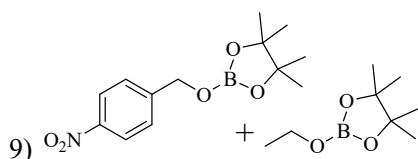

$^1\text{H}$  NMR (500 MHz,  $\text{C}_6\text{D}_6$ , 298 K):  $\delta$  7.78 (d, 2H,  $J = 10.00$  Hz, 4- $\text{NO}_2\text{PhCH}_2\text{OBpin}$ ), 6.89 (d, 2H,  $J = 5.00$  Hz, 4- $\text{NO}_2\text{PhCH}_2\text{OBpin}$ ), 4.68 (s, 2H, 4- $\text{NO}_2\text{PhCH}_2\text{OBpin}$ ), 3.92 (q, 2H,  $J = 10.00$ ,  $\text{CH}_3\text{CH}_2\text{OBpin}$ ), 1.12 (t, 3H,  $J = 10.00$  Hz,  $\text{CH}_3\text{CH}_2\text{OBpin}$ ).  $^{13}\text{C}$  NMR (125 MHz,  $\text{C}_6\text{D}_6$ , 298 K):  $\delta$  147.6, 146.5, 126.7, 123.6, 83.1, 82.4, 65.6, 60.7, 24.7, 17.5. The methyl peaks of -OBpin in  $^1\text{H}$  NMR are overlapping in the region 1.03-1.09 ppm.  $^{11}\text{B}$  NMR (160 MHz,  $\text{C}_6\text{D}_6$ , 298 K):  $\delta$  22.6 ( $\text{NO}_2$ -4- $\text{PhCH}_2\text{OBpin}/\text{EtOBpin}$ ).

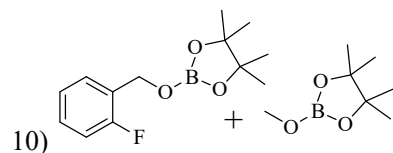

$^1\text{H}$  NMR (500 MHz,  $\text{C}_6\text{D}_6$ , 298 K):  $\delta$  7.43-7.46 (m, 1H, 2- $\text{FPhCH}_2\text{OBpin}$ ), 6.83-6.72 (m, 3H, 2- $\text{FPhCH}_2\text{OBpin}$ ), 5.11 (s, 2H, 2- $\text{FPhCH}_2\text{OBpin}$ ), 3.51 (s, 3H,  $\text{CH}_3\text{OBpin}$ ).  $^{13}\text{C}$  NMR (125 MHz,  $\text{C}_6\text{D}_6$ , 298 K):  $\delta$  161.6, 159.7, 129.2, 124.3, 115.3, 115.1, 82.9, 82.5, 61.0, 52.4, 24.9, 24.7. The methyl peaks of -OBpin in  $^1\text{H}$  NMR are overlapping in the region 0.99-1.04 ppm.  $^{11}\text{B}$  NMR (160 MHz,  $\text{C}_6\text{D}_6$ , 298 K):  $\delta$  22.7 (F-2- $\text{PhCH}_2\text{OBpin}/\text{MeOBpin}$ ).

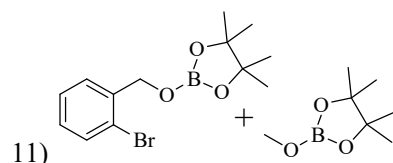

$^1\text{H}$  NMR (500 MHz,  $\text{C}_6\text{D}_6$ , 298 K):  $\delta$  7.58 (d, 1H,  $J = 10.00$  Hz, 2- $\text{BrPhCH}_2\text{OBpin}$ ), 7.56 (d, 1H,  $J = 10.00$  Hz, 2- $\text{BrPhCH}_2\text{OBpin}$ ), 6.93 (d, 1H,  $J = 10.00$  Hz, 2- $\text{BrPhCH}_2\text{OBpin}$ ), 6.66 (d, 1H,  $J = 5.00$  Hz, 2- $\text{BrPhCH}_2\text{OBpin}$ ), 5.14 (s, 2H, 2- $\text{BrPhCH}_2\text{OBpin}$ ), 3.51 (s, 3H,  $\text{CH}_3\text{OBpin}$ ).  $^{13}\text{C}$  NMR (125 MHz,  $\text{C}_6\text{D}_6$ , 298 K):  $\delta$  139.0, 132.5, 128.8, 127.6, 121.8, 83.0, 82.5, 66.6, 52.4, 24.9, 24.7. The methyl peaks of -OBpin in  $^1\text{H}$  NMR are overlapping in the region 1.01-1.04 ppm.  $^{11}\text{B}$  NMR (160 MHz,  $\text{C}_6\text{D}_6$ , 298 K):  $\delta$  22.7 (Br-2- $\text{PhCH}_2\text{OBpin}/\text{MeOBpin}$ ).

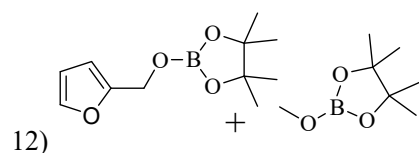

$^1\text{H}$  NMR (500 MHz,  $\text{C}_6\text{D}_6$ , 298 K):  $\delta$  7.04 (s, 1H, CH), 6.14 (d, 1H,  $J = 5.00$  Hz, CH), 6.01 (m, 1H, CH), 4.86 (s, 2H,  $\text{CH}_2$ ), 3.51 (s, 3H,  $\text{CH}_3\text{OBpin}$ ).  $^{13}\text{C}$  NMR (125 MHz,  $\text{C}_6\text{D}_6$ , 298 K):  $\delta$  153.4, 142.6, 110.5, 108.5, 82.8, 82.5, 59.4, 52.4, 24.7. The methyl peaks of -OBpin in  $^1\text{H}$  NMR are overlapping in the region 0.99-1.06 ppm.  $^{11}\text{B}$  NMR (160 MHz,  $\text{C}_6\text{D}_6$ , 298 K):  $\delta$  22.7 (R $\text{CH}_2\text{OBpin}/\text{MeOBpin}$ ).

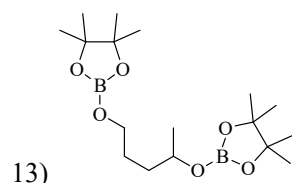

$^1\text{H}$  NMR (500 MHz,  $\text{C}_6\text{D}_6$ , 298 K):  $\delta$  4.34 (m, 1H, CH), 3.96-3.93 (m, 2H,  $\text{CH}_2$ ), 1.67-1.47 (m, 4H,  $\text{CH}_2$ ), 1.15 (d, 3H,  $J = 5.00$  Hz,  $\text{CH}_3$ ).  $^{13}\text{C}$  NMR (125 MHz,  $\text{C}_6\text{D}_6$ , 298 K):  $\delta$  82.4, 82.2, 70.7, 65.0, 34.7, 28.2, 24.7, 22.9. The methyl peaks of -OBpin in  $^1\text{H}$  NMR are overlapping in the region 0.99-1.06 ppm.  $^{11}\text{B}$  NMR (160 MHz,  $\text{C}_6\text{D}_6$ , 298 K):  $\delta$  22.7 (pinBO( $\text{CH}_2$ ) $_3$ CH( $\text{CH}_3$ )OBpin).

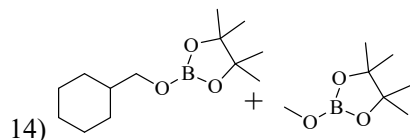

$^1\text{H}$  NMR (500 MHz,  $\text{C}_6\text{D}_6$ ):  $\delta$  3.80 (d,  $J = 6.0$  Hz, 2H,  $\text{CyCH}_2\text{OBpin}$ ), 3.51 (s, 3H,  $\text{CH}_3\text{OBpin}$ ), 1.74-1.72 (m, 2H,  $\text{C}_\gamma\text{CH}_2\text{OBpin}$ ), 1.63-1.60 (m, 3H,  $\text{C}_\gamma\text{CH}_2\text{OBpin}$ ), 1.55-1.53 (m, 2H,  $\text{C}_\gamma\text{CH}_2\text{OBpin}$ ), 0.94-0.89 (m, 4H,  $\text{C}_\gamma\text{CH}_2\text{OBpin}$ ).  $^{13}\text{C}$  NMR (125 MHz,  $\text{C}_6\text{D}_6$ , 298 K):  $\delta$  82.5, 52.4, 70.6, 39.9, 29.7, 26.9, 26.2, 24.8. The methyl peaks of -OBpin in  $^1\text{H}$  NMR are overlapping in the region 0.99-1.08 ppm.  $^{11}\text{B}$  NMR (160 MHz,  $\text{C}_6\text{D}_6$ , 298 K):  $\delta$  22.5 ( $\text{CyCH}_2\text{OBpin}/\text{MeOBpin}$ ).

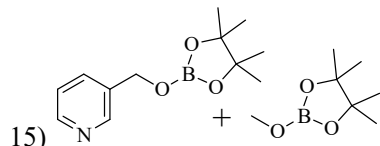

$^1\text{H}$  NMR (500 MHz,  $\text{C}_6\text{D}_6$ , 298 K):  $\delta$  8.68 (s, 1H, 3- $\text{PyCH}_2\text{OBpin}$ ), 8.43 (s, 1H, 3- $\text{PyCH}_2\text{OBpin}$ ), 7.31 (s, 1H, 3- $\text{PyCH}_2\text{OBpin}$ ), 6.67 (s, 1H, 3- $\text{PyCH}_2\text{OBpin}$ ), 4.70 (d, 2H,  $J = 15.00$  Hz, 3- $\text{PyCH}_2\text{OBpin}$ ), 3.51 (s, 3H,  $\text{CH}_3\text{OBpin}$ ).  $^{13}\text{C}$  NMR (125 MHz,  $\text{C}_6\text{D}_6$ , 298 K):  $\delta$  149.1, 135.1, 134.3, 129.6, 123.3, 83.0, 82.5, 64.6, 52.3, 24.7. The methyl peaks of -OBpin in  $^1\text{H}$  NMR are overlapping in the region 0.99-1.06 ppm.  $^{11}\text{B}$  NMR (160 MHz,  $\text{C}_6\text{D}_6$ , 298 K):  $\delta$  22.7 ( $\text{PyCH}_2\text{OBpin}/\text{MeOBpin}$ ).

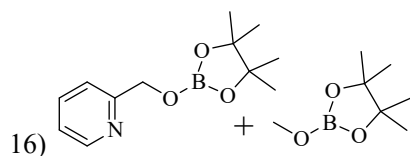

$^1\text{H}$  NMR (500 MHz,  $\text{C}_6\text{D}_6$ , 298 K):  $\delta$  8.41 (d, 1H,  $J = 5.00$  Hz, 2- $\text{PyCH}_2\text{OBpin}$ ), 7.28 (d, 1H,  $J = 10.00$  Hz, 2- $\text{PyCH}_2\text{OBpin}$ ), 7.03 (d, 1H,  $J = 10.00$  Hz, 2- $\text{PyCH}_2\text{OBpin}$ ), 6.55 (t, 1H,  $J = 5.00$  Hz, 2- $\text{PyCH}_2\text{OBpin}$ ), 5.26 (s, 2H, 2- $\text{PyCH}_2\text{OBpin}$ ), 3.51 (s, 3H,  $\text{CH}_3\text{OBpin}$ ).  $^{13}\text{C}$  NMR (125 MHz,  $\text{C}_6\text{D}_6$ , 298 K):  $\delta$  160.0, 148.6, 136.5, 122.1, 119.9, 83.2, 82.7, 82.5, 67.8, 52.4, 24.9, 24.7. The methyl peaks of -OBpin in  $^1\text{H}$  NMR are overlapping in the region 0.99-1.07 ppm.  $^{11}\text{B}$  NMR (160 MHz,  $\text{C}_6\text{D}_6$ , 298 K):  $\delta$  22.7 ( $\text{PyCH}_2\text{OBpin}/\text{MeOBpin}$ ).

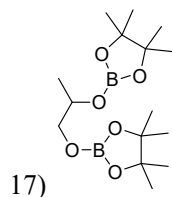

$^1\text{H}$  NMR (500 MHz,  $\text{C}_6\text{D}_6$ , 298 K):  $\delta$  4.55 (s, 1H,  $\text{CH}_3\text{CHOBpin}$ ), 3.90 (d, 2H,  $J = 10.00$  Hz,  $\text{CH}_2\text{OBpin}$ ), 1.63 (m, 3H,  $\text{CH}_3\text{CHOBpin}$ ).  $^{13}\text{C}$  NMR (125 MHz,  $\text{C}_6\text{D}_6$ , 298 K):  $\delta$  82.6, 82.4, 70.9, 69.7, 24.7, 24.8, 18.7. The methyl peaks of -OBpin in  $^1\text{H}$  NMR are overlapping in the region 1.01-1.12 ppm.  $^{11}\text{B}$  NMR (160 MHz,  $\text{C}_6\text{D}_6$ , 298 K):  $\delta$  22.6 ( $\text{pinBOCH}_2\text{CH}(\text{CH}_3)\text{OBpin}$ ).

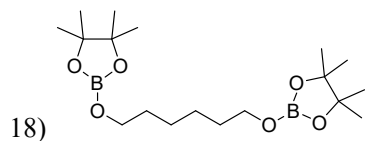

$^1\text{H}$  NMR (500 MHz,  $\text{C}_6\text{D}_6$ , 298 K):  $\delta$  3.90 (t, 4H,  $J = 7.50$  Hz,  $\text{CH}_2$ ), 1.50-1.47 (m, 4H,  $\text{CH}_2$ ), 1.24-1.22 (m, 4H,  $\text{CH}_2$ ).  $^{13}\text{C}$  NMR (125 MHz,  $\text{C}_6\text{D}_6$ , 298 K):  $\delta$  82.4, 65.0, 32.0, 25.7, 24.8. The

methyl peaks of -OBpin in  $^1\text{H}$  NMR are in the region 1.07 ppm.  $^{11}\text{B}$  NMR (160 MHz,  $\text{C}_6\text{D}_6$ , 298 K):  $\delta$  22.6 (pinBOC $_2\text{H}_{12}\text{OBpin}$ ).

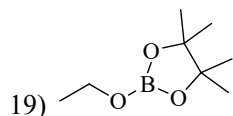

$^1\text{H}$  NMR (500 MHz,  $\text{C}_6\text{D}_6$ , 298 K):  $\delta$  3.93 (q, 2H,  $J = 5.00$  Hz,  $\text{CH}_3\text{CH}_2\text{OBpin}$ ), 1.12 (t, 3H,  $J = 10.00$  Hz,  $\text{CH}_3\text{CH}_2\text{OBpin}$ ).  $^{13}\text{C}$  NMR (125 MHz,  $\text{C}_6\text{D}_6$ , 298 K):  $\delta$  82.4, 60.7, 24.7, 17.5. The methyl peaks of -OBpin in  $^1\text{H}$  NMR are in the 1.10 ppm.  $^{11}\text{B}$  NMR (160 MHz,  $\text{C}_6\text{D}_6$ , 298 K):  $\delta$  22.6 (EtOBpin).

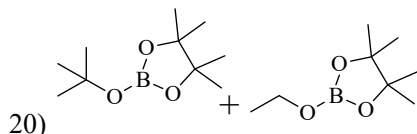

$^1\text{H}$  NMR (500 MHz,  $\text{C}_6\text{D}_6$ , 298 K):  $\delta$  3.92 (q, 2H,  $J = 5.00$  Hz,  $\text{CH}_3\text{CH}_2\text{OBpin}$ ), 1.12 (t, 3H,  $J = 10.00$  Hz,  $\text{CH}_3\text{CH}_2\text{OBpin}$ ), 1.01 (s, 9H,  $(\text{CH}_3)_3\text{COBpin}$ ).  $^{13}\text{C}$  NMR (125 MHz,  $\text{C}_6\text{D}_6$ , 298 K):  $\delta$  82.3, 81.7, 73.5, 60.7, 30.2, 24.7, 17.5. The methyl peaks of -OBpin in  $^1\text{H}$  NMR are overlapping in the region 1.01-1.05 ppm.  $^{11}\text{B}$  NMR (160 MHz,  $\text{C}_6\text{D}_6$ , 298 K):  $\delta$  22.6 (EtOBpin), 21.7 ( $t\text{BuOBpin}$ ).

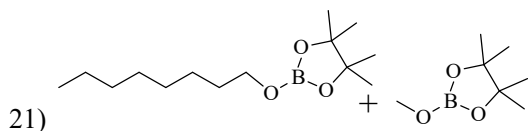

$^1\text{H}$  (500 MHz,  $\text{C}_6\text{D}_6$ , 298 K):  $\delta$  3.92 (t, 2H,  $J = 7.50$  Hz,  $\text{CH}_2$ ), 3.49 (s, 3H,  $\text{CH}_3\text{OBpin}$ ), 1.56-1.51, (m, 2H,  $\text{CH}_2$ ), 1.30-1.22 (m, 10H,  $\text{CH}_2$ ), 0.86 (t,  $J = 7.00$  Hz, 3H,  $\text{CH}_3$ ).  $^{13}\text{C}$  NMR (125 MHz,  $\text{C}_6\text{D}_6$ , 298 K):  $\delta$  83.1, 82.5, 65.1, 52.4, 32.2, 32.1, 29.7, 25.0, 24.8, 23.1, 14.3. The methyl peaks of -OBpin in  $^1\text{H}$  NMR are overlapping in the region 1.00-1.07 ppm.  $^{11}\text{B}$  NMR (160 MHz,  $\text{C}_6\text{D}_6$ , 298 K):  $\delta$  22.6 ( $\text{C}_8\text{H}_{17}\text{OBpin}/\text{MeOBpin}$ ).

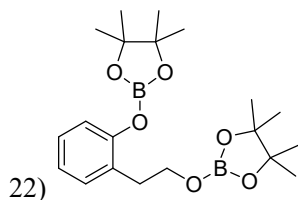

$^1\text{H}$  NMR (500 MHz,  $\text{C}_6\text{D}_6$ , 298 K):  $\delta$  7.28 (d, 1H,  $J = 10.00$  Hz,  $\text{PhCH}$ ), 7.11 (d, 1H,  $J = 10.00$  Hz,  $\text{PhCH}$ ), 6.99 (d, 1H,  $J = 5.00$  Hz,  $\text{PhCH}$ ), 6.82 (d, 1H,  $J = 5.00$  Hz,  $\text{PhCH}$ ), 4.26 (t, 2H,  $J = 7.50$ ,  $\text{CH}_2$ ), 3.07 (t, 2H,  $J = 7.50$ ,  $\text{CH}_2$ ).  $^{13}\text{C}$  NMR (125 MHz,  $\text{C}_6\text{D}_6$ , 298 K):  $\delta$  152.7, 131.4, 129.2, 127.6, 123.5, 120.3, 83.3, 83.2, 82.3, 64.8, 33.2, 24.9, 24.7. The methyl peaks of -OBpin in  $^1\text{H}$  NMR are overlapping in the region 0.99-1.05 ppm.  $^{11}\text{B}$  NMR (160 MHz,  $\text{C}_6\text{D}_6$ , 298 K):  $\delta$  22.2 (pinBOCPh $_2\text{H}_4\text{OBpin}$ ).

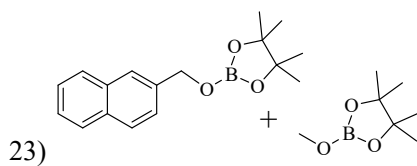

$^1\text{H}$  NMR (500 MHz,  $\text{C}_6\text{D}_6$ , 298 K):  $\delta$  7.79 (s, 1H,  $\text{PhCH}$ ), 7.61-7.58 (m, 3H,  $\text{PhCH}$ ), 7.40 (d, 1H,  $J = 10.00$  Hz,  $\text{PhCH}$ ), 7.24-7.22 (m, 2H,  $\text{PhCH}$ ), 5.11 (s, 2H,  $\text{CH}_2$ ), 3.51 (s, 3H,  $\text{CH}_3\text{OBpin}$ ).  $^{13}\text{C}$  NMR (125 MHz,  $\text{C}_6\text{D}_6$ , 298 K):  $\delta$  133.9, 133.4, 128.4, 126.3, 125.9, 125.7, 125.3, 83.2, 83.8, 67.0,

52.4, 24.9. The methyl peaks of -OBpin in  $^1\text{H}$  NMR are overlapping in the region 0.99-1.05 ppm.  $^{11}\text{B}$  NMR (160 MHz,  $\text{C}_6\text{D}_6$ , 298 K):  $\delta$  22.7 ( $\text{Ph}_2\text{CH}_2\text{OBpin/MeOBpin}$ ).

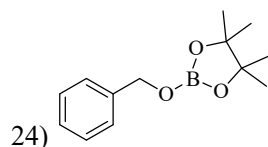

$^1\text{H}$  NMR (500 MHz,  $\text{C}_6\text{D}_6$ , 298 K):  $\delta$  7.32 (d, 2H,  $J = 10.00$  Hz, PhCH), 7.13-7.04 (m, 3H, PhCH), 4.97 (s, 2H,  $\text{CH}_2$ ).  $^{13}\text{C}$  NMR (125 MHz,  $\text{C}_6\text{D}_6$ , 298 K):  $\delta$  140.0, 128.6, 127.6, 127.1, 83.2, 82.7, 67.0, 24.9, 24.7. The methyl peaks of -OBpin in  $^1\text{H}$  NMR are in the 1.03 ppm.  $^{11}\text{B}$  NMR (160 MHz,  $\text{C}_6\text{D}_6$ , 298 K):  $\delta$  22.7 ( $\text{PhCH}_2\text{OBpin}$ ).

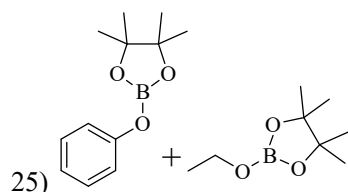

$^1\text{H}$  NMR (500 MHz,  $\text{C}_6\text{D}_6$ , 298 K):  $\delta$  7.20-7.05 (m, 4H, PhCH), 6.84 (t, 2H,  $J = 7.50$  Hz, PhCH), 3.89 (q, 2H,  $J = 7.50$ ,  $\text{CH}_2$ ), 1.11 (t, 3H,  $J = 10.00$ ,  $\text{CH}_3$ ).  $^{13}\text{C}$  NMR (125 MHz,  $\text{C}_6\text{D}_6$ , 298 K):  $\delta$  154.4, 129.6, 123.3, 120.1, 82.4, 82.3, 60.7, 24.9, 17.5. The methyl peaks of -OBpin in  $^1\text{H}$  NMR are overlapping in the region 1.01-1.06 ppm.  $^{11}\text{B}$  NMR (160 MHz,  $\text{C}_6\text{D}_6$ , 298 K):  $\delta$  22.4 ( $\text{PhOBpin/MeOBpin}$ ).

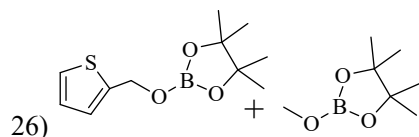

$^1\text{H}$  NMR (500 MHz,  $\text{C}_6\text{D}_6$ , 298 K):  $\delta$  6.84-6.82 (m, 2H, CH), 6.66 (m, 1H, CH), 5.02 (s, 2H,  $\text{CH}_2$ ), 3.51 (s, 3H,  $\text{CH}_3\text{OBpin}$ ).  $^{13}\text{C}$  NMR (125 MHz,  $\text{C}_6\text{D}_6$ , 298 K):  $\delta$  142.8, 126.8, 126.1, 125.7, 82.9, 82.5, 61.8, 52.4, 24.7. The methyl peaks of -OBpin in  $^1\text{H}$  NMR are overlapping in the region 0.99-1.04 ppm.  $^{11}\text{B}$  NMR (160 MHz,  $\text{C}_6\text{D}_6$ , 298 K):  $\delta$  22.7 ( $\text{RCH}_2\text{OBpin/MeOBpin}$ ).

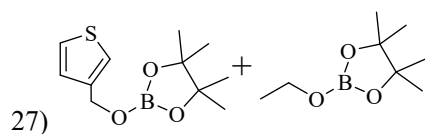

$^1\text{H}$  NMR (500 MHz,  $\text{C}_6\text{D}_6$ , 298 K):  $\delta$  6.96 (s, 1H, CH), 6.93(d, 1H,  $J = 5.0$  Hz, CH), 6.84(t, 1H,  $J = 5.00$  Hz, CH), 4.89 (s, 2H,  $\text{CH}_2$ ), 3.93 (d, 3H,  $J = 7.50$  Hz,  $\text{CH}_2$ ), 1.12 (t, 3H,  $J = 5.00$  Hz,  $\text{CH}_3$ ).  $^{13}\text{C}$  NMR (125 MHz,  $\text{C}_6\text{D}_6$ , 298 K):  $\delta$  141.2, 127.0, 126.0, 122.1, 82.7, 82.4, 62.7, 60.7, 24.9, 17.5. The methyl peaks of -OBpin in  $^1\text{H}$  NMR are overlapping in the region 0.99-1.05 ppm.  $^{11}\text{B}$  NMR (160 MHz,  $\text{C}_6\text{D}_6$ , 298 K):  $\delta$  22.5 ( $\text{RCH}_2\text{OBpin/EtOBpin}$ ).

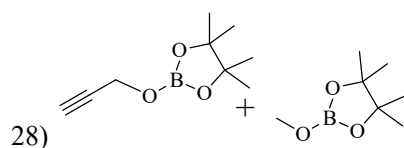

$^1\text{H}$  NMR (500 MHz,  $\text{C}_6\text{D}_6$ , 298 K):  $\delta$  4.37 (s, 2H,  $\text{CH}_2$ ), 3.51 (s, 3H,  $\text{CH}_3\text{OBpin}$ ), 2.01 (s, 1H, CH).  $^{13}\text{C}$  NMR (125 MHz,  $\text{C}_6\text{D}_6$ , 298 K):  $\delta$  83.1, 82.5, 79.8, 73.8, 53.0, 52.4, 24.9, 24.7. The methyl peaks of -OBpin in  $^1\text{H}$  NMR are overlapping in the region 1.00-1.06 ppm.  $^{11}\text{B}$  NMR (160 MHz,



C<sub>6</sub>D<sub>6</sub>, 298 K):  $\delta$  22.7 (MeOBpin), 21.8 (CHCCH<sub>2</sub>OBpin).

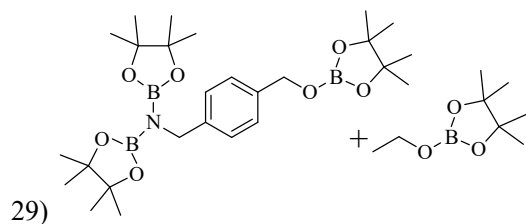

<sup>1</sup>H NMR (500 MHz, C<sub>6</sub>D<sub>6</sub>, 298 K):  $\delta$  7.58 (d, 2H, *J* = 8.0 Hz, PhCH), 7.39 (d, 2H, *J* = 8.0 Hz, PhCH), 5.01 (s, 2H, CH<sub>2</sub>), 4.86 (s, 2H, CH<sub>2</sub>), 3.93 (q, 3H, *J* = 7.5 Hz, CH<sub>2</sub>), 1.12 (t, 3H, *J* = 5.00 Hz, CH<sub>3</sub>). <sup>13</sup>C NMR (125 MHz, C<sub>6</sub>D<sub>6</sub>, 298 K):  $\delta$  143.0, 138.1, 127.4, 127.1, 82.7, 82.4, 82.4, 67.0, 60.7, 47.7, 24.9, 24.7, 17.5. The methyl peaks of -OBpin in <sup>1</sup>H NMR are overlapping in the region 0.99-1.05 ppm. <sup>11</sup>B NMR (160 MHz, C<sub>6</sub>D<sub>6</sub>, 298 K):  $\delta$  22.6 ((pinB)<sub>2</sub>NCH<sub>2</sub>C<sub>6</sub>H<sub>4</sub>CH<sub>2</sub>OBpin/EtOBpin).

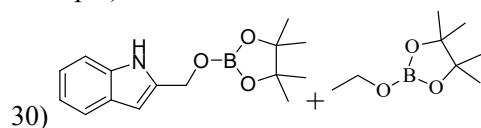

<sup>1</sup>H NMR (500 MHz, C<sub>6</sub>D<sub>6</sub>, 298 K):  $\delta$  8.39 (d, 1H, *J* = 7.5 Hz, indole-CH), 7.58 (d, 1H, *J* = 7.5 Hz, indole-CH), 7.30 (d, 1H, *J* = 7.0 Hz, indole-CH), 7.20 (t, 1H, *J* = 6.5 Hz, indole-CH), 6.91 (s, 1H, indole-CH), 5.52 (s, 2H, CH<sub>2</sub>), 3.92 (q, 2H, CH<sub>2</sub>), 1.11 (t, 3H, *J* = 5.00 Hz, CH<sub>3</sub>). <sup>13</sup>C NMR (125 MHz, C<sub>6</sub>D<sub>6</sub>, 298 K):  $\delta$  142.7, 141.6, 131.4, 123.1, 122.0, 120.6, 115.5, 107.3, 83.9, 82.8, 82.4, 62.1, 60.7, 24.7, 24.5, 17.5. The methyl peaks of -OBpin in <sup>1</sup>H NMR are overlapping in the region 0.96-1.06 ppm. <sup>11</sup>B NMR (160 MHz, C<sub>6</sub>D<sub>6</sub>, 298 K):  $\delta$  27.9 (indole-CH<sub>2</sub>OBpin), 22.6 (EtOBpin).

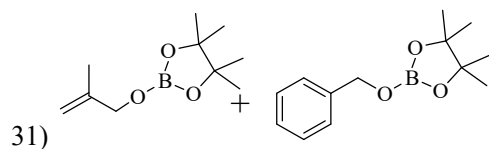

<sup>1</sup>H NMR (500 MHz, C<sub>6</sub>D<sub>6</sub>, 298 K):  $\delta$  7.33 (d, 2H, *J* = 10.0 Hz, PhCH), 7.13 (t, 2H, *J* = 7.5 Hz, PhCH), 7.07 (d, 1H, *J* = 10.0 Hz, PhCH), 5.18 (s, 1H, CH), 4.97 (s, 2H, CH<sub>2</sub>), 4.83 (s, 1H, CH), 4.35 (s, 2H, CH<sub>2</sub>), 1.56 (s, 3H, CH<sub>3</sub>). <sup>13</sup>C NMR (125 MHz, C<sub>6</sub>D<sub>6</sub>, 298 K):  $\delta$  143.3, 140.0, 128.6, 127.6, 127.3, 110.1, 82.7, 82.6, 68.4, 66.9, 24.7, 19.0. The methyl peaks of -OBpin in <sup>1</sup>H NMR are overlapping in the region 0.99-1.05 ppm. <sup>11</sup>B NMR (160 MHz, C<sub>6</sub>D<sub>6</sub>, 298 K):  $\delta$  22.7 (PhCH<sub>2</sub>OBpin/H<sub>2</sub>C=CHMeCH<sub>2</sub>OBpin).

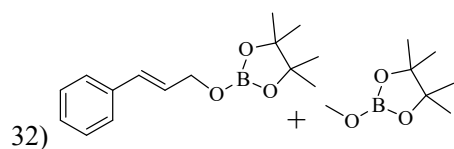

<sup>1</sup>H NMR (500 MHz, C<sub>6</sub>D<sub>6</sub>, 298 K):  $\delta$  7.19 (d, 2H, *J* = 10.0 Hz, PhCH), 7.00-7.10 (t, *J* = 7.5 Hz, 2H, PhCH), 7.00-7.03 (m, 1H, PhCH), 6.64 (d, 1H, *J* = 15.0 Hz, CH), 6.15-6.21 (m, 1H, CH), 4.56 (d, 2H, *J* = 5.0 Hz, CH<sub>2</sub>). <sup>13</sup>C NMR (125 MHz, C<sub>6</sub>D<sub>6</sub>, 298 K):  $\delta$  137.3, 130.9, 128.8, 127.7, 127.5, 126.8, 82.7, 82.5, 65.5, 52.4, 24.7. The methyl peaks of -OBpin in <sup>1</sup>H NMR are overlapping in the region 0.99-1.06 ppm. <sup>11</sup>B NMR (160 MHz, C<sub>6</sub>D<sub>6</sub>, 298 K):  $\delta$  22.7 (PhC<sub>3</sub>H<sub>4</sub>OBpin/MeOBpin).

### NMR data of ester hydroboration products

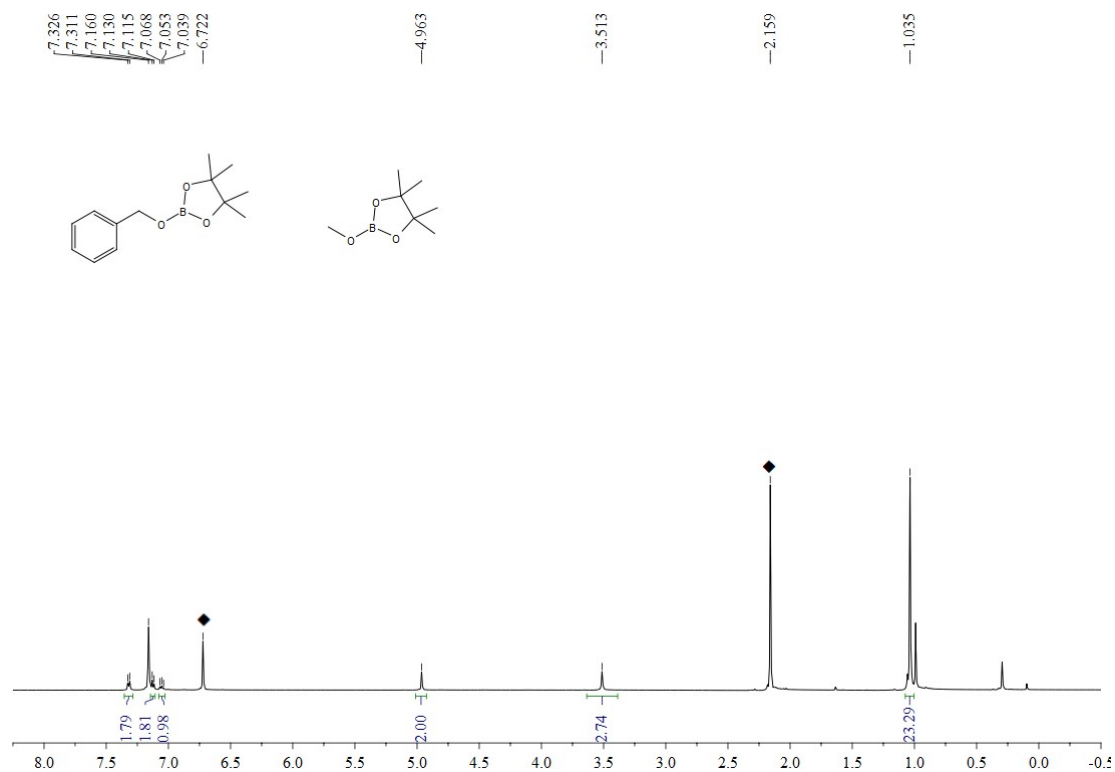

**Figure S16.** <sup>1</sup>H NMR spectrum (500 MHz, C<sub>6</sub>D<sub>6</sub>) of PhCH<sub>2</sub>OBpin/MeOBpin (◆ represents mesitylene)

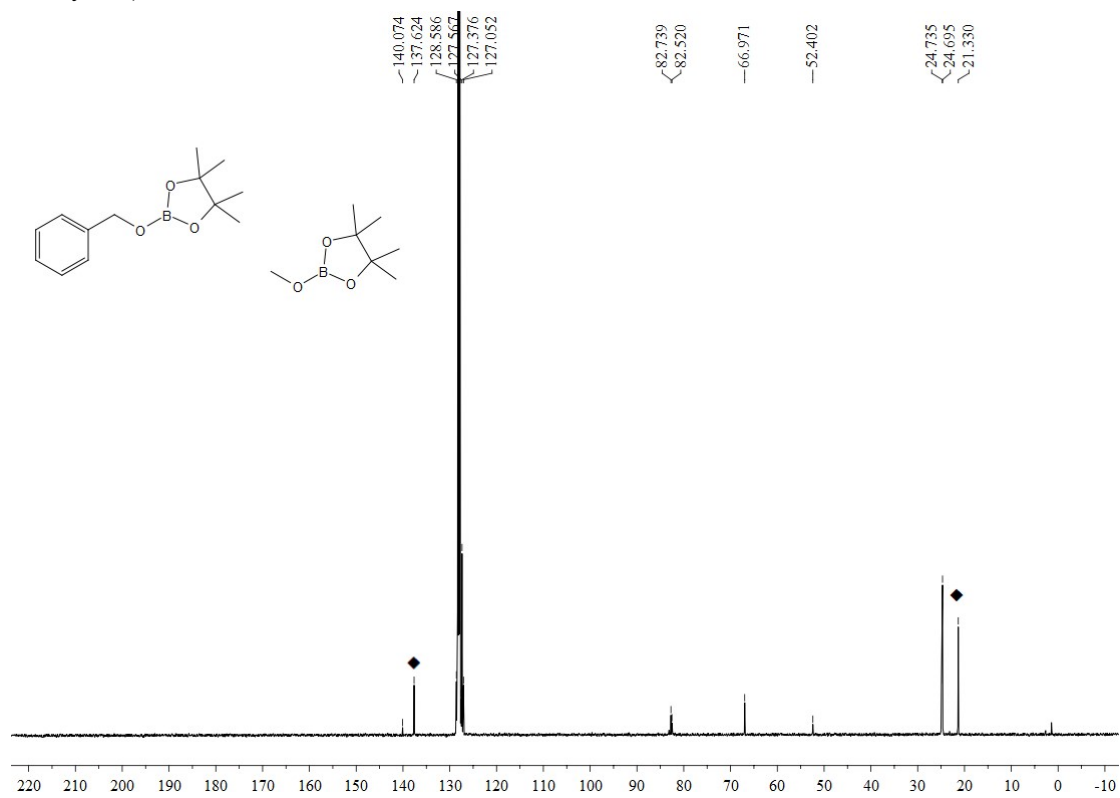

**Figure S17.** <sup>13</sup>C NMR spectrum (125 MHz, C<sub>6</sub>D<sub>6</sub>) of PhCH<sub>2</sub>OBpin/MeOBpin (◆ represents

mesitylene).

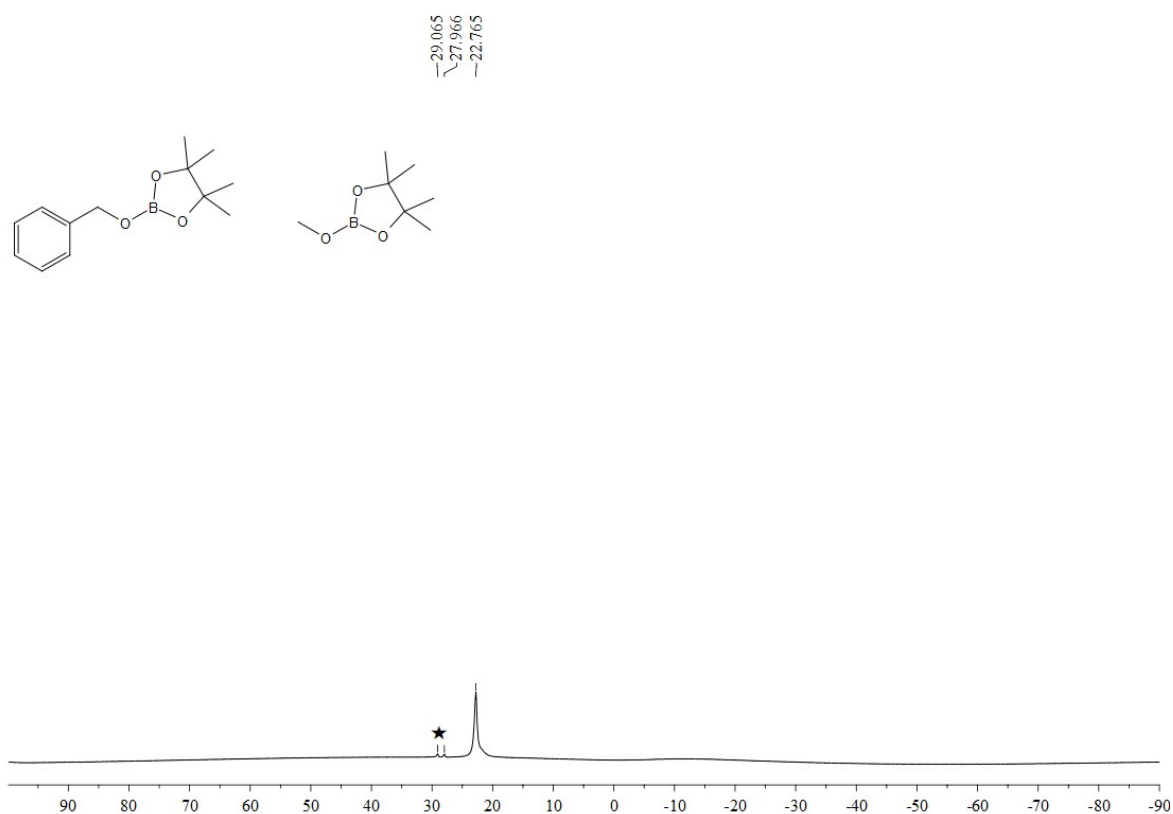

**Figure S18.** <sup>11</sup>B NMR spectrum (128 MHz, C<sub>6</sub>D<sub>6</sub>) of PhCH<sub>2</sub>OBpin/MeOBpin (★ indicates excess HBpin).

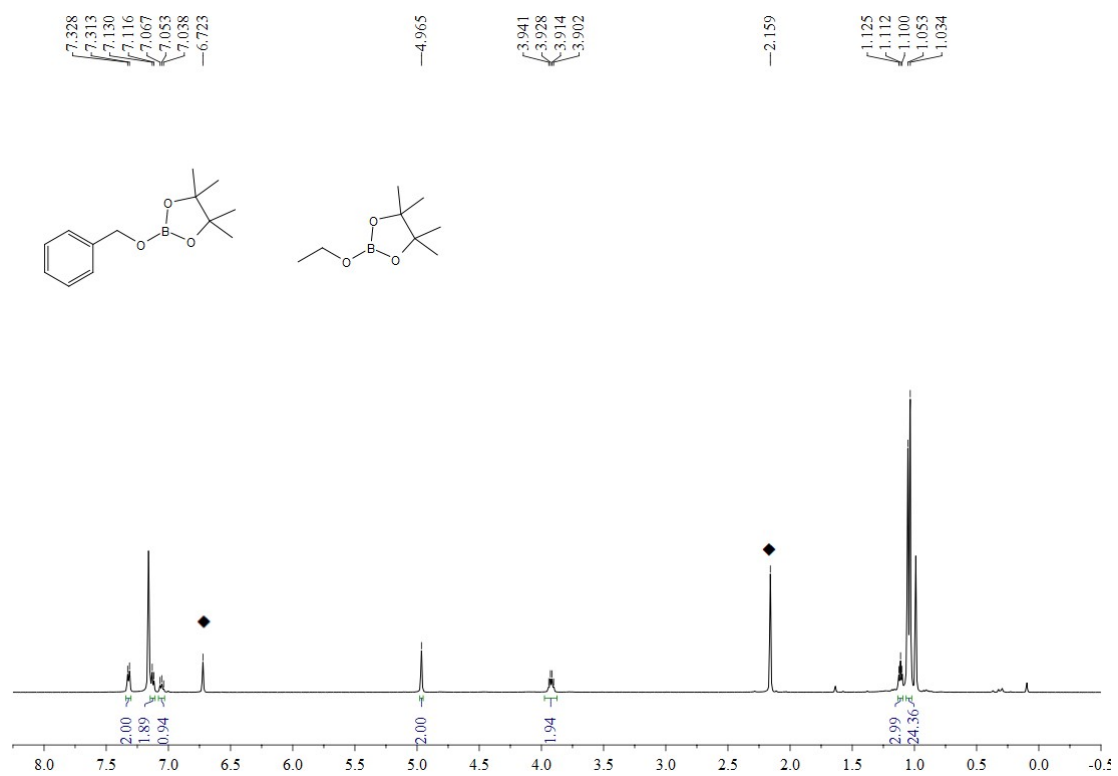

**Figure S19.** <sup>1</sup>H NMR spectrum (500 MHz, C<sub>6</sub>D<sub>6</sub>) of PhCH<sub>2</sub>OBpin/EtOBpin (◆ represents

mesitylene)

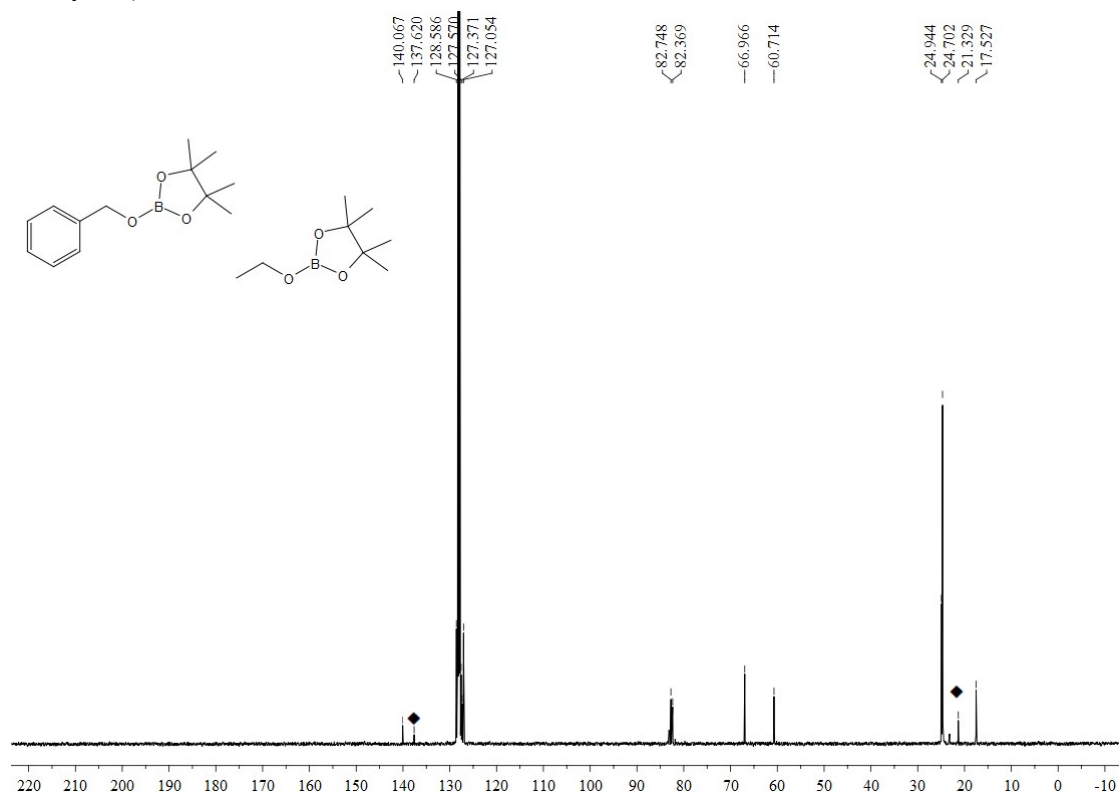

**Figure S20.** <sup>13</sup>C NMR spectrum (125 MHz, C<sub>6</sub>D<sub>6</sub>) of PhCH<sub>2</sub>OBpin/EtOBpin (◆ represents mesitylene)

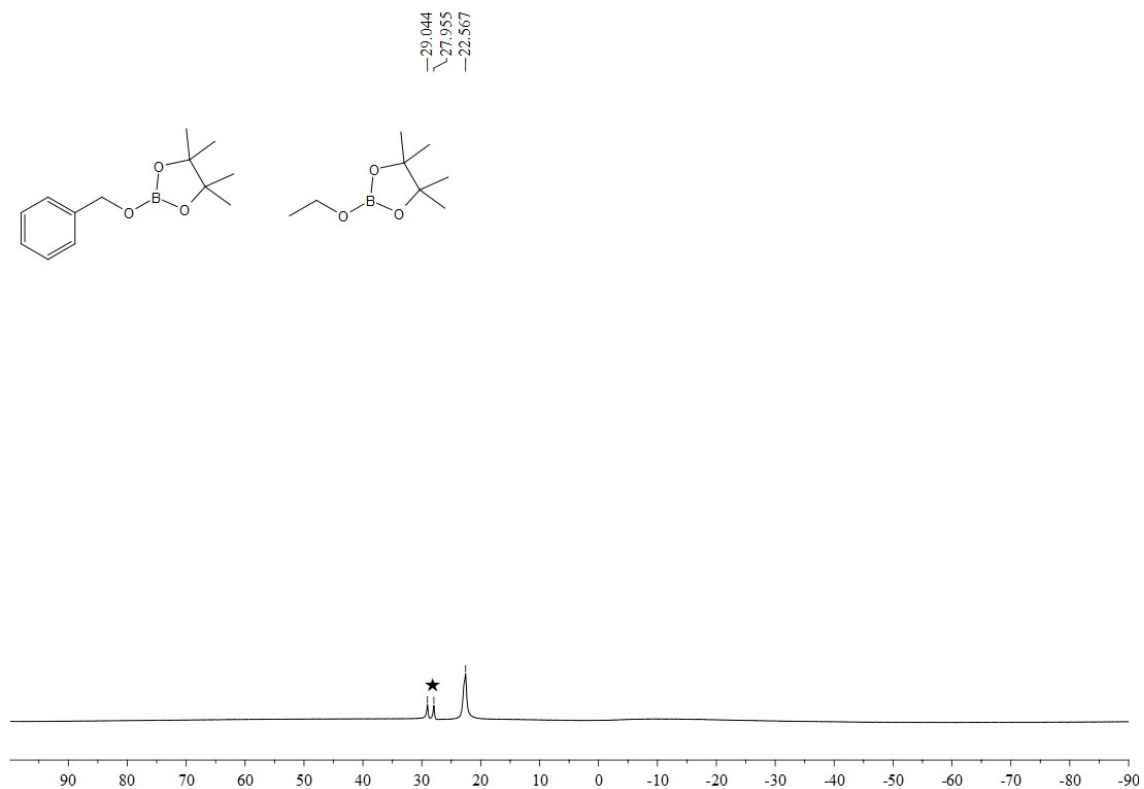

**Figure S21.** <sup>11</sup>B NMR spectrum (128 MHz, C<sub>6</sub>D<sub>6</sub>) of PhCH<sub>2</sub>OBpin/EtOBpin (★ represents HBpin).

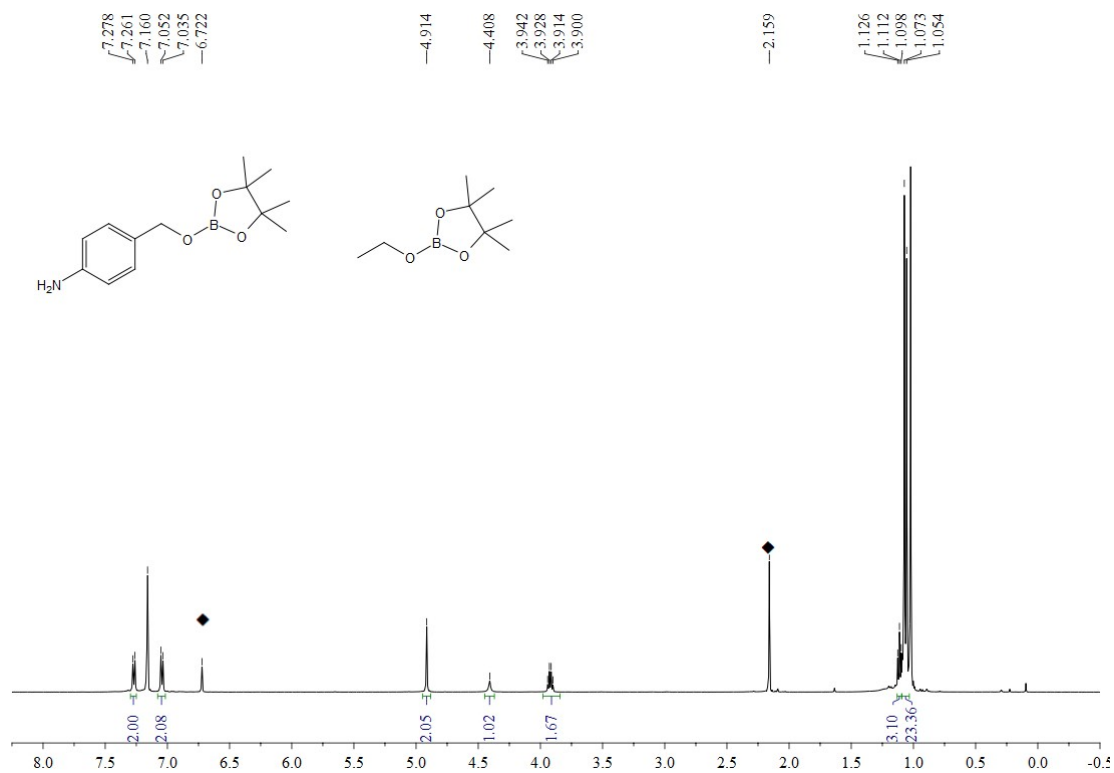

**Figure S22.** <sup>1</sup>H NMR spectrum (500 MHz, C<sub>6</sub>D<sub>6</sub>) of NH<sub>2</sub>PhCH<sub>2</sub>OBpin/EtOBpin (◆ represents mesitylene)

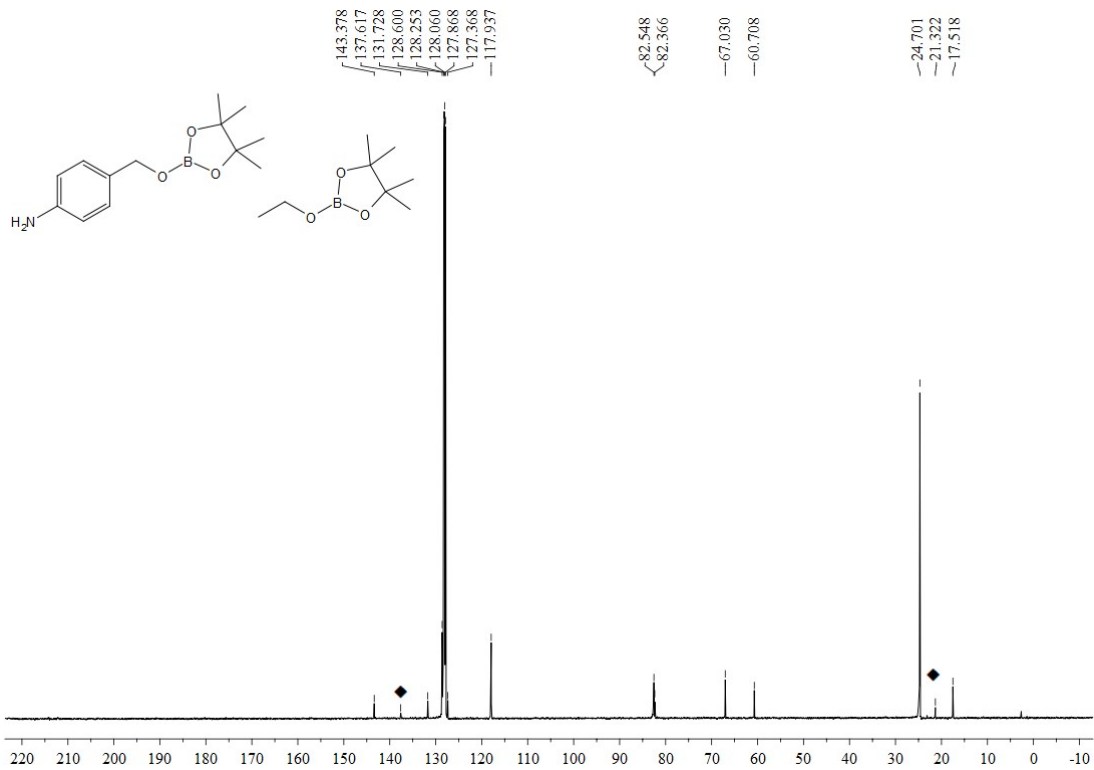

**Figure S23.** <sup>13</sup>C NMR spectrum (125 MHz, C<sub>6</sub>D<sub>6</sub>) of NH<sub>2</sub>PhCH<sub>2</sub>OBpin/EtOBpin (◆ represents mesitylene).

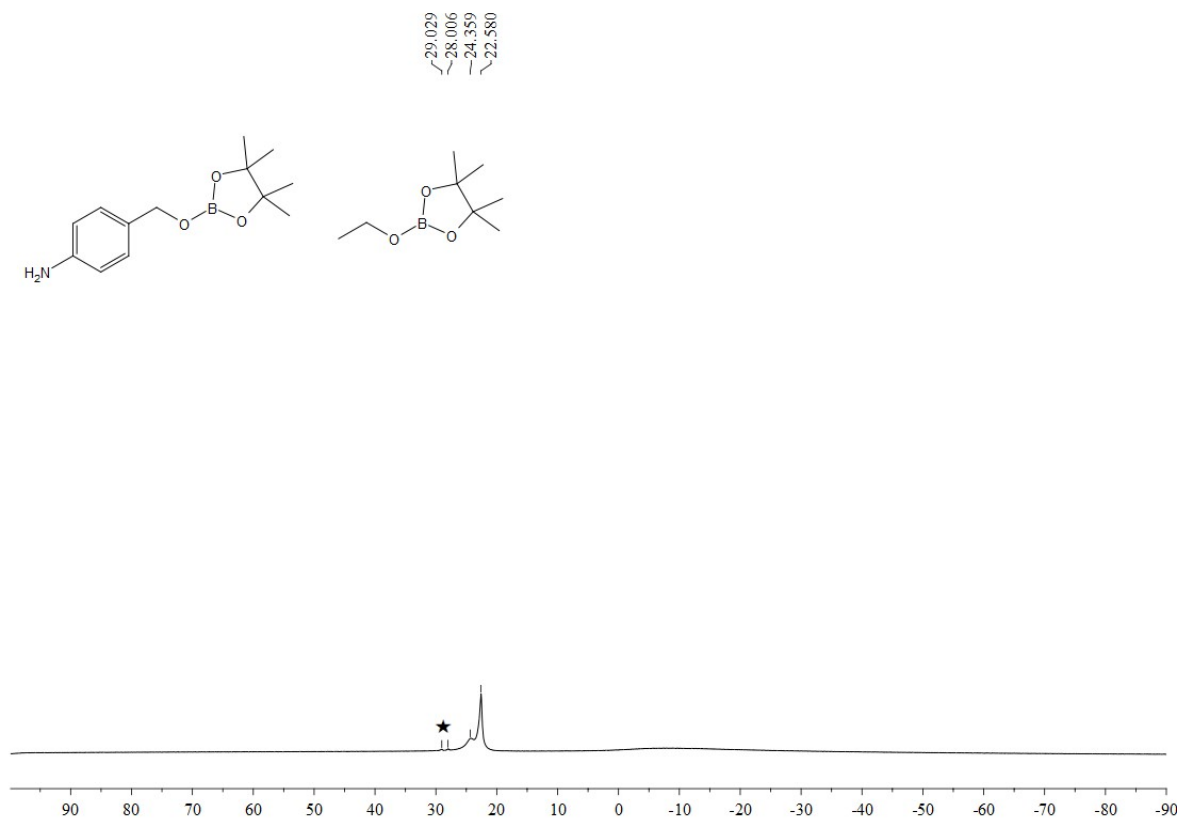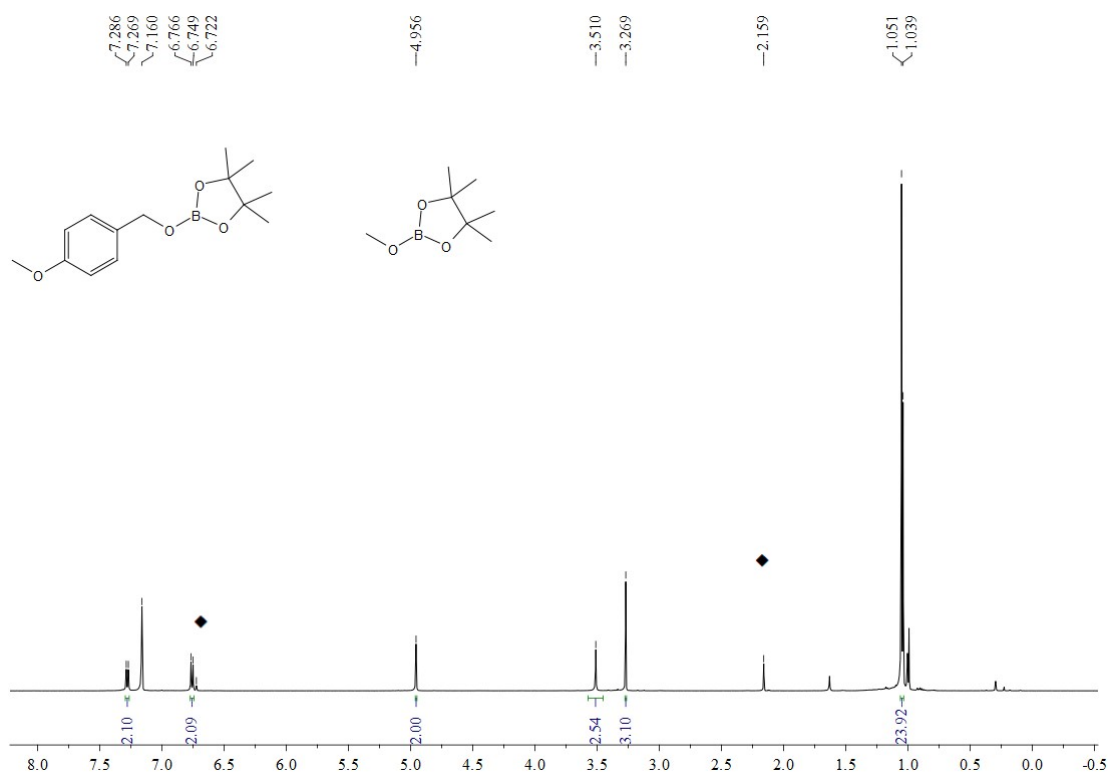

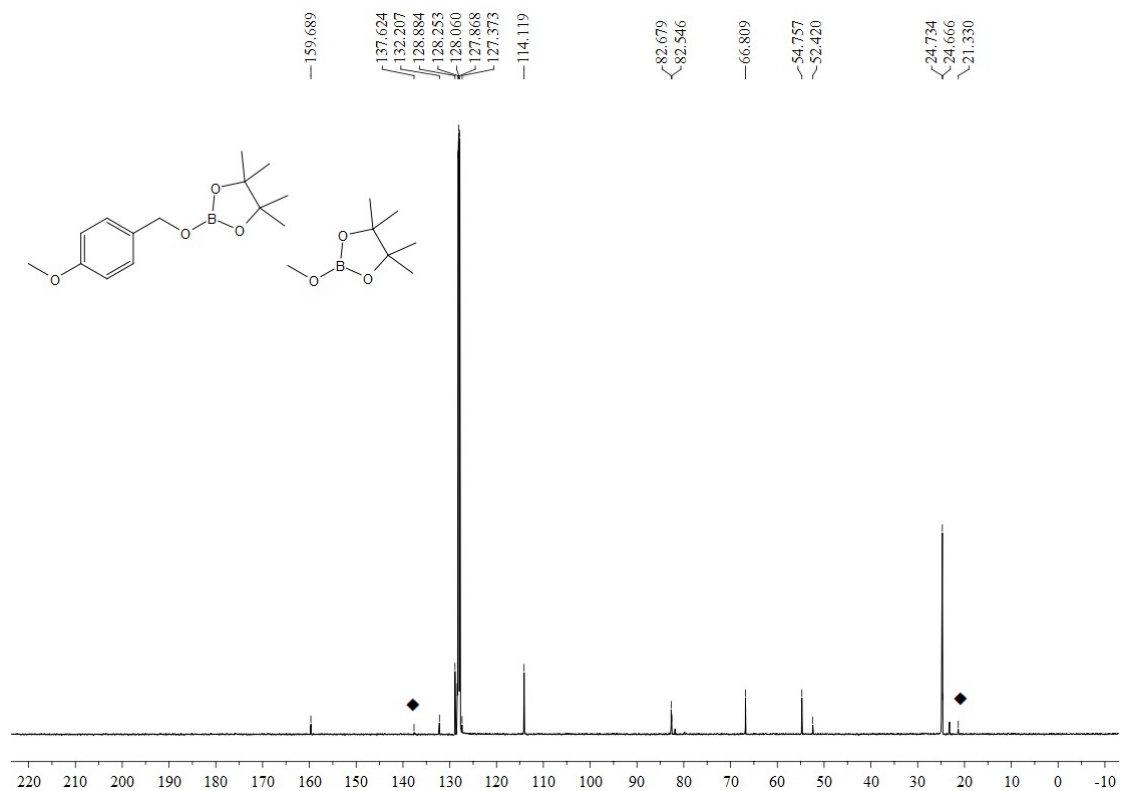

**Figure S26.** <sup>13</sup>C NMR spectrum (125 MHz, C<sub>6</sub>D<sub>6</sub>) of CH<sub>3</sub>OPhCH<sub>2</sub>OBpin/MeOBpin (◆ represents mesitylene)

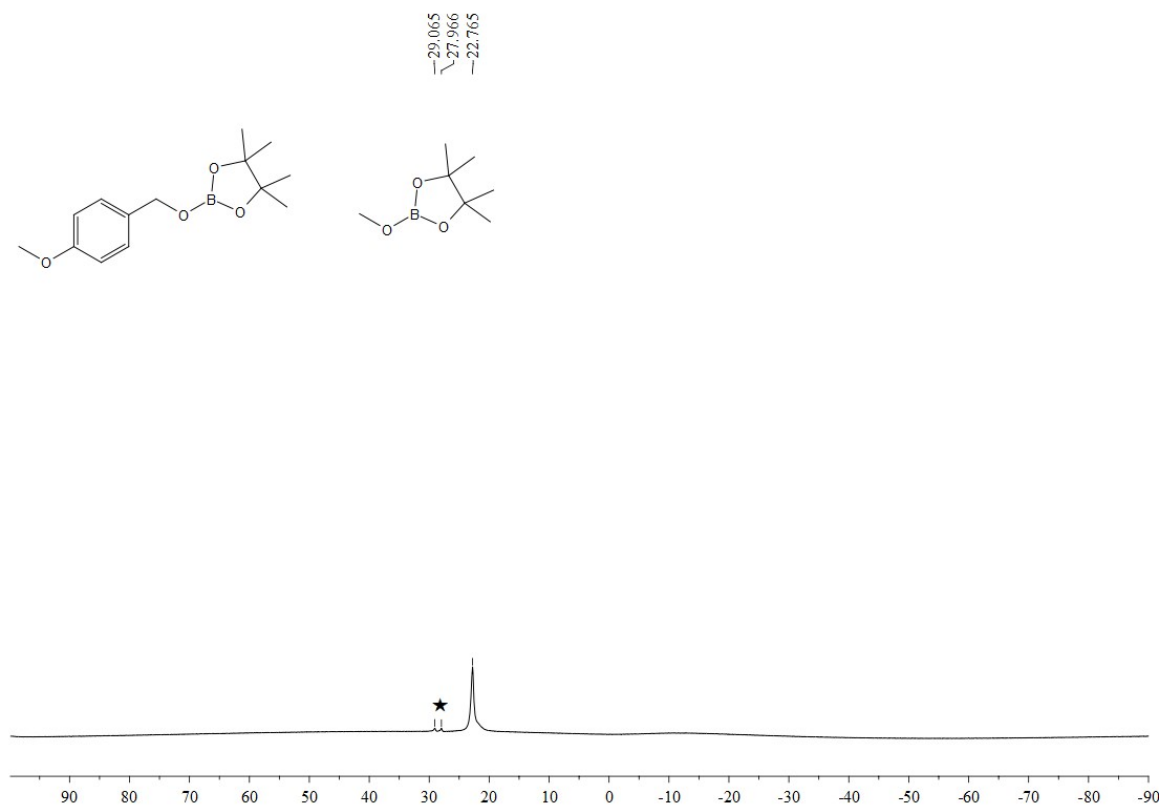

**Figure S27.** <sup>11</sup>B NMR spectrum (128 MHz, C<sub>6</sub>D<sub>6</sub>) of CH<sub>3</sub>OPhCH<sub>2</sub>OBpin/MeOBpin (★ represents HBpin).

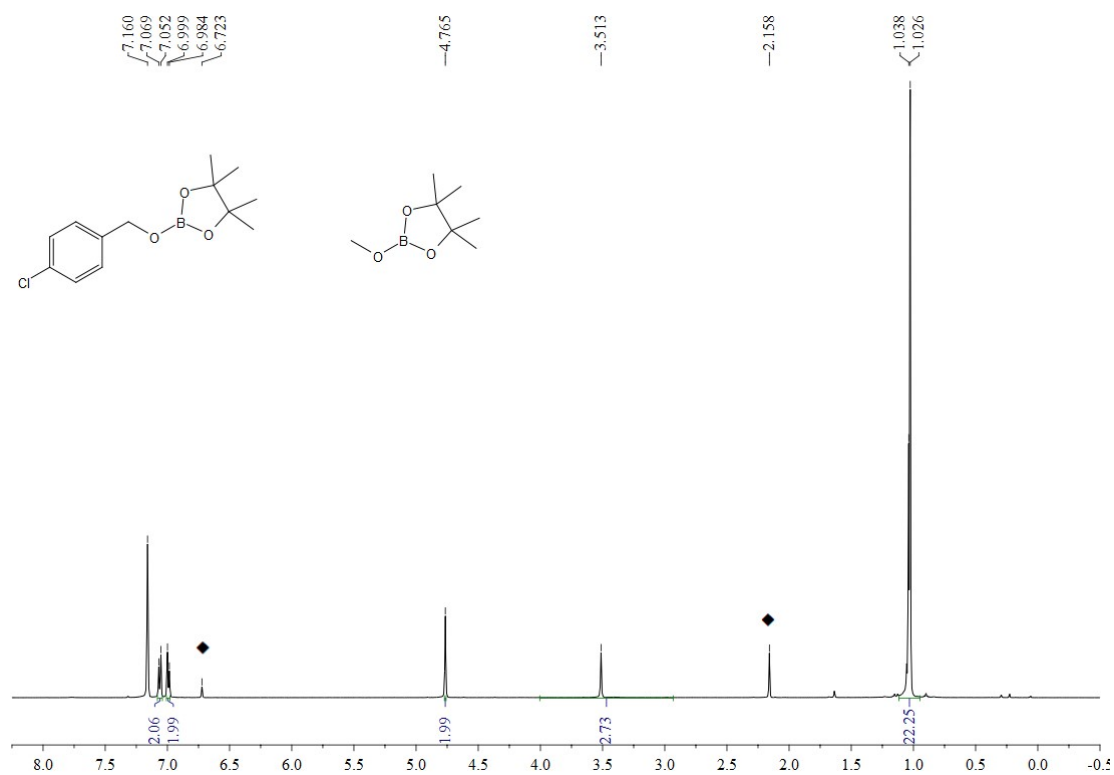

**Figure S28.**  $^1\text{H}$  NMR spectrum (500 MHz,  $\text{C}_6\text{D}_6$ ) of  $\text{ClPhCH}_2\text{OBpin/MeOBpin}$  (◆ represents mesitylene).

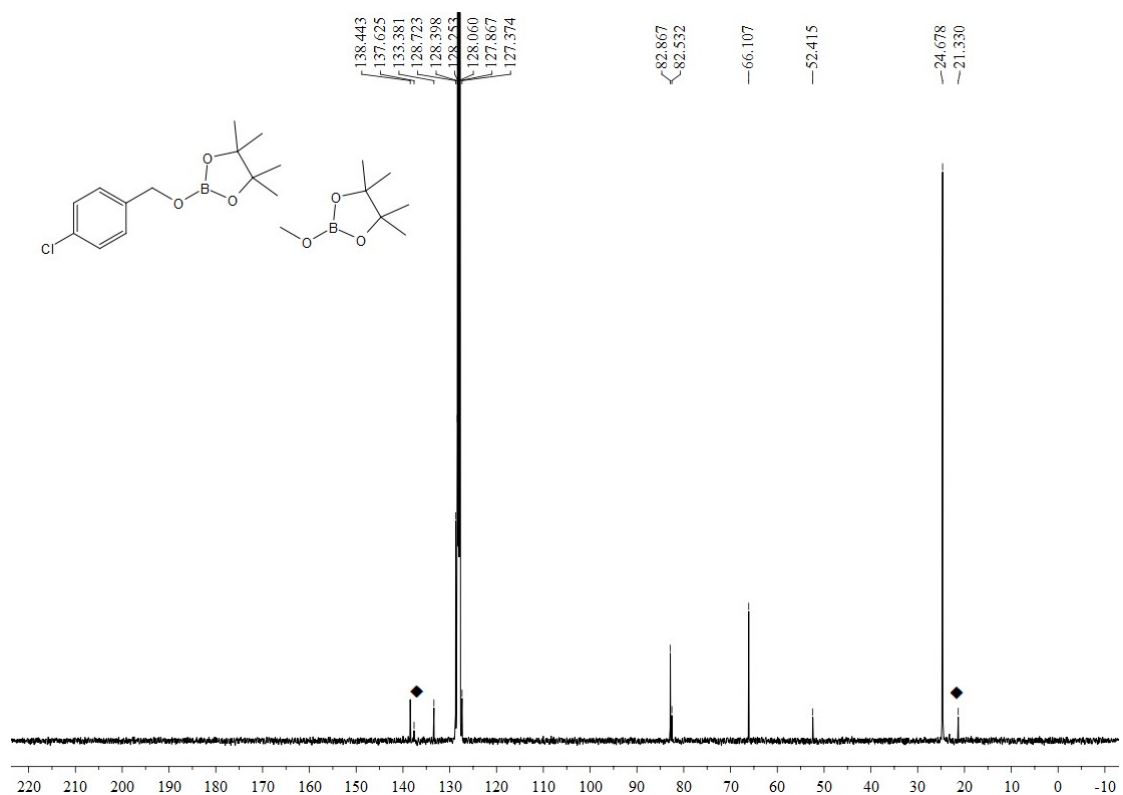

**Figure S29.**  $^{13}\text{C}$  NMR spectrum (125 MHz,  $\text{C}_6\text{D}_6$ ) of  $\text{ClPhCH}_2\text{OBpin/MeOBpin}$  (◆ represents mesitylene).



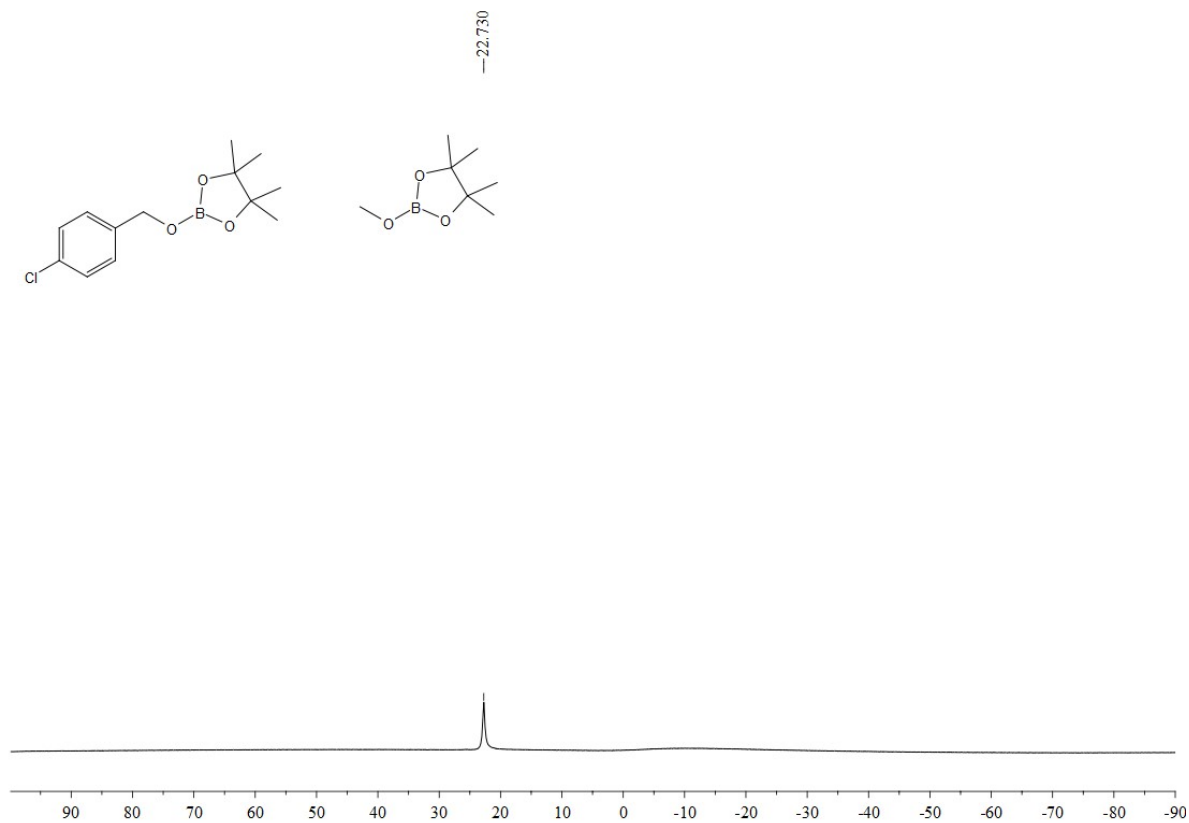

**Figure S30.**  $^{11}\text{B}$  NMR spectrum (128 MHz,  $\text{C}_6\text{D}_6$ ) of ClPhCH<sub>2</sub>OBpin (★ represents HBpin).

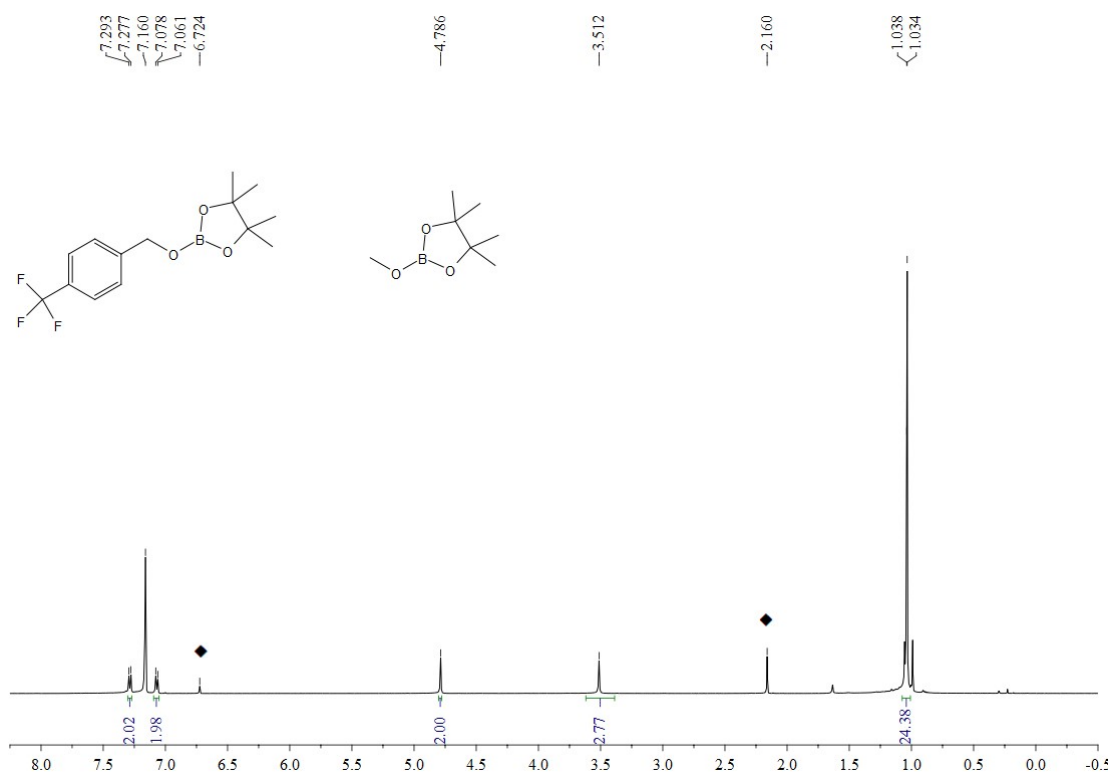

**Figure S31.**  $^1\text{H}$  NMR spectrum (500 MHz,  $\text{C}_6\text{D}_6$ ) of CF<sub>3</sub>PhCH<sub>2</sub>OBpin (◆ represents HBpin).

mesitylene)

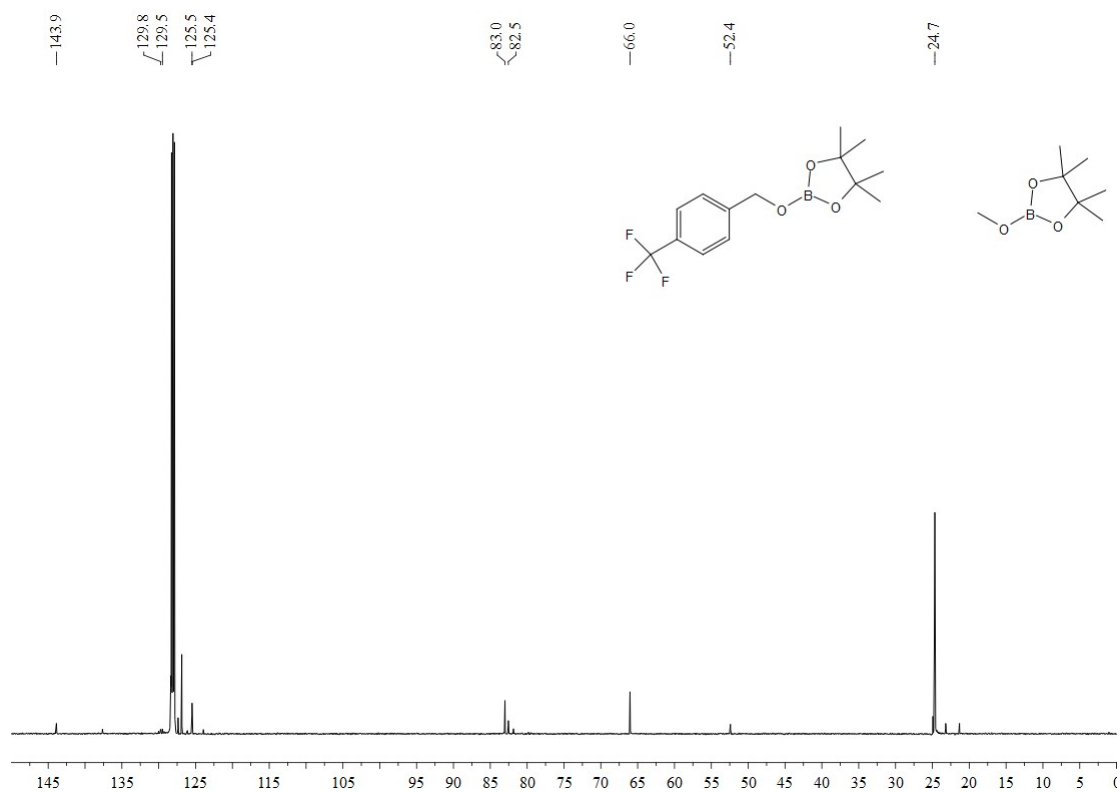

**Figure S32.** <sup>13</sup>C NMR spectrum (125 MHz, C<sub>6</sub>D<sub>6</sub>) of CF<sub>3</sub>PhCH<sub>2</sub>OBpin/MeOBpin (◆ represents mesitylene)

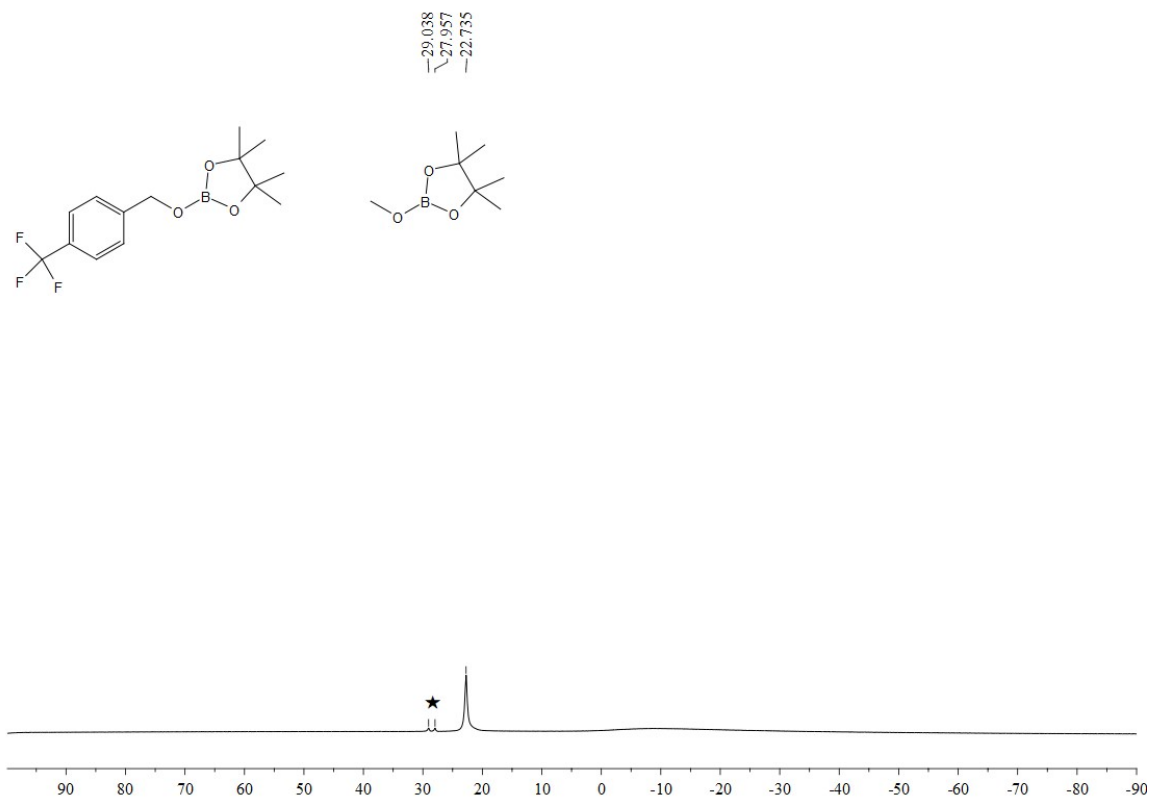

**Figure S33.** <sup>11</sup>B NMR spectrum (128 MHz, C<sub>6</sub>D<sub>6</sub>) of CF<sub>3</sub>PhCH<sub>2</sub>OBpin/MeOBpin (★ represents HBpin).

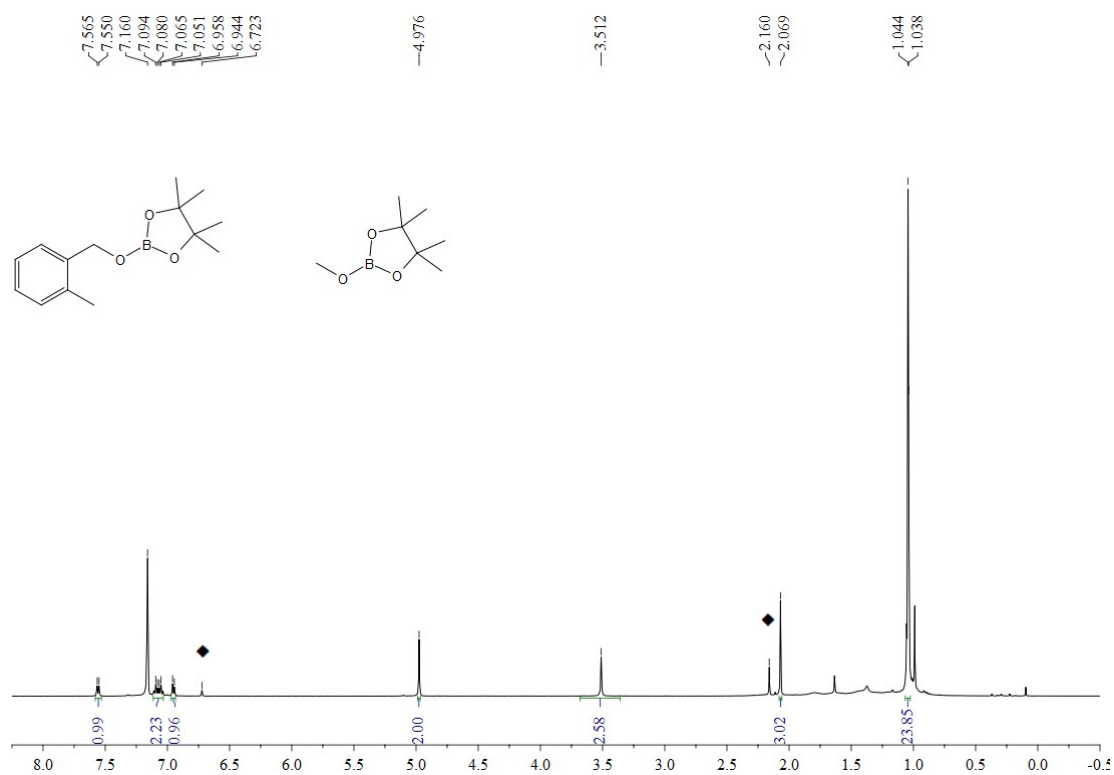

**Figure S34.** <sup>1</sup>H NMR spectrum (500 MHz, C<sub>6</sub>D<sub>6</sub>) of CH<sub>3</sub>PhCH<sub>2</sub>OBpin/MeOBpin. (◆ represents mesitylene)

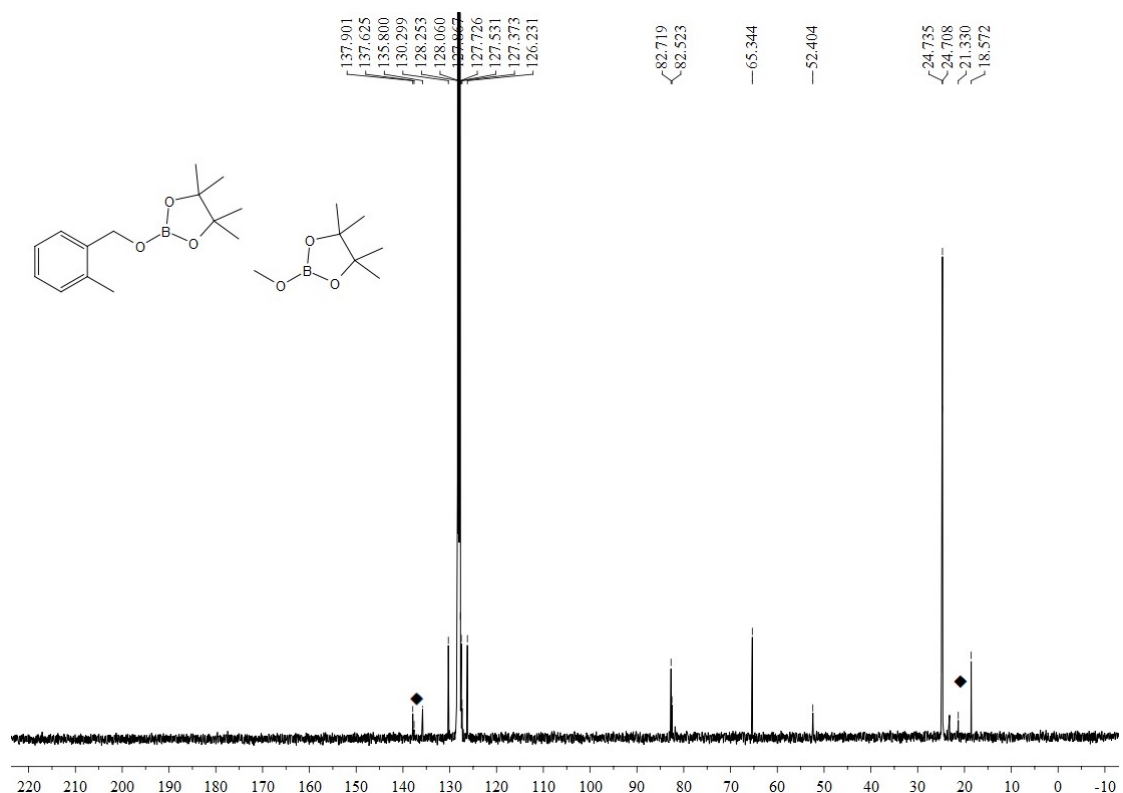

**Figure S35.** <sup>13</sup>C NMR spectrum (125 MHz, C<sub>6</sub>D<sub>6</sub>) of CH<sub>3</sub>PhCH<sub>2</sub>OBpin/MeOBpin. (◆ represents mesitylene).

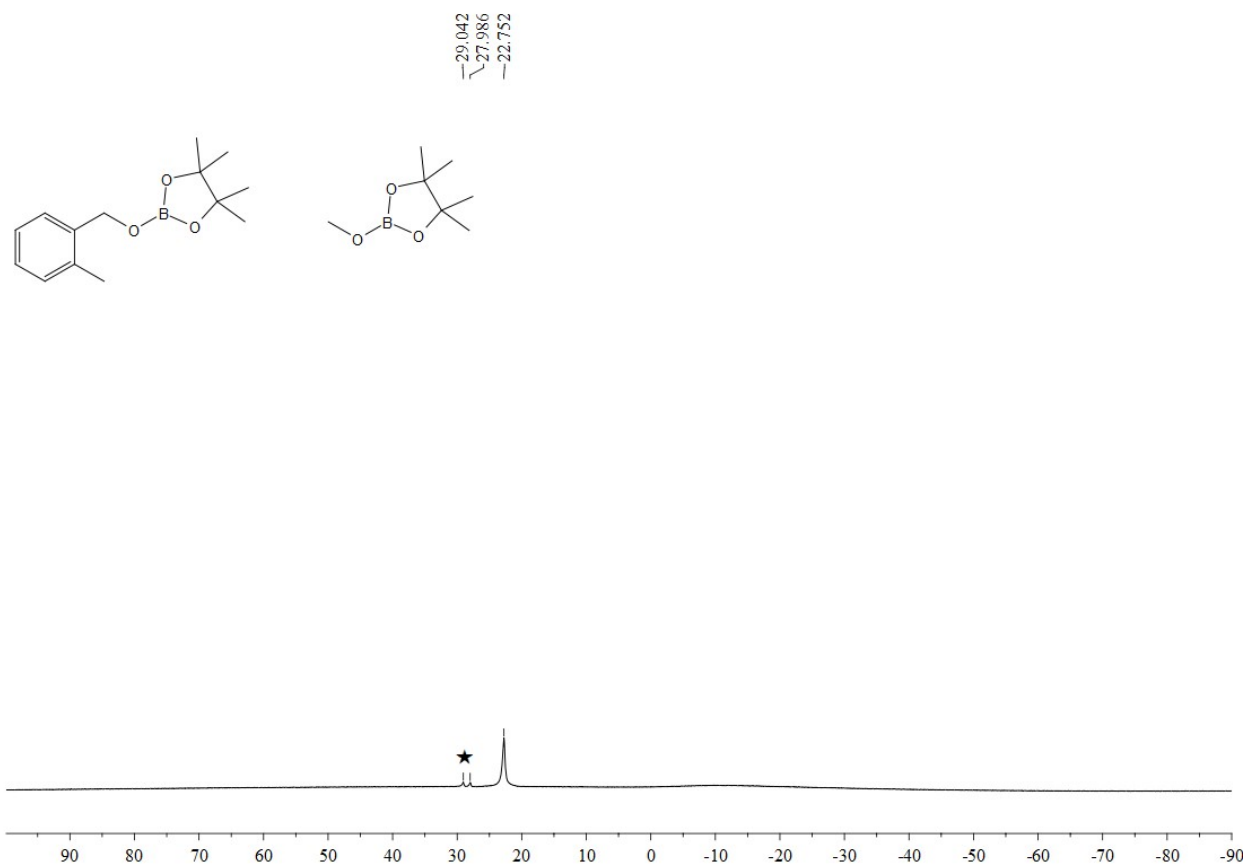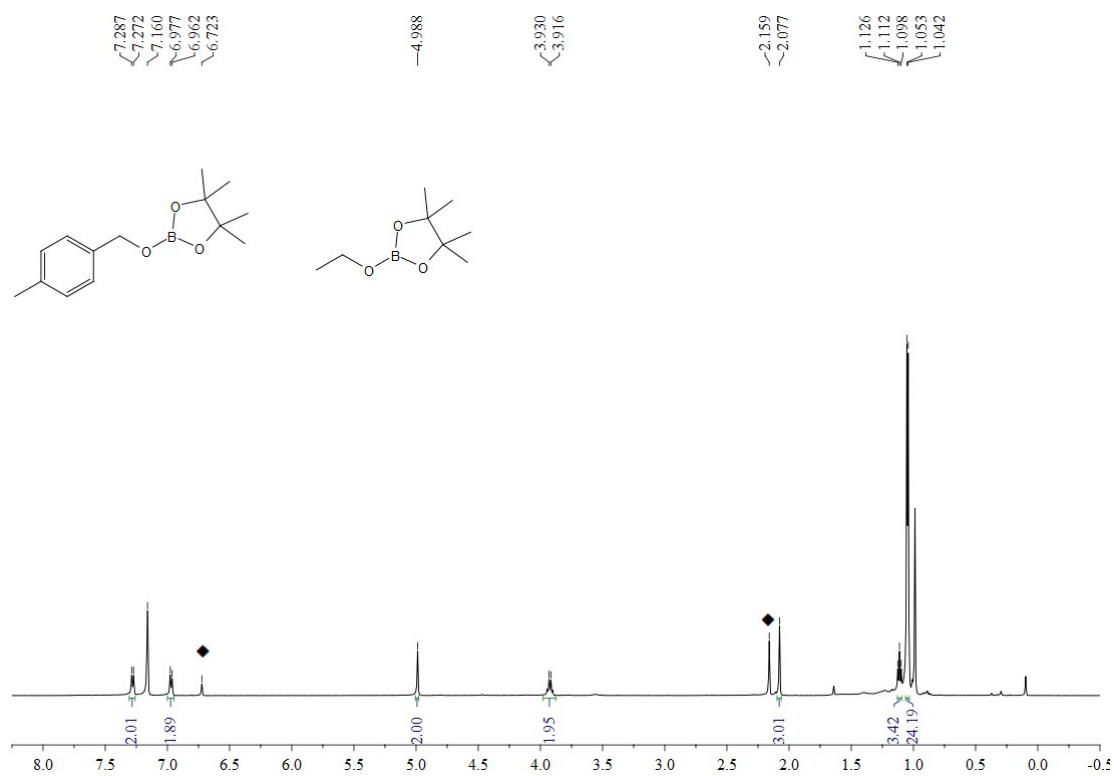

mesitylene)

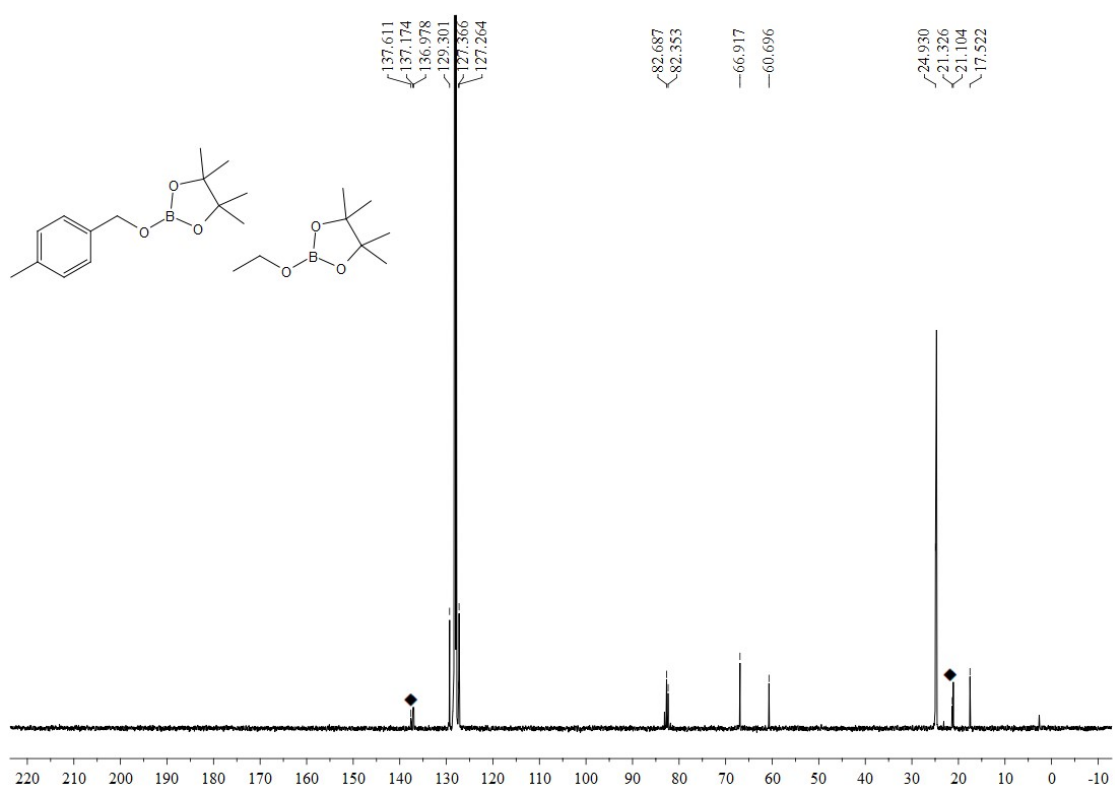

**Figure S38.** <sup>13</sup>C NMR spectrum (125 MHz, C<sub>6</sub>D<sub>6</sub>) of CH<sub>3</sub>PhCH<sub>2</sub>OBpin/EtOBpin (◆ represents mesitylene)

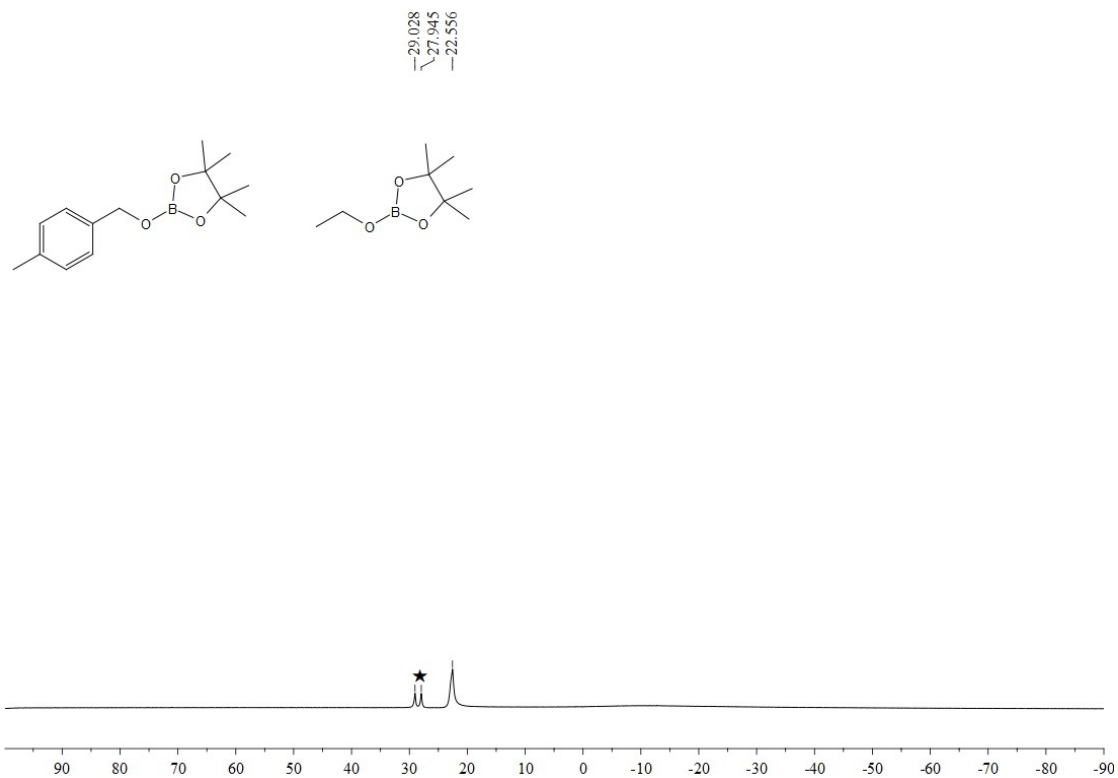

**Figure S39.** <sup>11</sup>B NMR spectrum (128 MHz, C<sub>6</sub>D<sub>6</sub>) of CH<sub>3</sub>PhCH<sub>2</sub>OBpin/MeOBpin (★ represents HBpin).

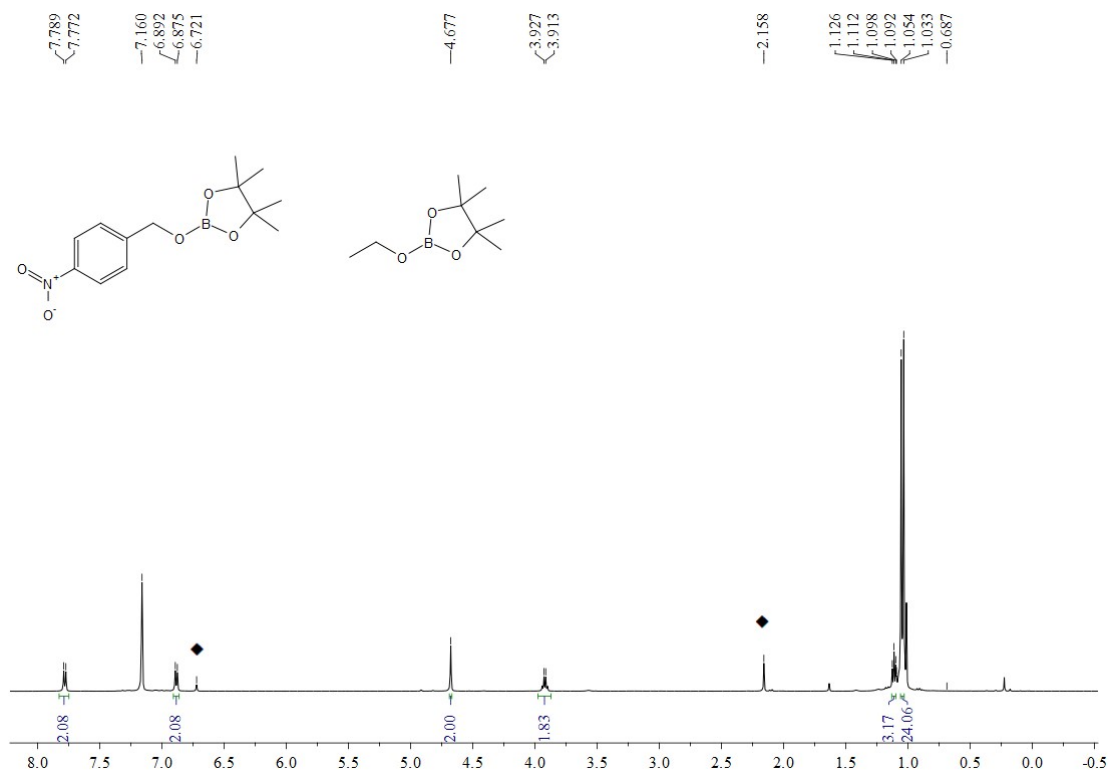

**Figure S40.**  $^1\text{H}$  NMR spectrum (500 MHz,  $\text{C}_6\text{D}_6$ ) of  $\text{NO}_2\text{PhCH}_2\text{OBpin}/\text{EtOBpin}$  (◆ represents mesitylene)

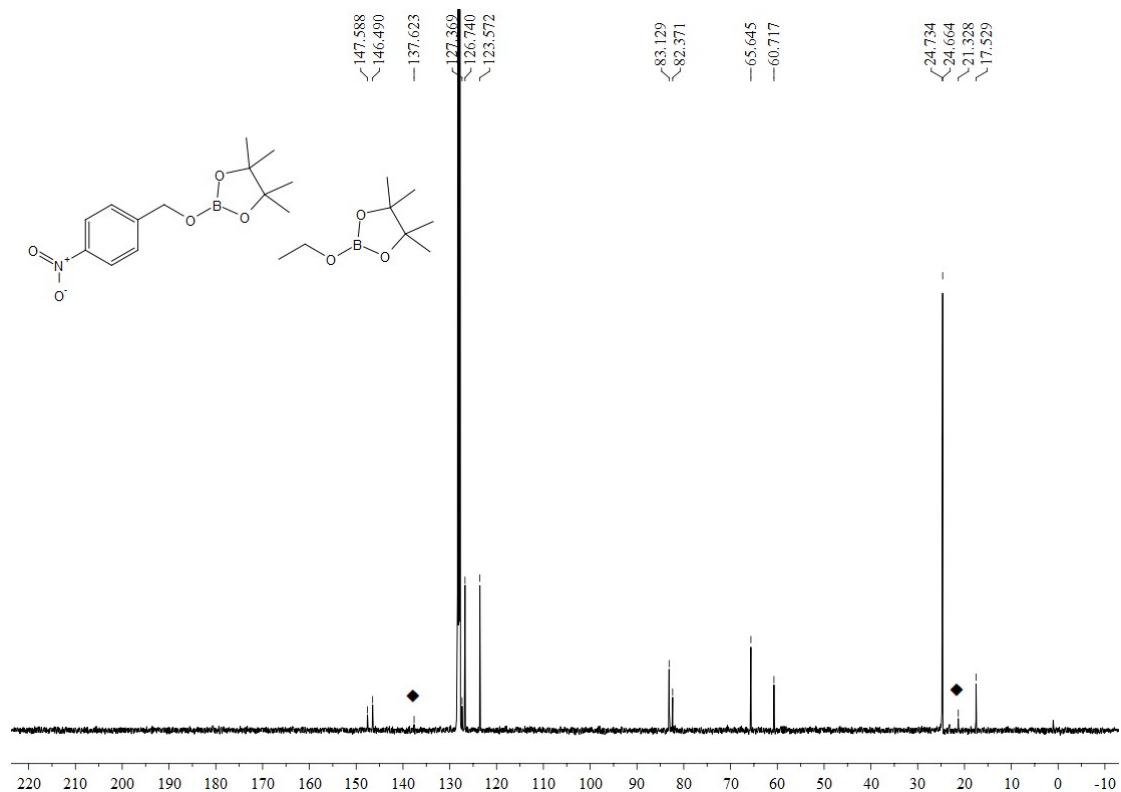

**Figure S41.**  $^{13}\text{C}$  NMR spectrum (125 MHz,  $\text{C}_6\text{D}_6$ ) of  $\text{NO}_2\text{PhCH}_2\text{OBpin}/\text{EtOBpin}$ . (◆ represents mesitylene).

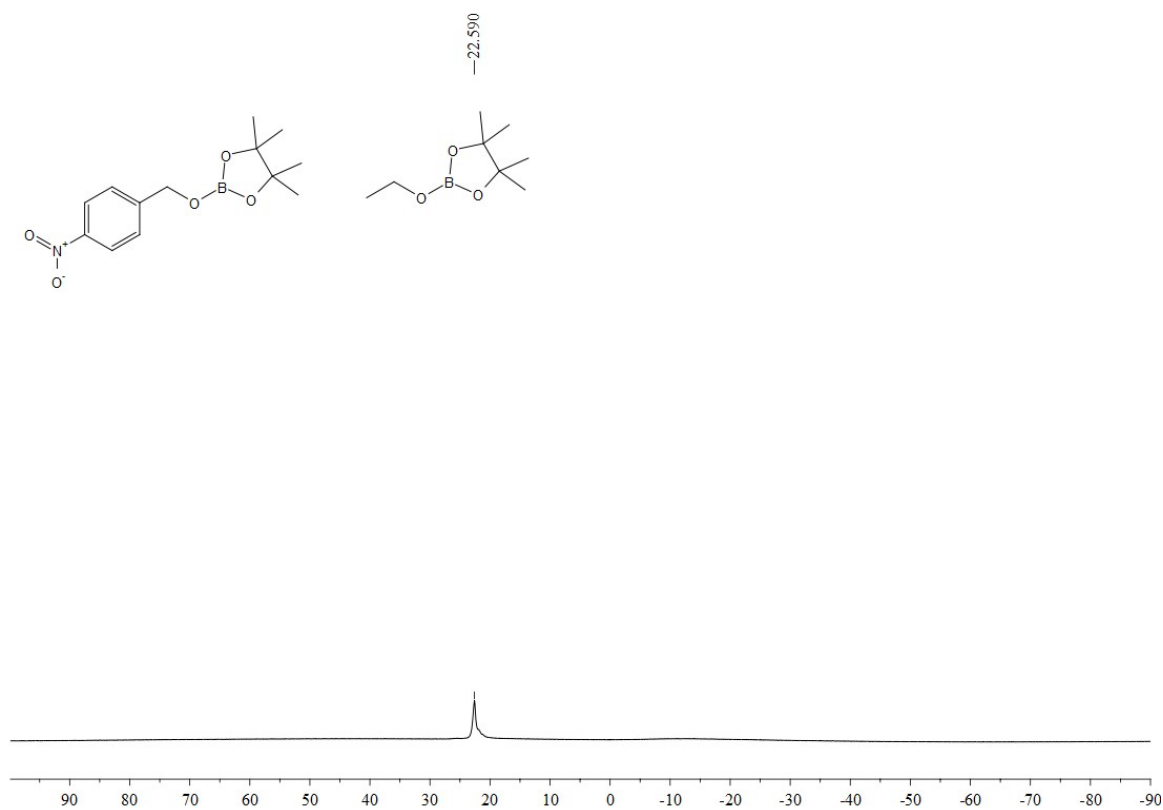

**Figure S42.** <sup>11</sup>B NMR spectrum (128 MHz, C<sub>6</sub>D<sub>6</sub>) of NO<sub>2</sub>PhCH<sub>2</sub>OBpin/EtOBpin (★ represents HBpin).

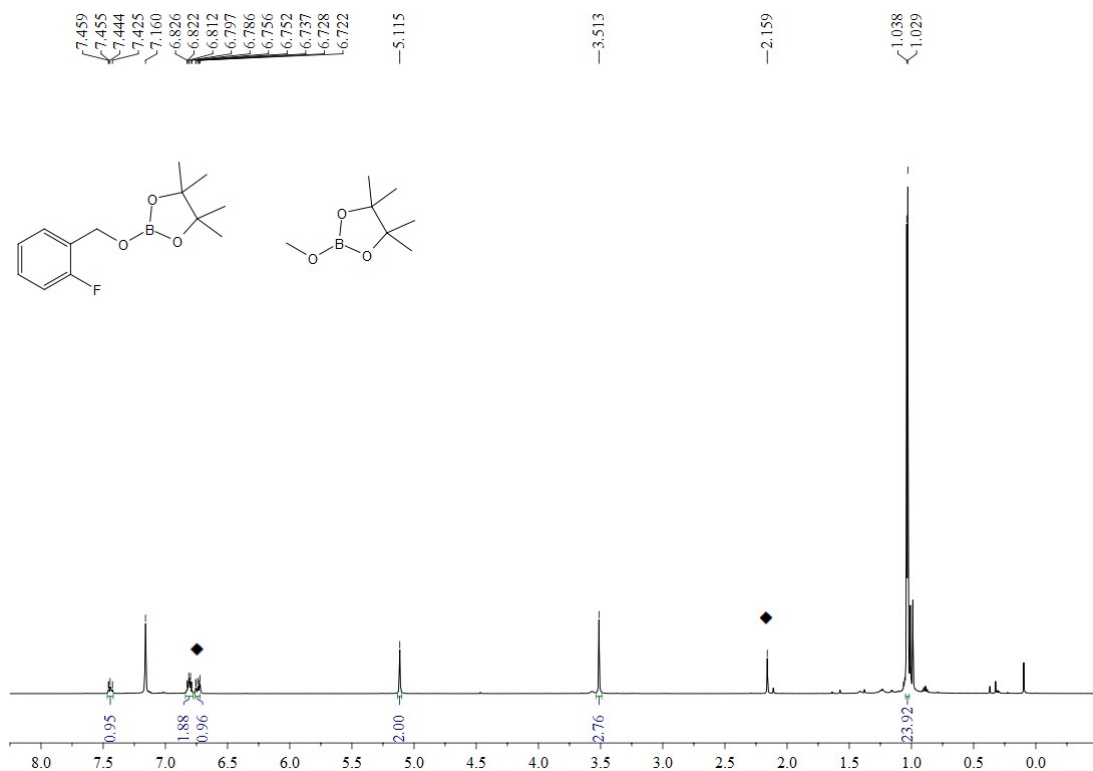

**Figure S43.** <sup>1</sup>H NMR spectrum (500 MHz, C<sub>6</sub>D<sub>6</sub>) of FPhCH<sub>2</sub>OBpin/MeOBpin (◆ represents mesitylene)

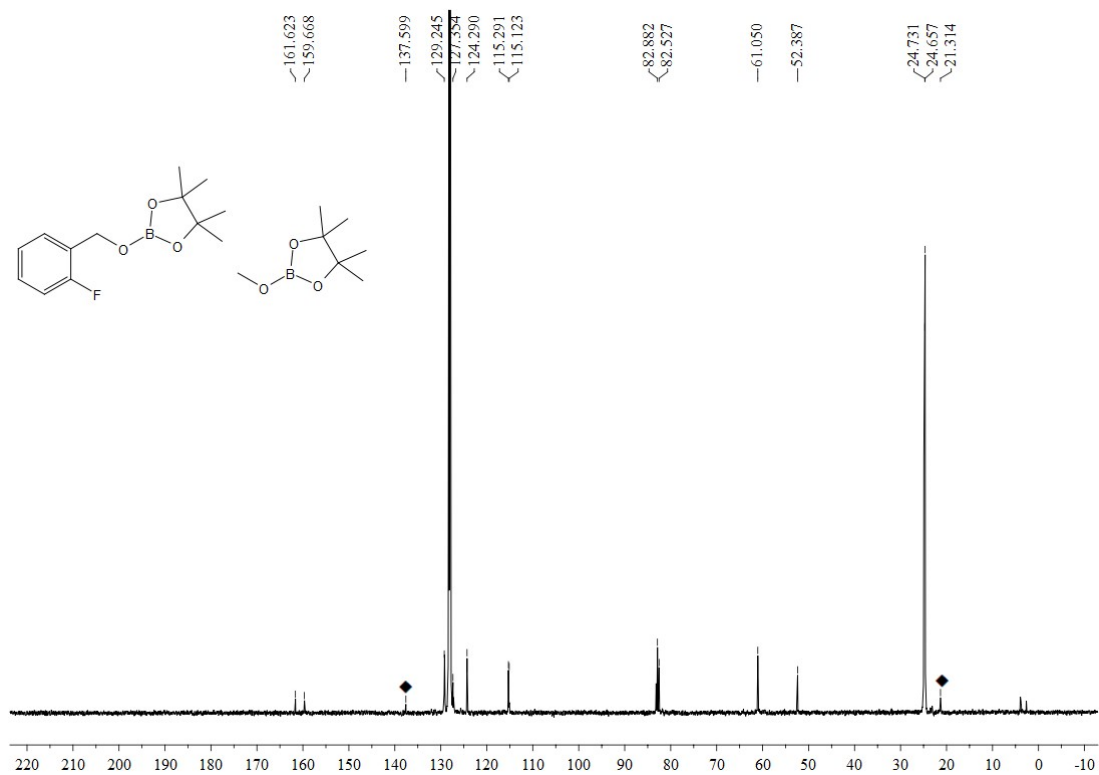

**Figure S44.**  $^{13}\text{C}$  NMR spectrum (125 MHz,  $\text{C}_6\text{D}_6$ ) of FPhCH<sub>2</sub>OBpin/MeOBpin (◆ represents mesitylene).

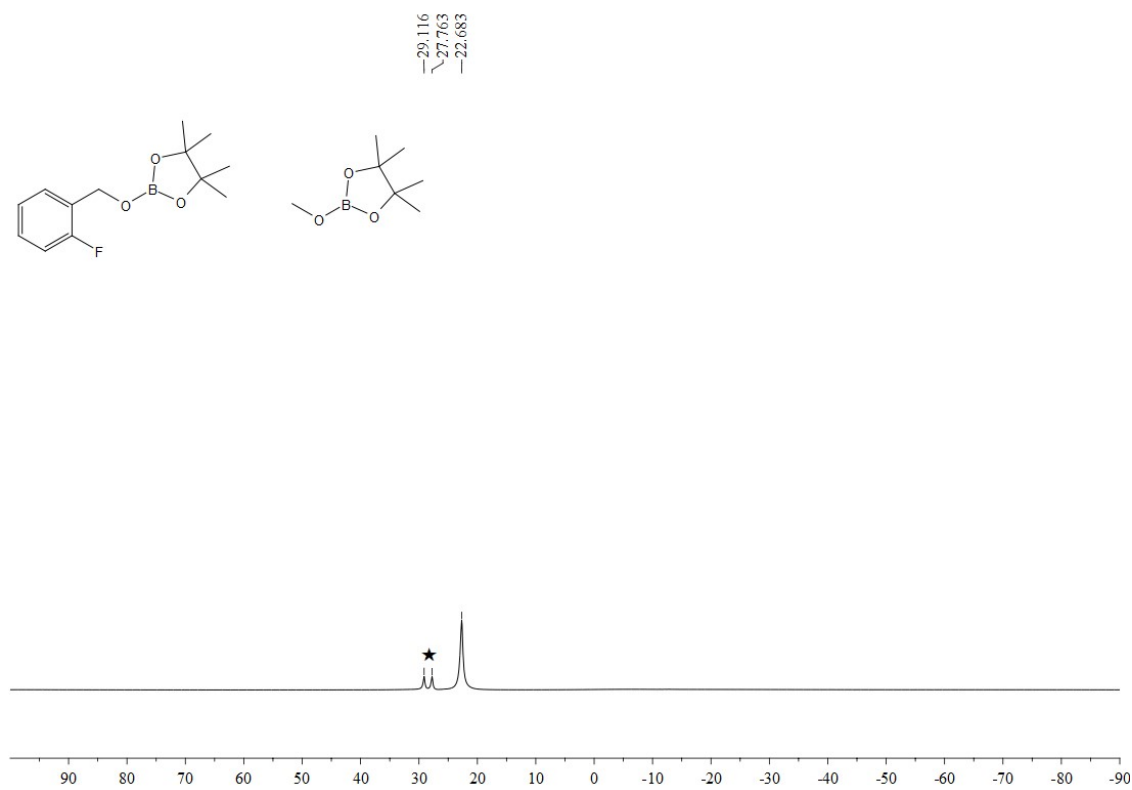

**Figure S45.**  $^{11}\text{B}$  NMR spectrum (128 MHz,  $\text{C}_6\text{D}_6$ ) of FPhCH<sub>2</sub>OBpin/MeOBpin (★ represents HBpin).



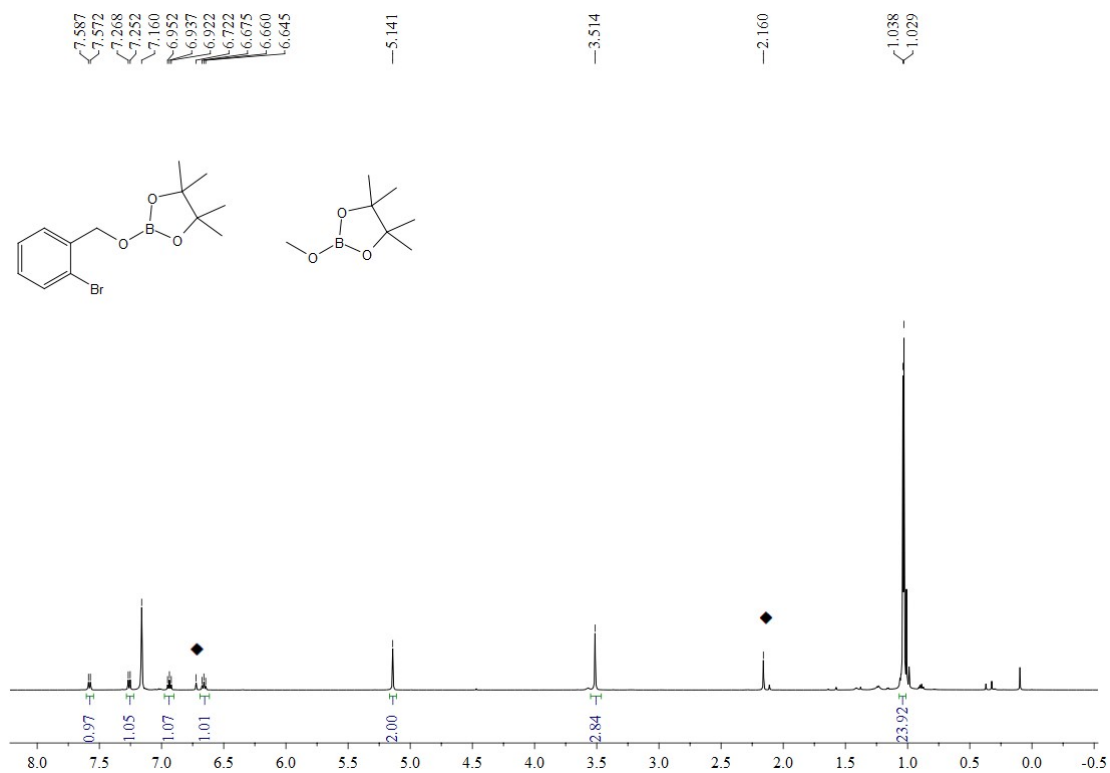

**Figure S46.** <sup>1</sup>H NMR spectrum (500 MHz, C<sub>6</sub>D<sub>6</sub>) of BrPhCH<sub>2</sub>OBpin/MeOBpin (◆ represents mesitylene)

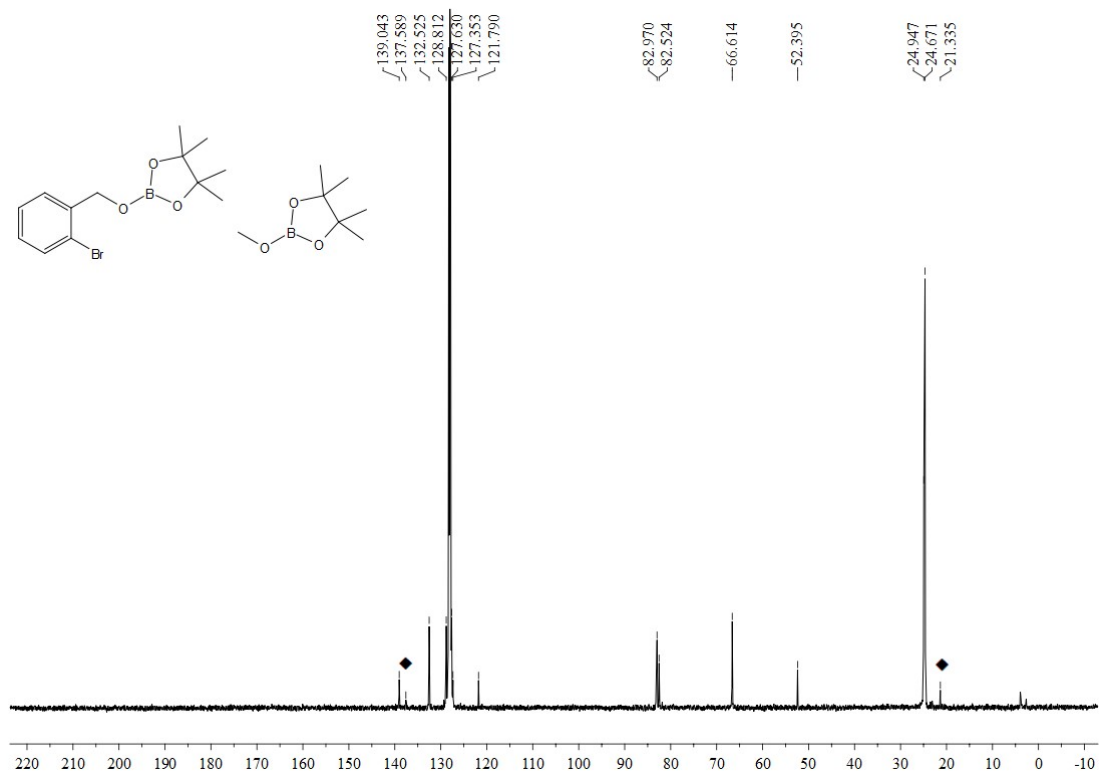

**Figure S47.** <sup>13</sup>C NMR spectrum (125 MHz, C<sub>6</sub>D<sub>6</sub>) of BrPhCH<sub>2</sub>OBpin/MeOBpin (◆ represents mesitylene).

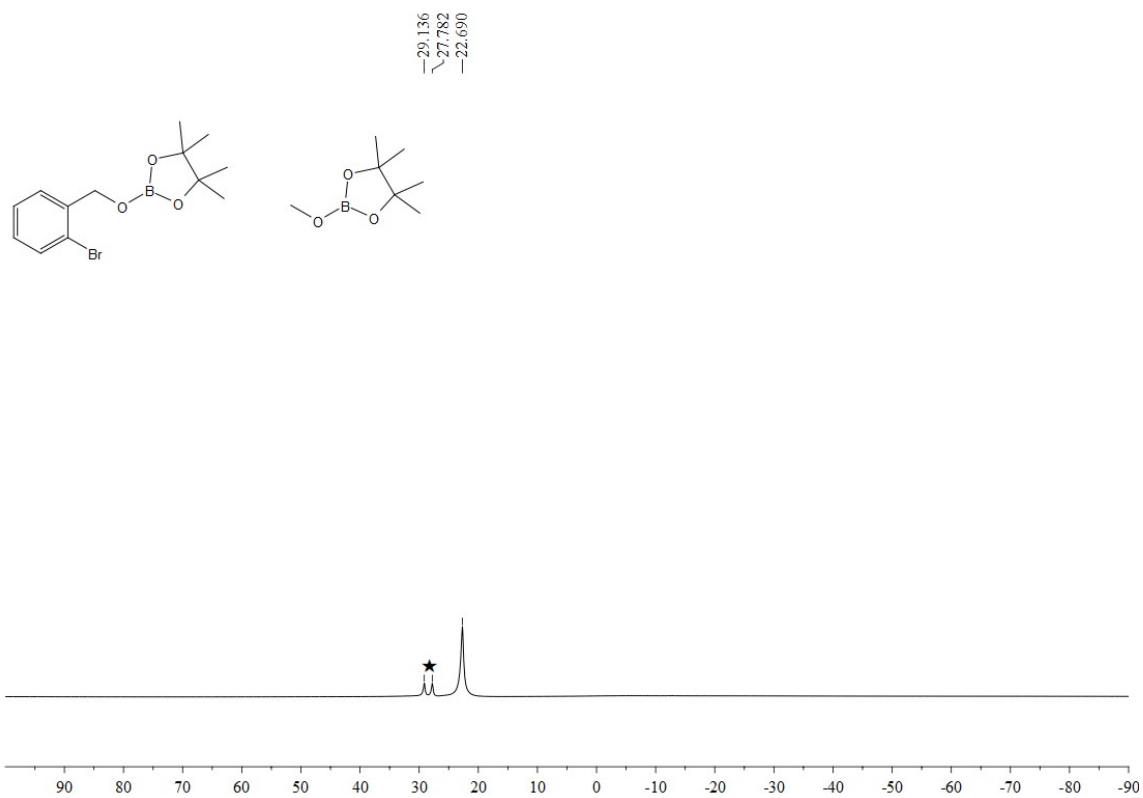

**Figure S48.** <sup>11</sup>B NMR spectrum (128 MHz, C<sub>6</sub>D<sub>6</sub>) of BrPhCH<sub>2</sub>OBpin/MeOBpin (★ represents HBpin).

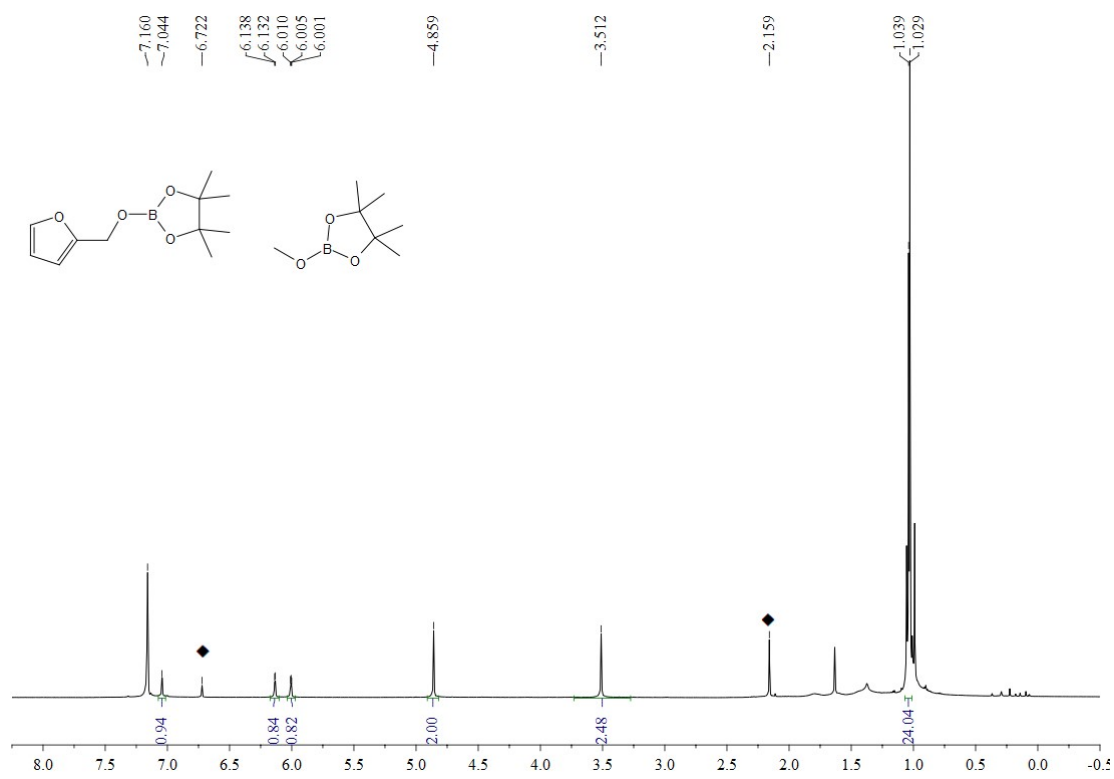

**Figure S49.** <sup>1</sup>H NMR spectrum (500 MHz, C<sub>6</sub>D<sub>6</sub>) of 2-furan-CH<sub>2</sub>OBpin/MeOBpin (◆ represents mesitylene)

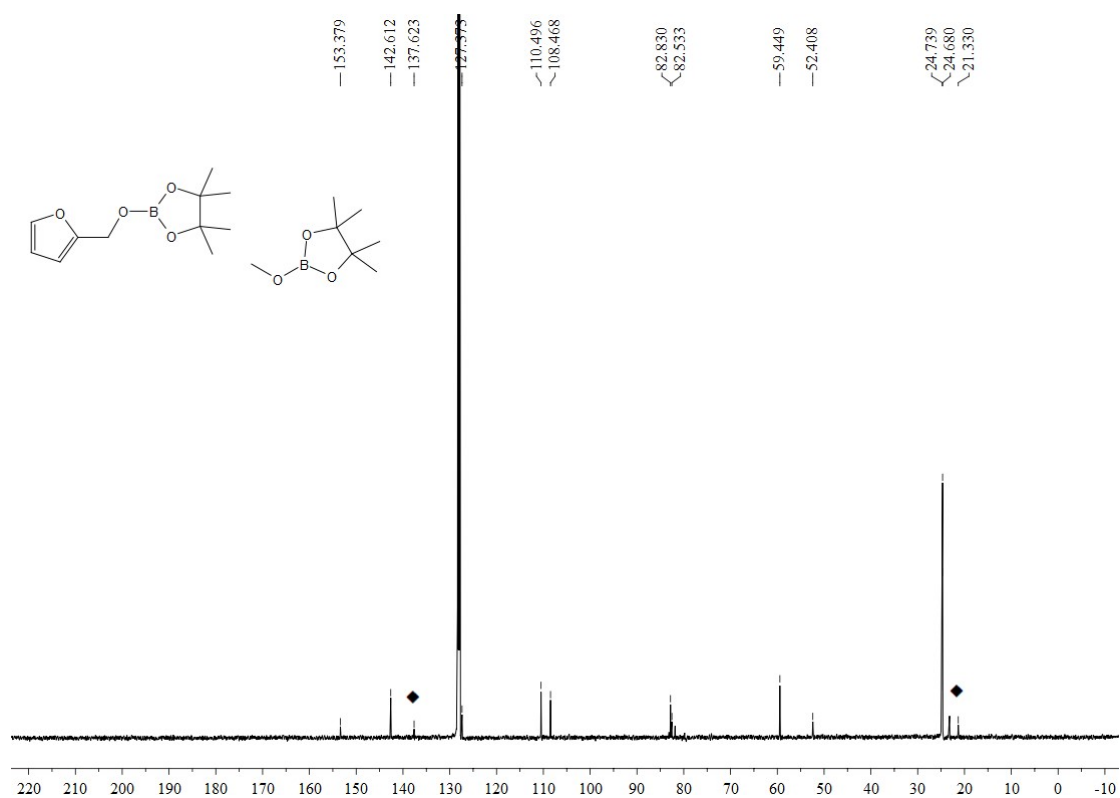

**Figure S50.**  $^{13}\text{C}$  NMR spectrum (125 MHz,  $\text{C}_6\text{D}_6$ ) of 2-furan- $\text{CH}_2\text{OBpin/MeOBpin}$  (◆ represents mesitylene).

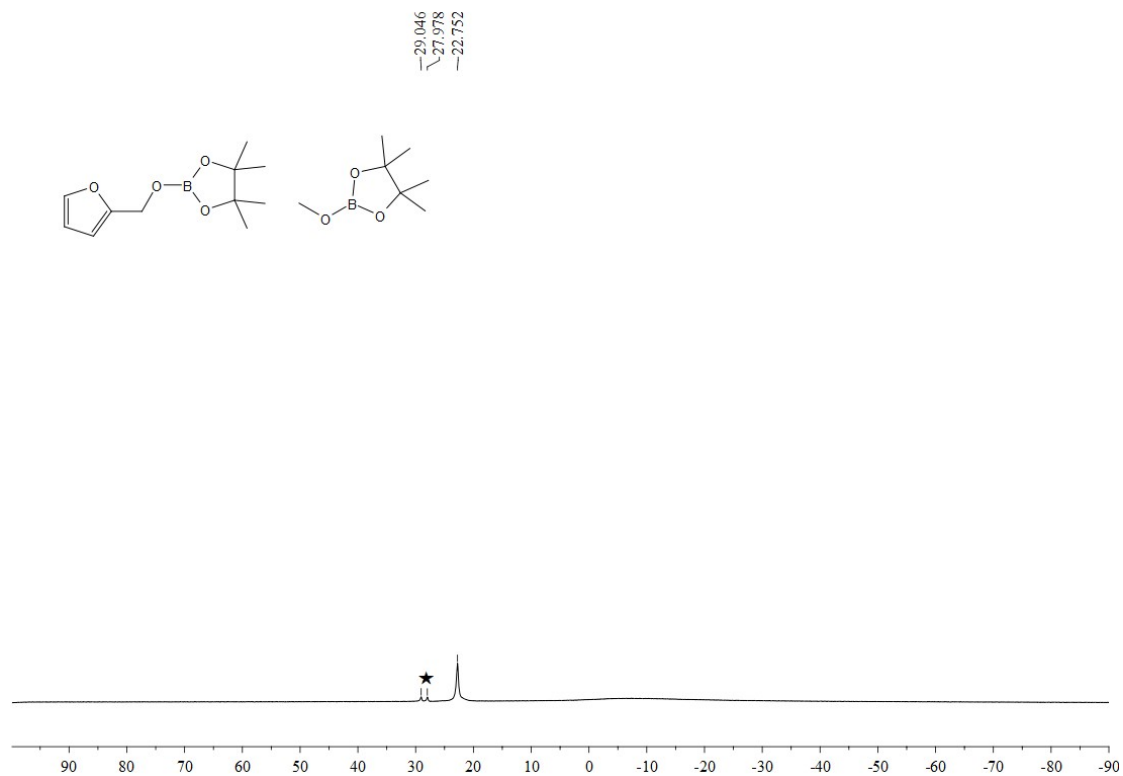

**Figure S51.**  $^{11}\text{B}$  NMR spectrum (128 MHz,  $\text{C}_6\text{D}_6$ ) of 2-furan- $\text{CH}_2\text{OBpin/MeOBpin}$  (★ represents HBpin).

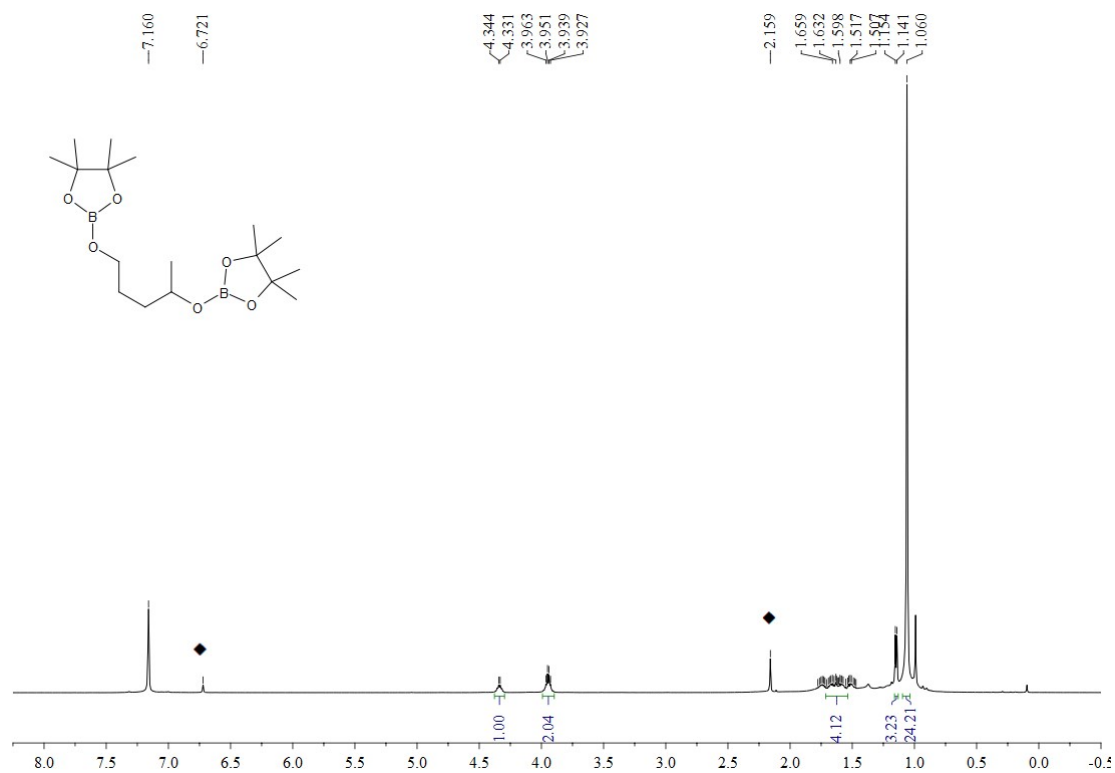

**Figure S52.**  $^1\text{H}$  NMR spectrum (500 MHz,  $\text{C}_6\text{D}_6$ ) of  $\text{BpinO}(\text{CH}_2)_3\text{CMeOBpin}$  (◆ represents mesitylene)

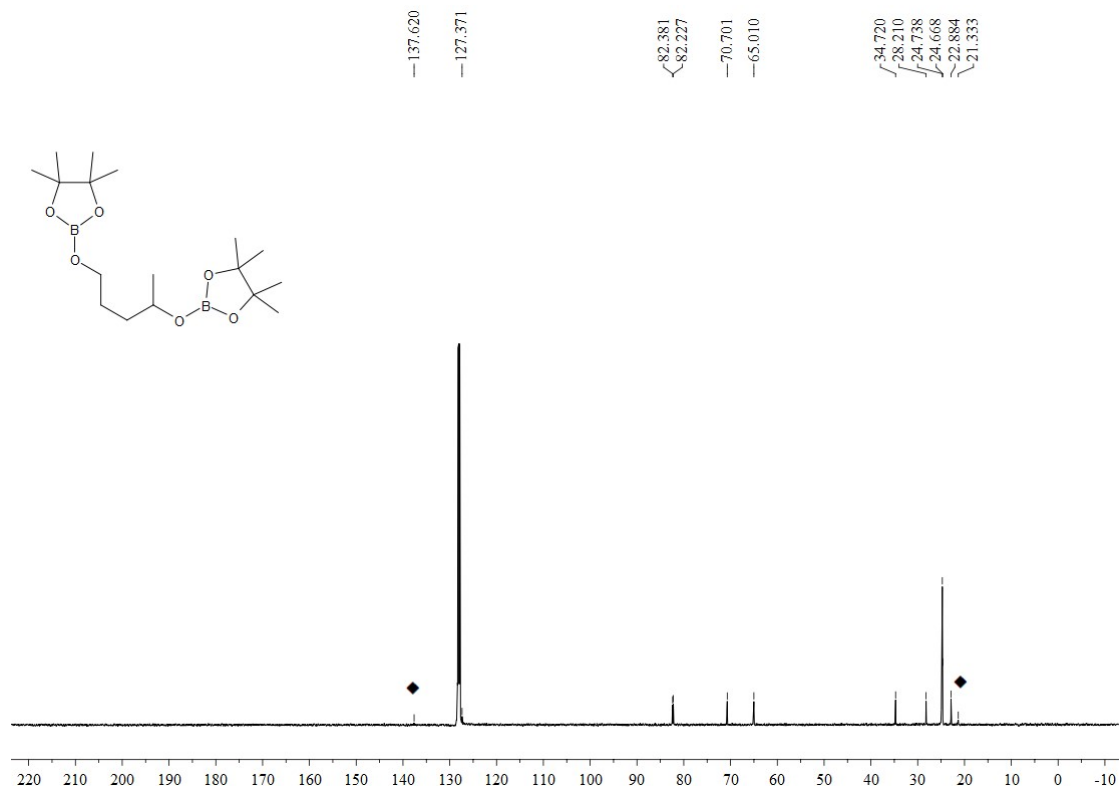

**Figure S53.**  $^{13}\text{C}$  NMR spectrum (125 MHz,  $\text{C}_6\text{D}_6$ ) of  $\text{BpinO}(\text{CH}_2)_3\text{CMeOBpin}$  (◆ represents mesitylene).

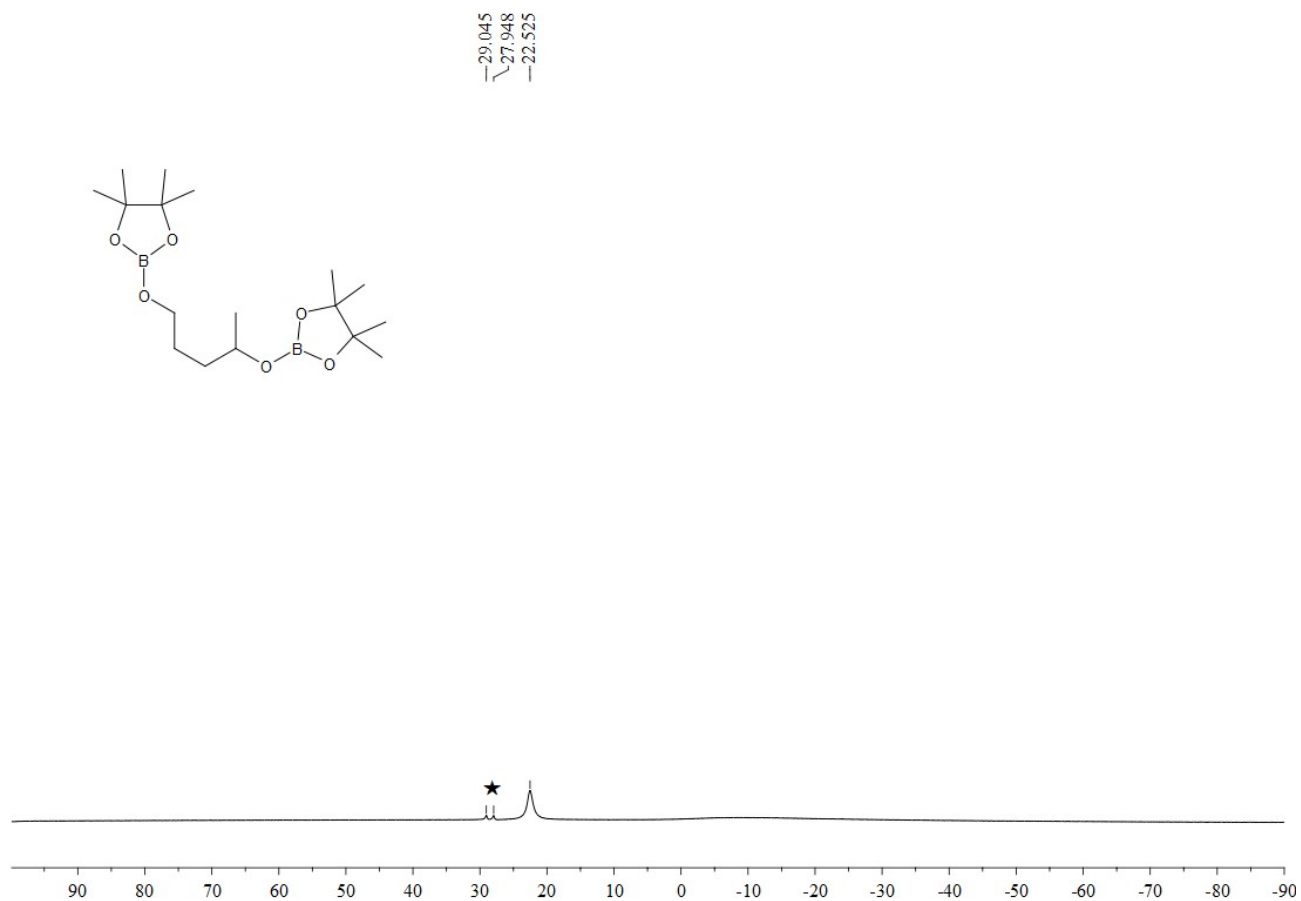

**Figure S54.**  $^{11}\text{B}$  NMR spectrum (128 MHz,  $\text{C}_6\text{D}_6$ ) of pinBO(CH<sub>2</sub>)<sub>3</sub>CMeOBpin (★ represents HBpin).

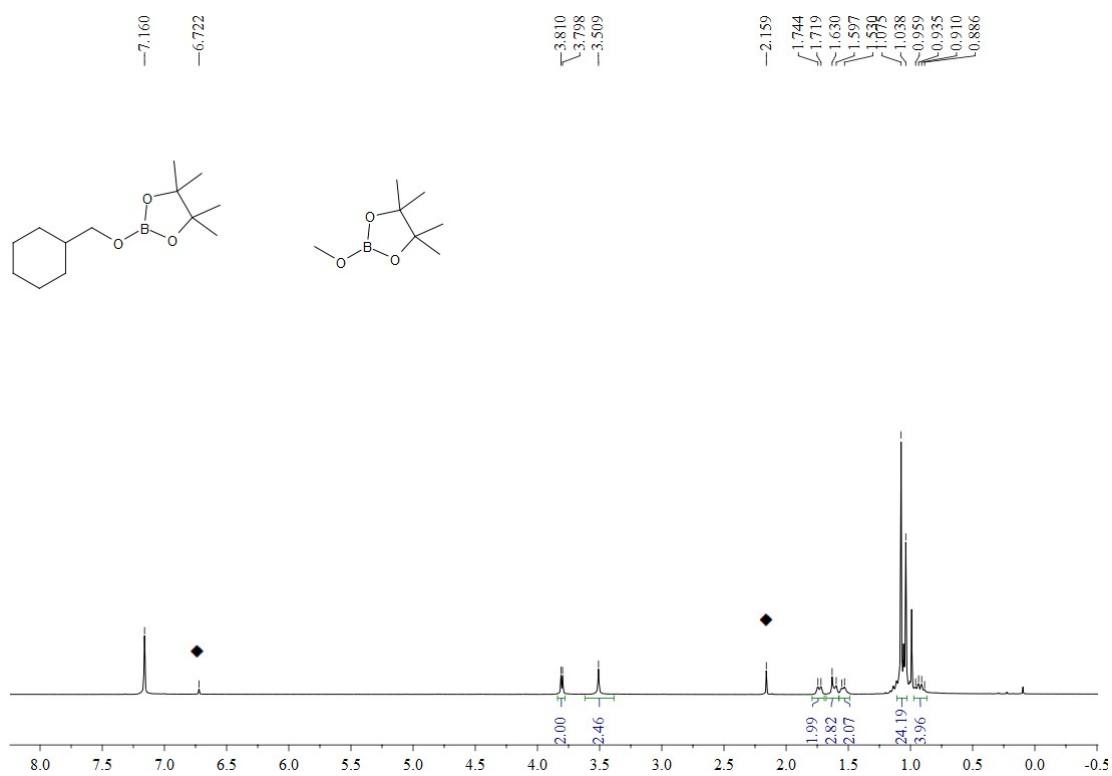

**Figure S55.**  $^1\text{H}$  NMR spectrum (500 MHz,  $\text{C}_6\text{D}_6$ ) of CyCH<sub>2</sub>OBpin/MeOBpin (♦ represents)

mesitylene)

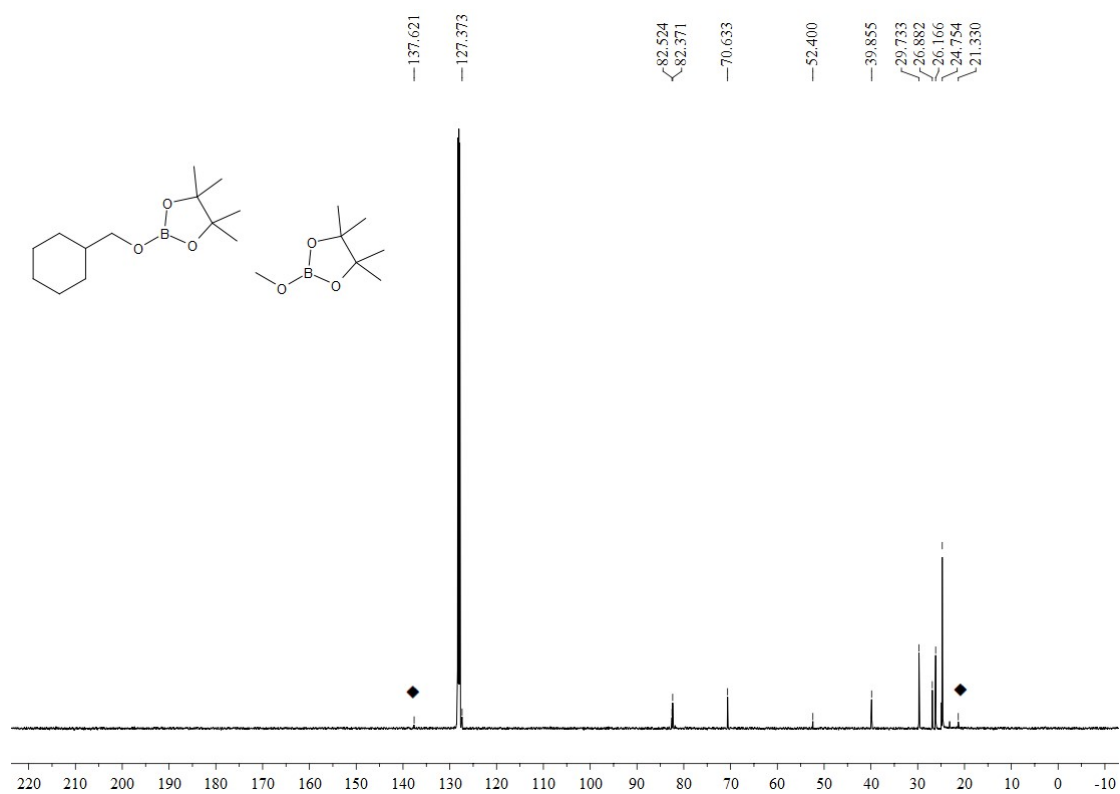

**Figure S56.** <sup>13</sup>C NMR spectrum (125 MHz, C<sub>6</sub>D<sub>6</sub>) of CyCH<sub>2</sub>OBpin/MeOBpin (◆ represents mesitylene).

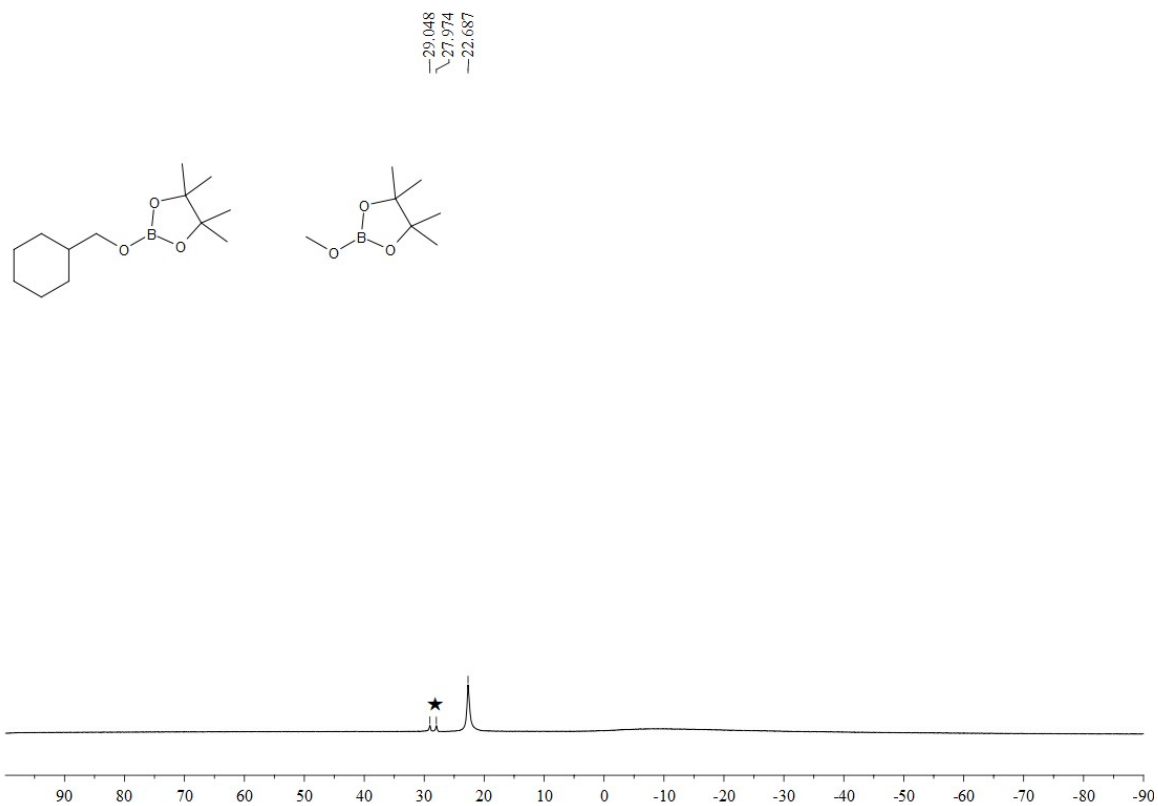

**Figure S57.** <sup>11</sup>B NMR spectrum (128 MHz, C<sub>6</sub>D<sub>6</sub>) of pinBO(CH<sub>2</sub>)<sub>3</sub>CMeOBpin (★ represents HBpin).

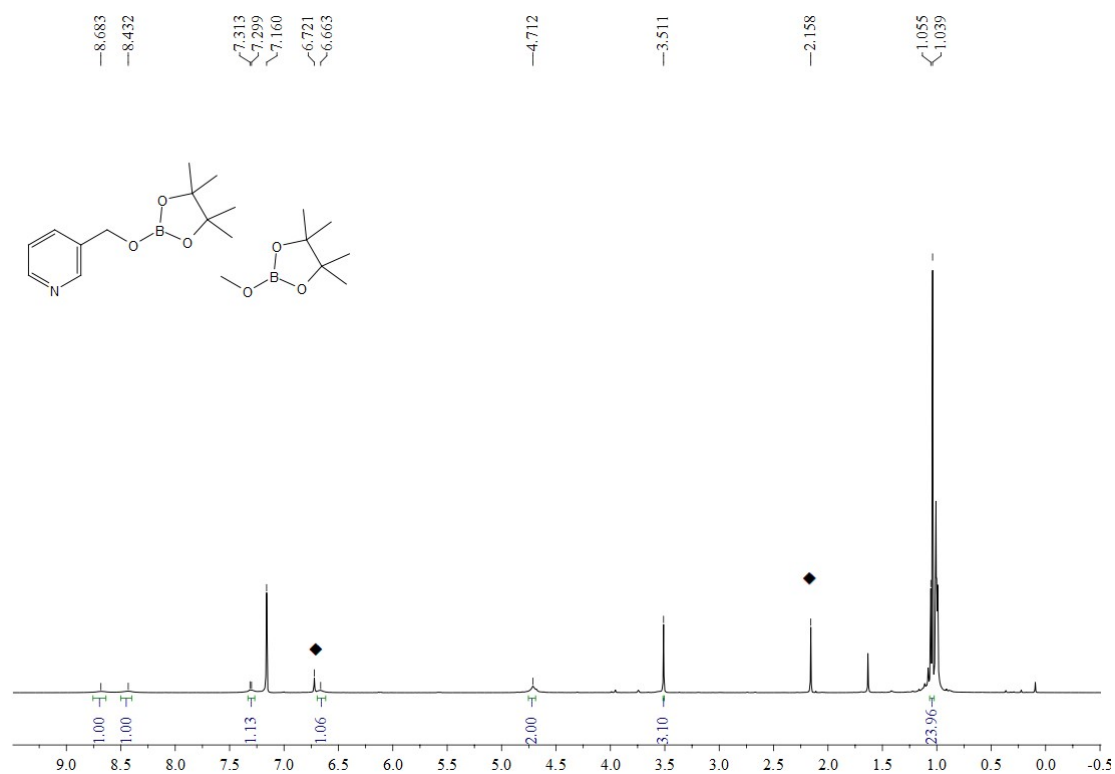

**Figure S58.**  $^1\text{H}$  NMR spectrum (500 MHz,  $\text{C}_6\text{D}_6$ ) of  $\text{PyCH}_2\text{OBpin/MeOBpin}$  (◆ represents mesitylene)

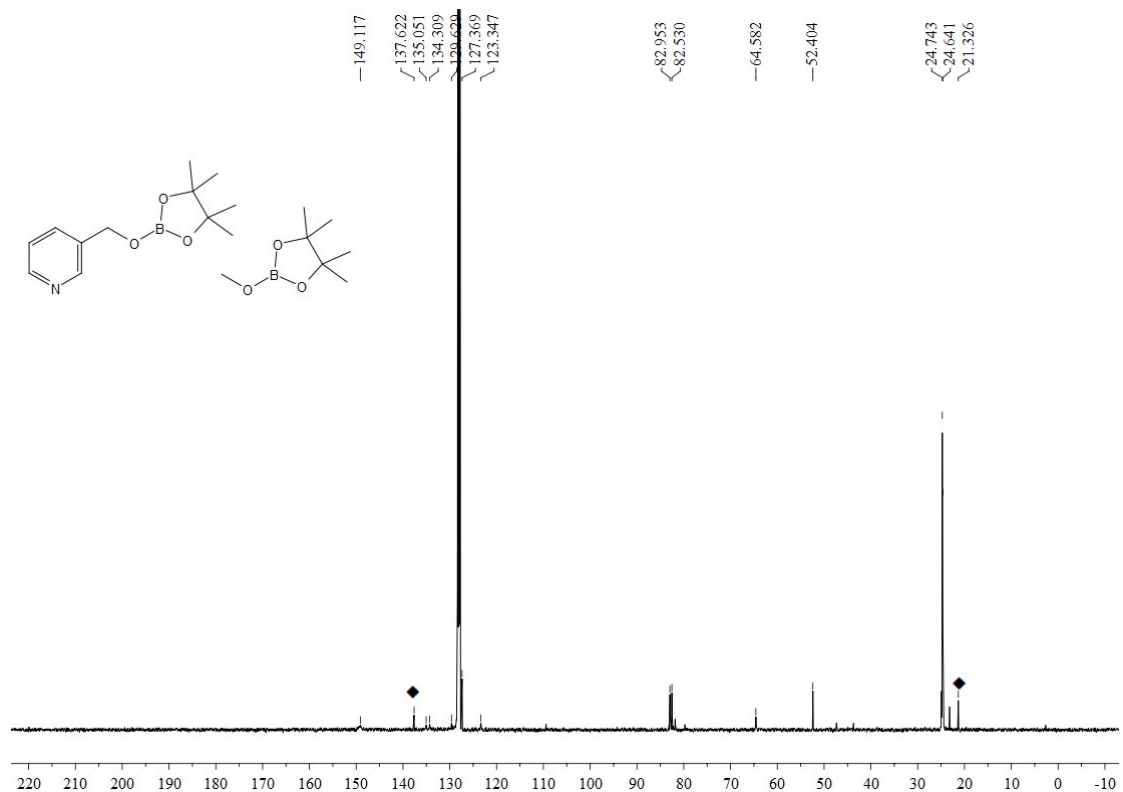

**Figure S59.**  $^{13}\text{C}$  NMR spectrum (125 MHz,  $\text{C}_6\text{D}_6$ ) of  $\text{PyCH}_2\text{OBpin/MeOBpin}$  (◆ represents mesitylene).

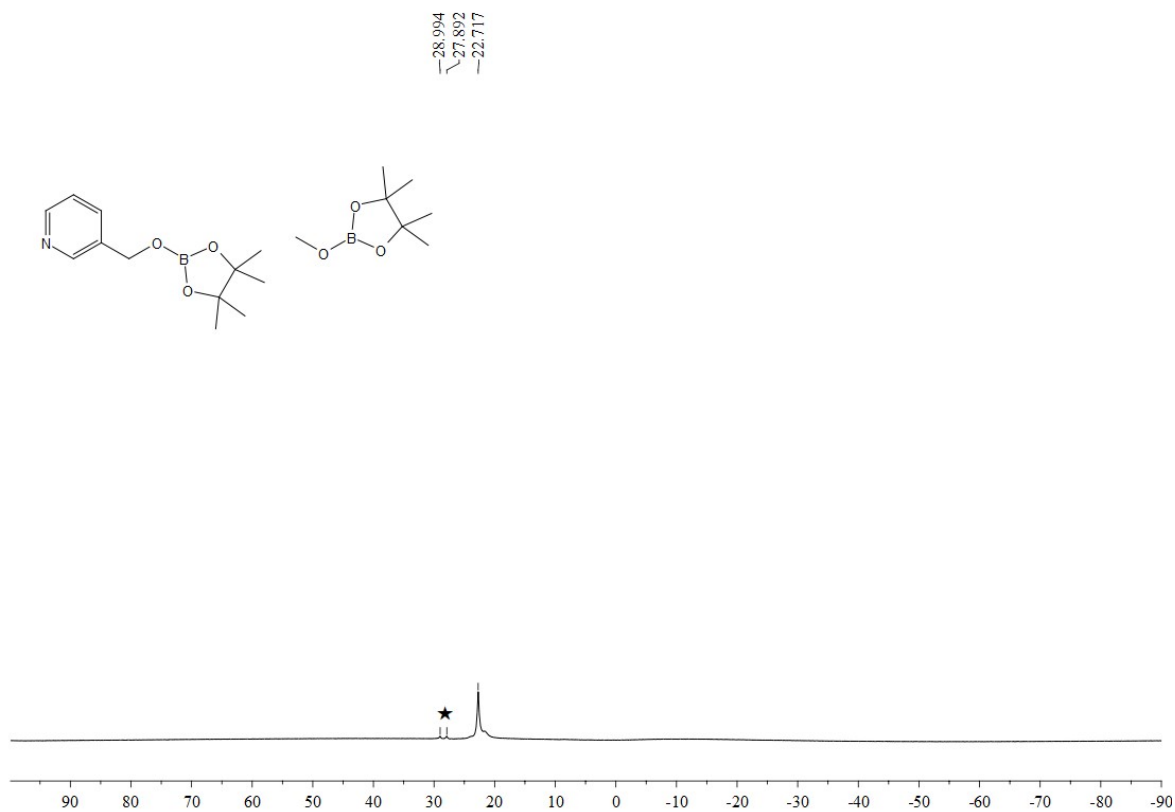

**Figure S60.** <sup>11</sup>B NMR spectrum (128 MHz, C<sub>6</sub>D<sub>6</sub>) of PyCH<sub>2</sub>OBpin/MeOBpin (★ represents HBpin).

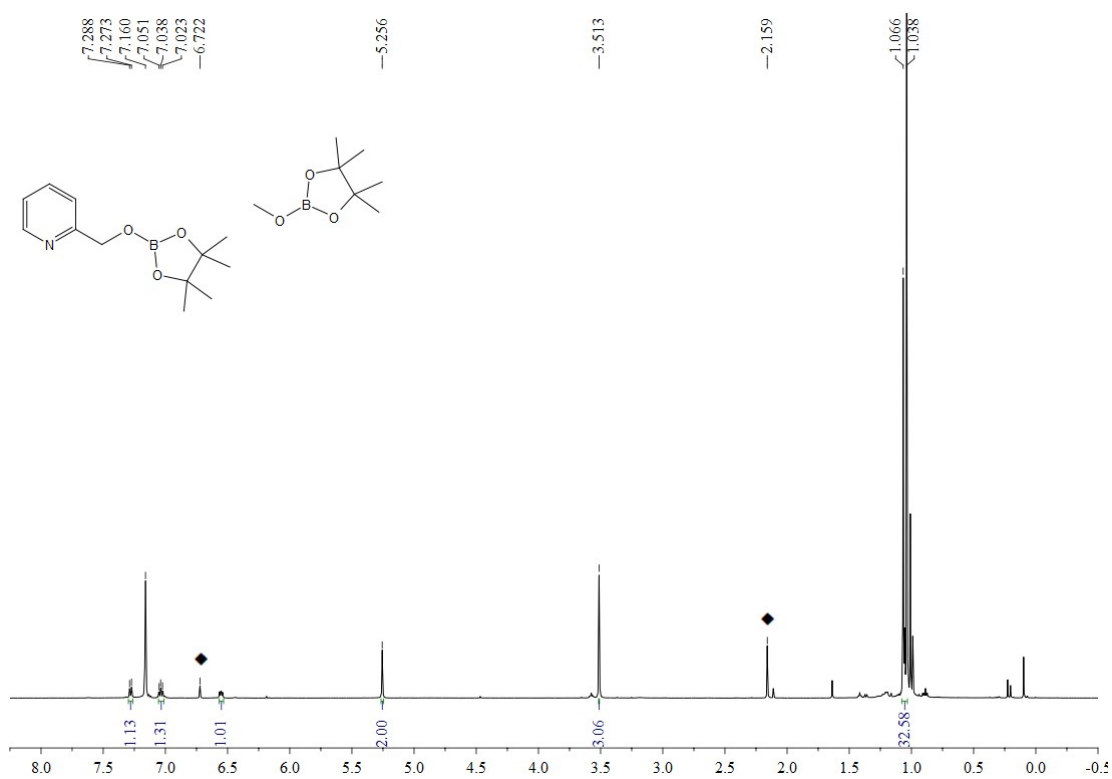

**Figure S61.** <sup>1</sup>H NMR spectrum (500 MHz, C<sub>6</sub>D<sub>6</sub>) of PyCH<sub>2</sub>OBpin/MeOBpin (◆ represents mesitylene)



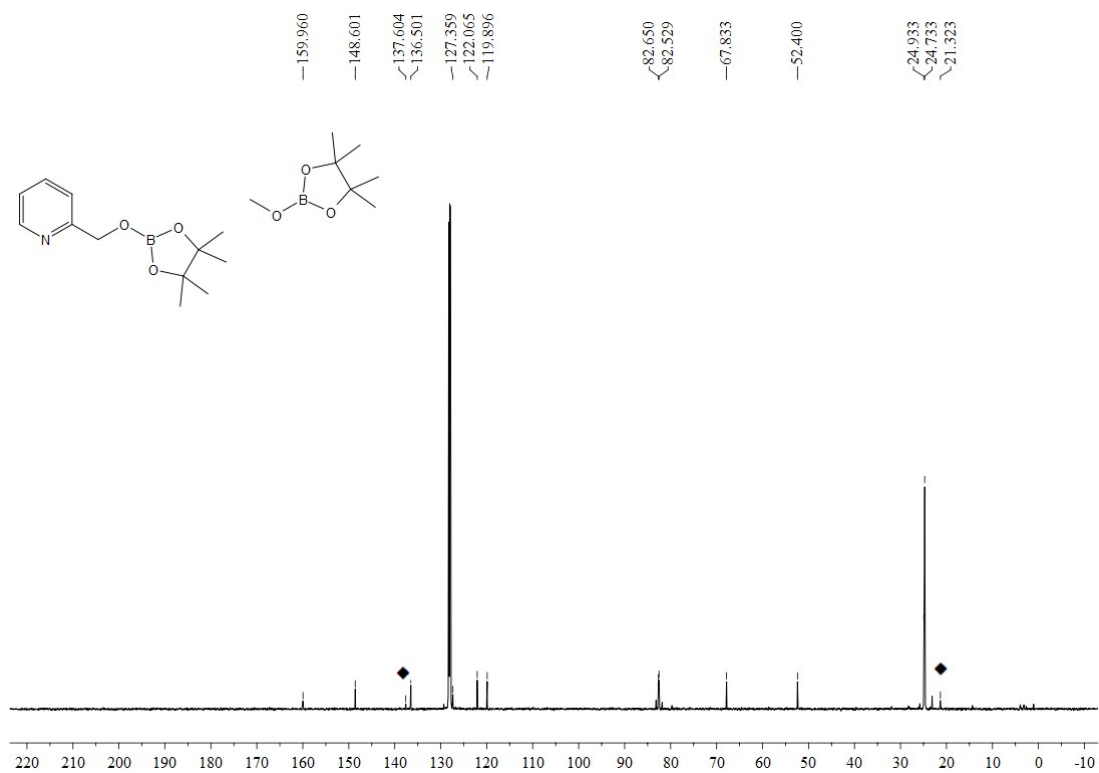

**Figure S62.**  $^{13}\text{C}$  NMR spectrum (125 MHz,  $\text{C}_6\text{D}_6$ ) of  $\text{PyCH}_2\text{OBpin/MeOBpin}$  (♦ represents mesitylene).

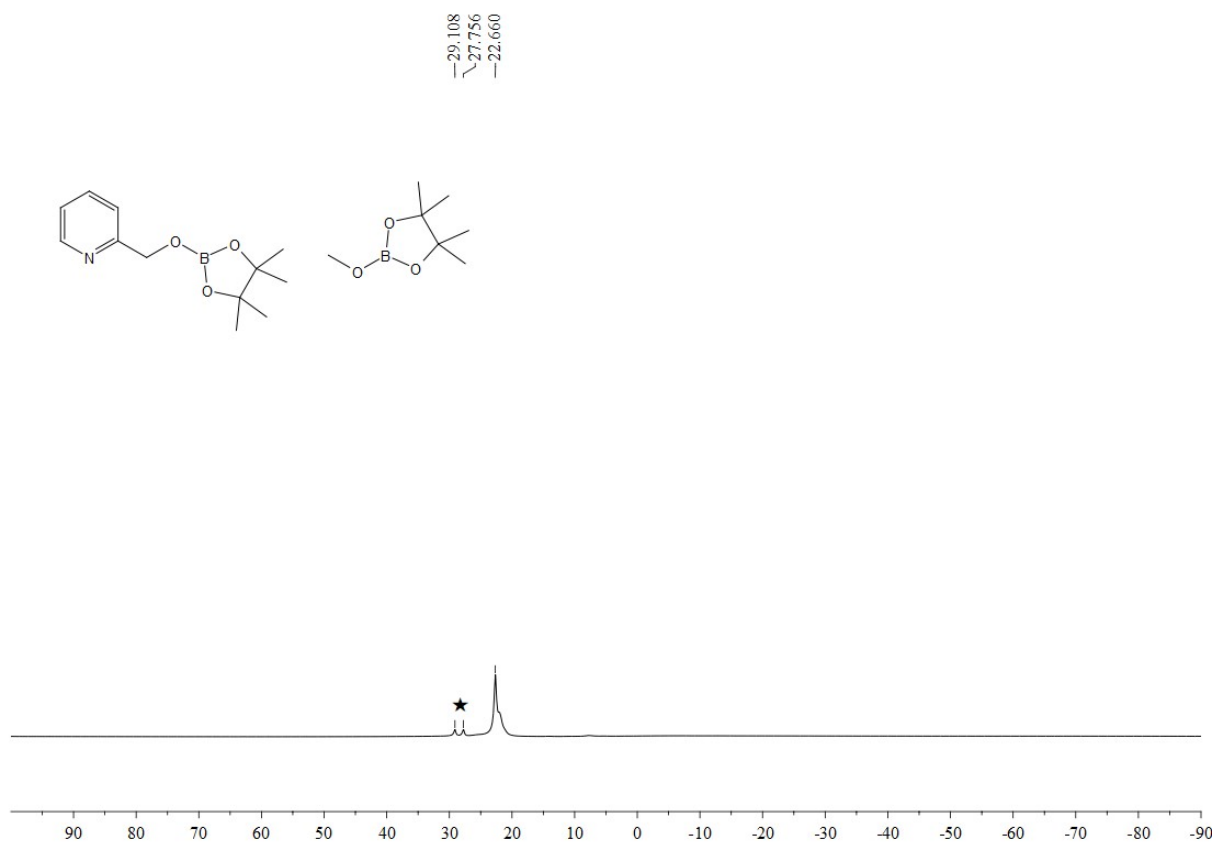

**Figure S63.**  $^{11}\text{B}$  NMR spectrum (128 MHz,  $\text{C}_6\text{D}_6$ ) of  $\text{PyCH}_2\text{OBpin/MeOBpin}$  (★ represents HBpin).

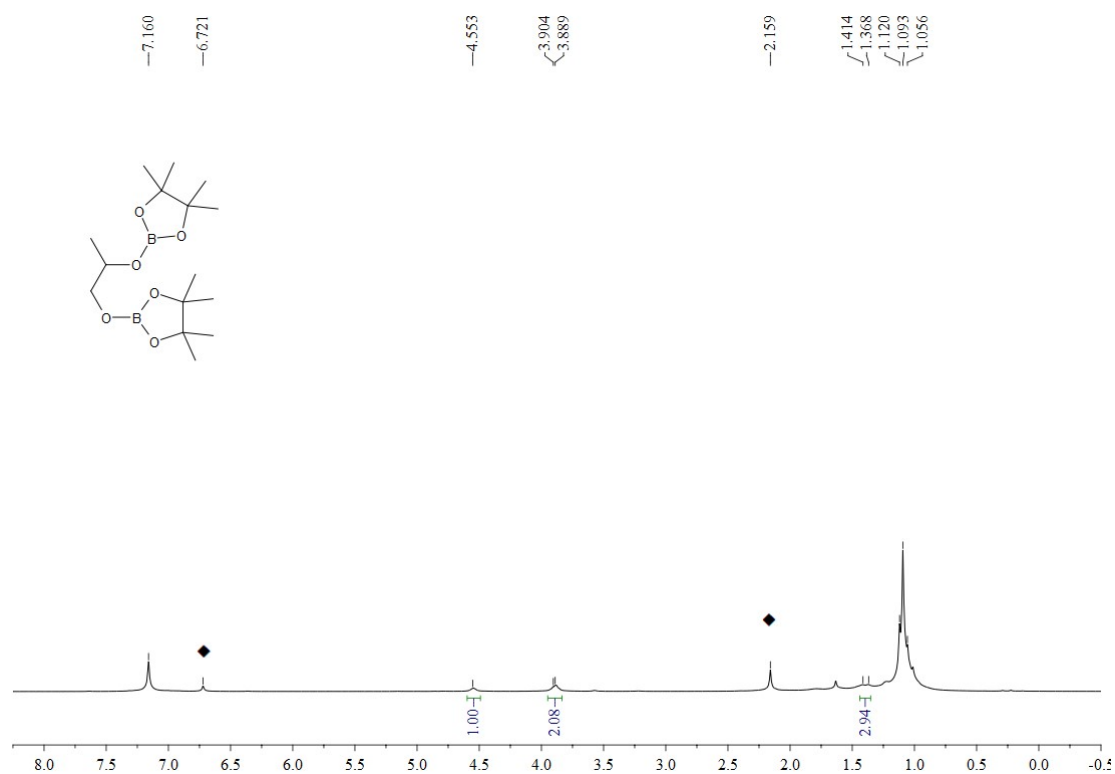

**Figure S64.** <sup>1</sup>H NMR spectrum (500 MHz, C<sub>6</sub>D<sub>6</sub>) of pinBOCH<sub>2</sub>CMeOBpin (◆ represents mesitylene)

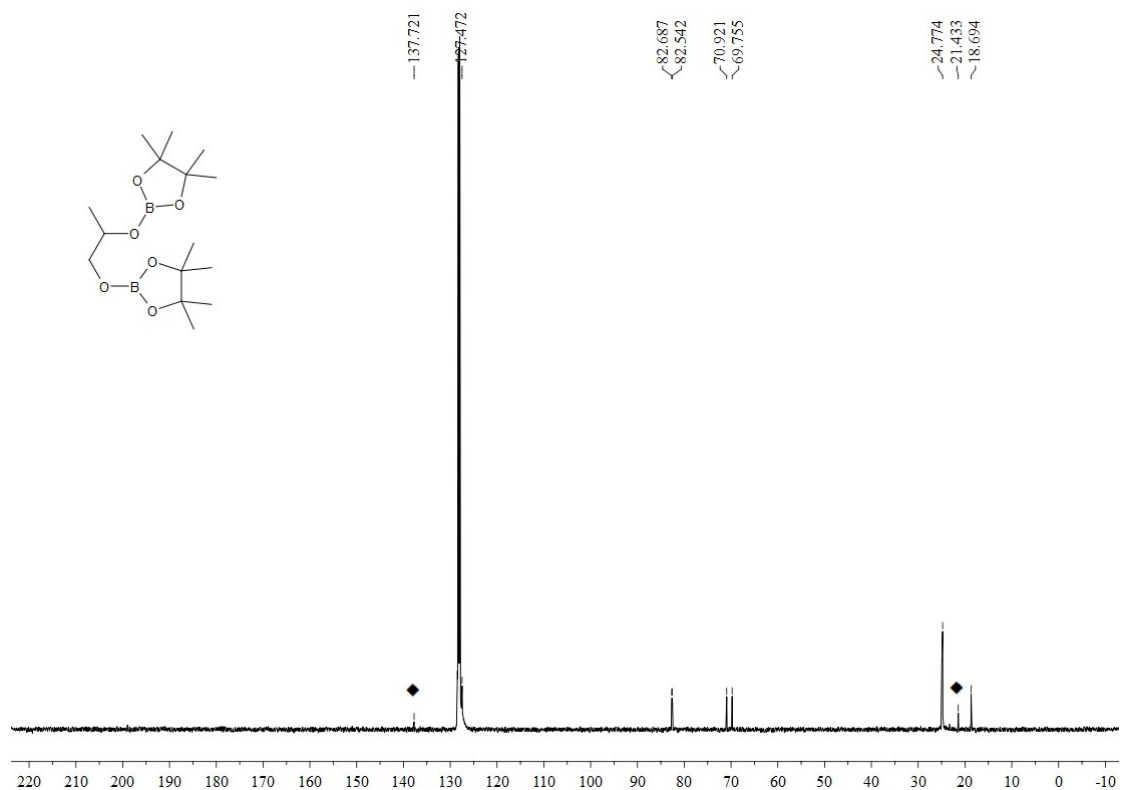

**Figure S65.** <sup>13</sup>C NMR spectrum (125 MHz, C<sub>6</sub>D<sub>6</sub>) of pinBOCH<sub>2</sub>CMeOBpin (◆ represents mesitylene).

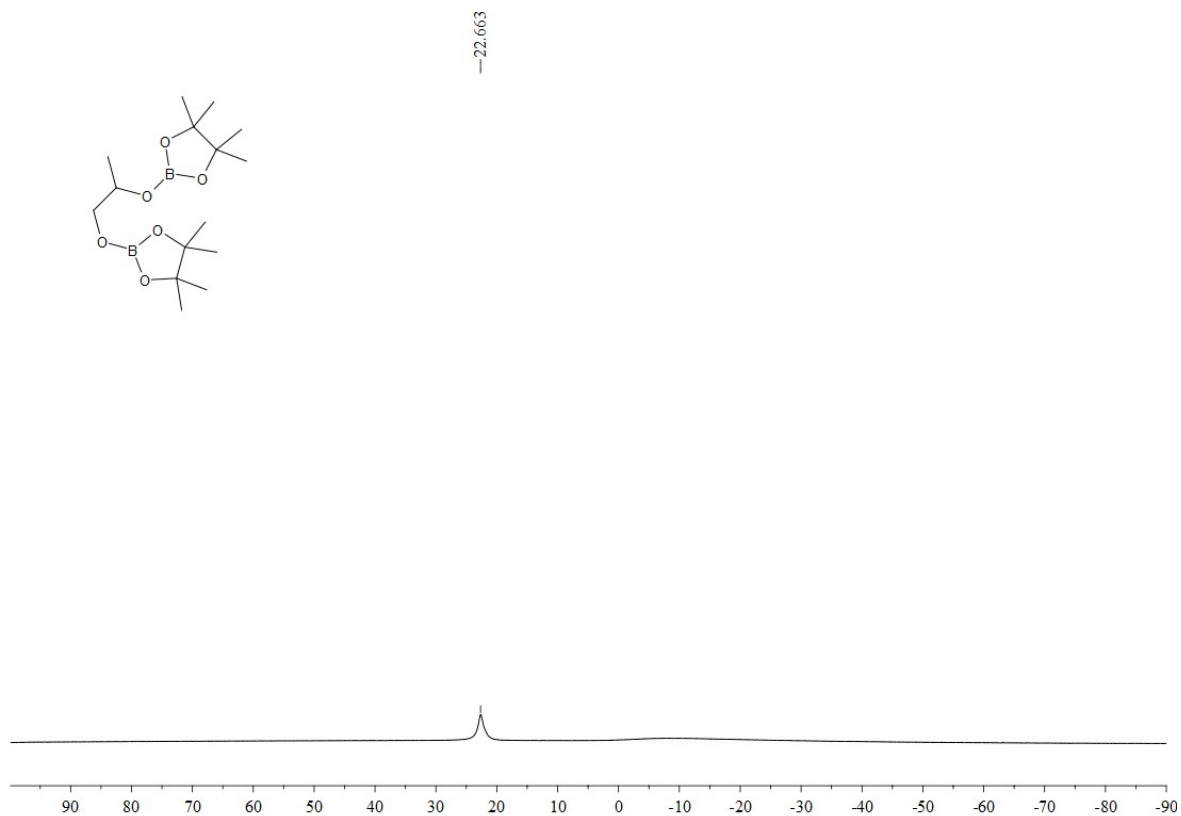

**Figure S66.**  $^{11}\text{B}$  NMR spectrum (128 MHz,  $\text{C}_6\text{D}_6$ ) of pinBOCH<sub>2</sub>CMeOBpin (★ represents HBpin).

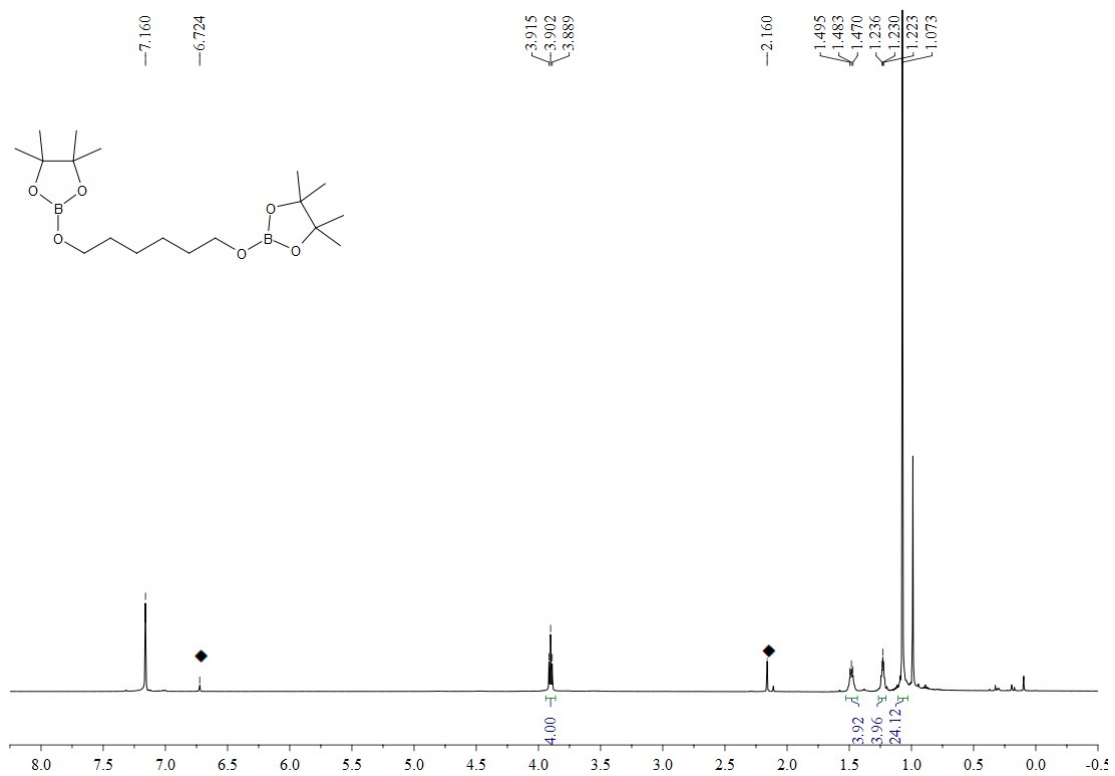

**Figure S67.**  $^1\text{H}$  NMR spectrum (500 MHz,  $\text{C}_6\text{D}_6$ ) of pinBOC<sub>6</sub>H<sub>12</sub>OBpin (◆ represents mesitylene)

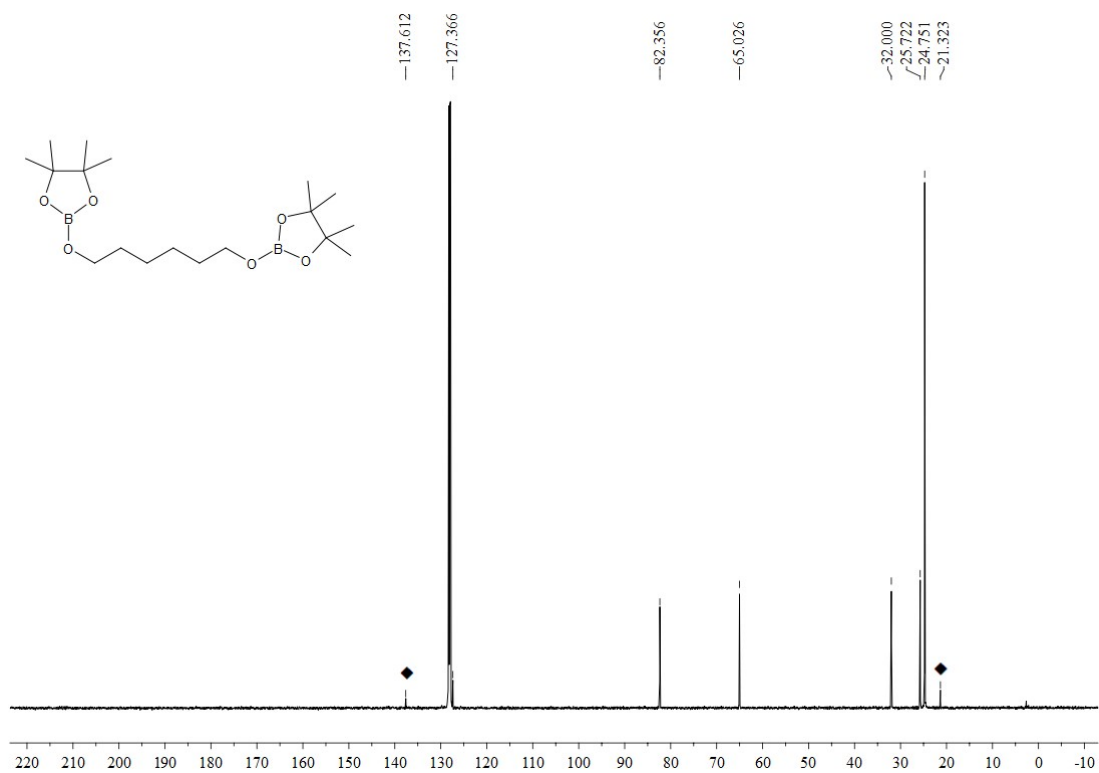

**Figure S68.**  $^{13}\text{C}$  NMR spectrum (125 MHz,  $\text{C}_6\text{D}_6$ ) of pinBOC $_6\text{H}_{12}$ OBpin (◆ represents mesitylene).

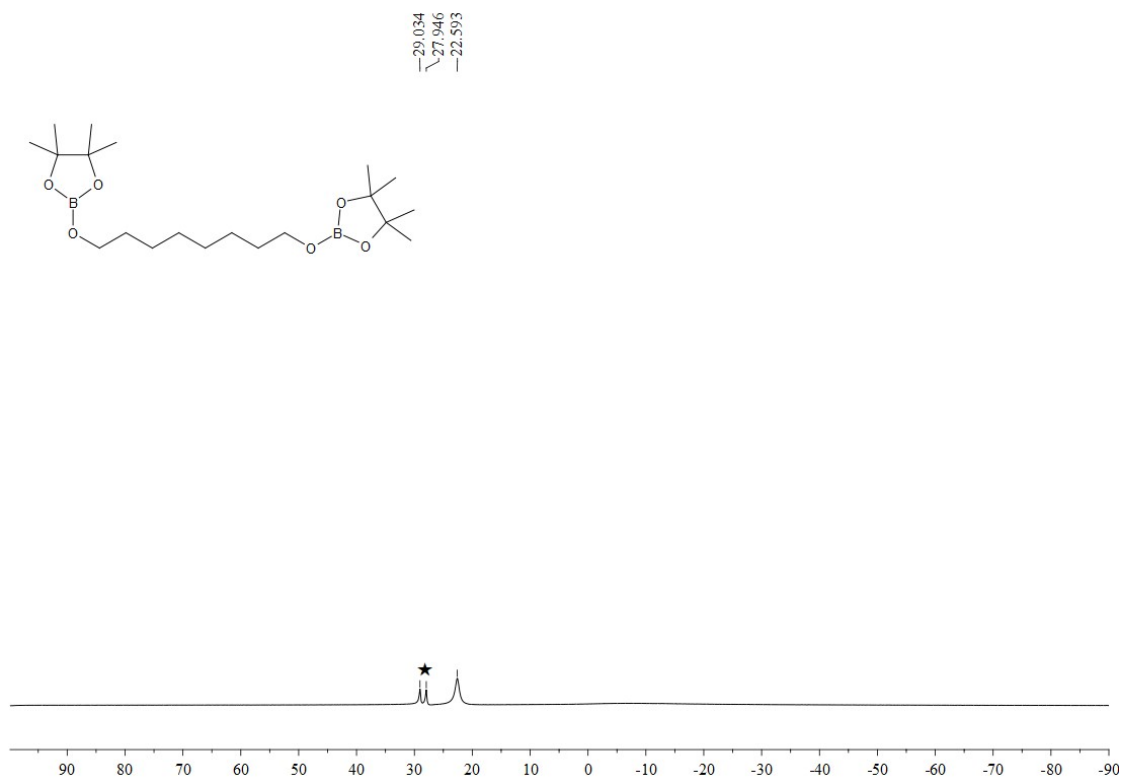

**Figure S69.**  $^{11}\text{B}$  NMR spectrum (128 MHz,  $\text{C}_6\text{D}_6$ ) of pinBOC $_6\text{H}_{12}$ OBpin (★ represents HBpin).

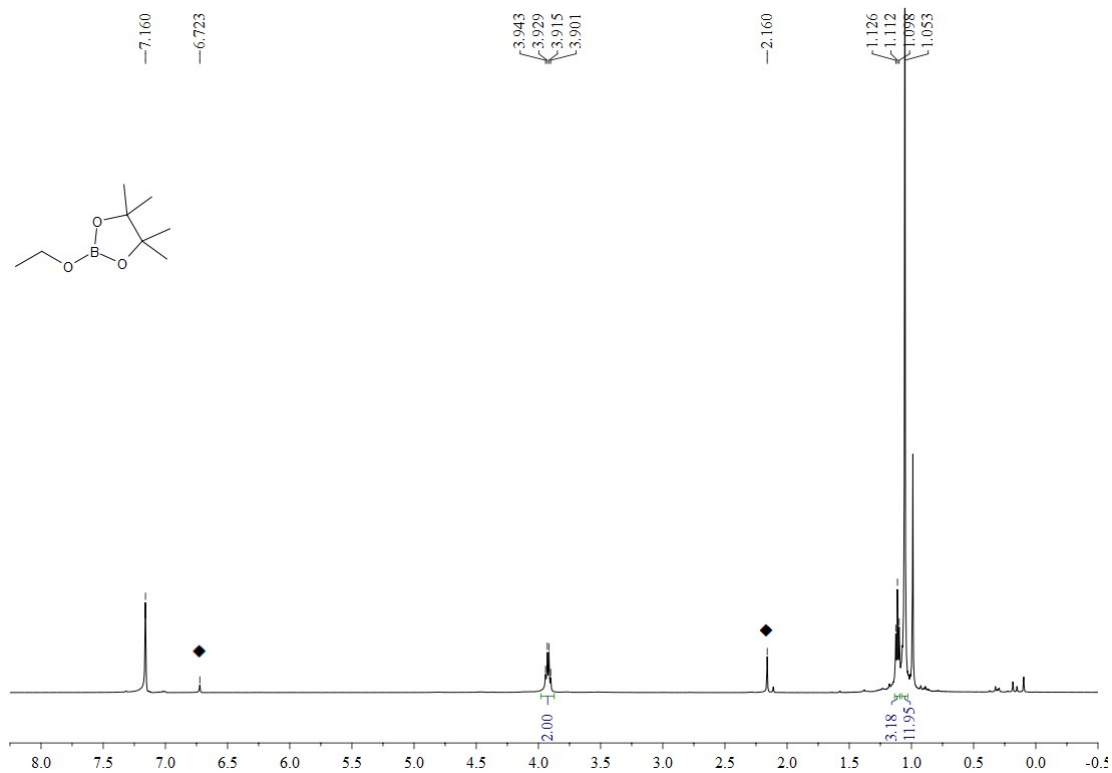

**Figure S70.**  $^1\text{H}$  NMR spectrum (500 MHz,  $\text{C}_6\text{D}_6$ ) of EtOBpin (◆ represents mesitylene)

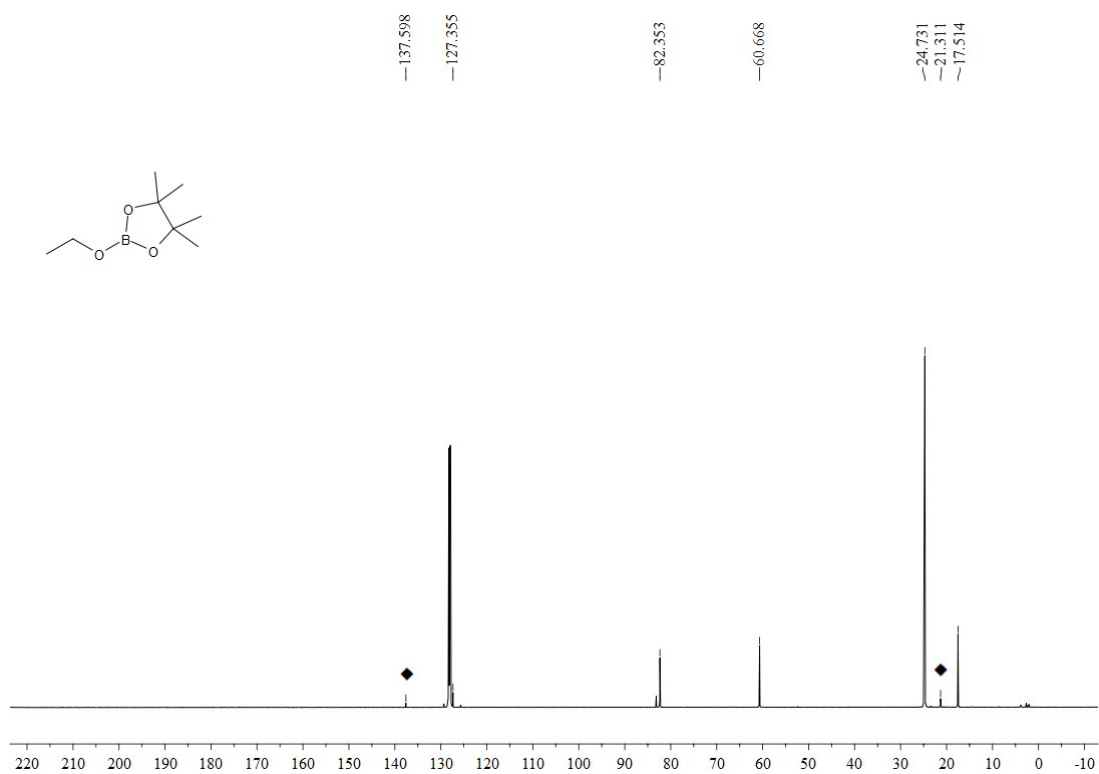

**Figure S71.**  $^{13}\text{C}$  NMR spectrum (125 MHz,  $\text{C}_6\text{D}_6$ ) of EtOBpin (◆ represents mesitylene)

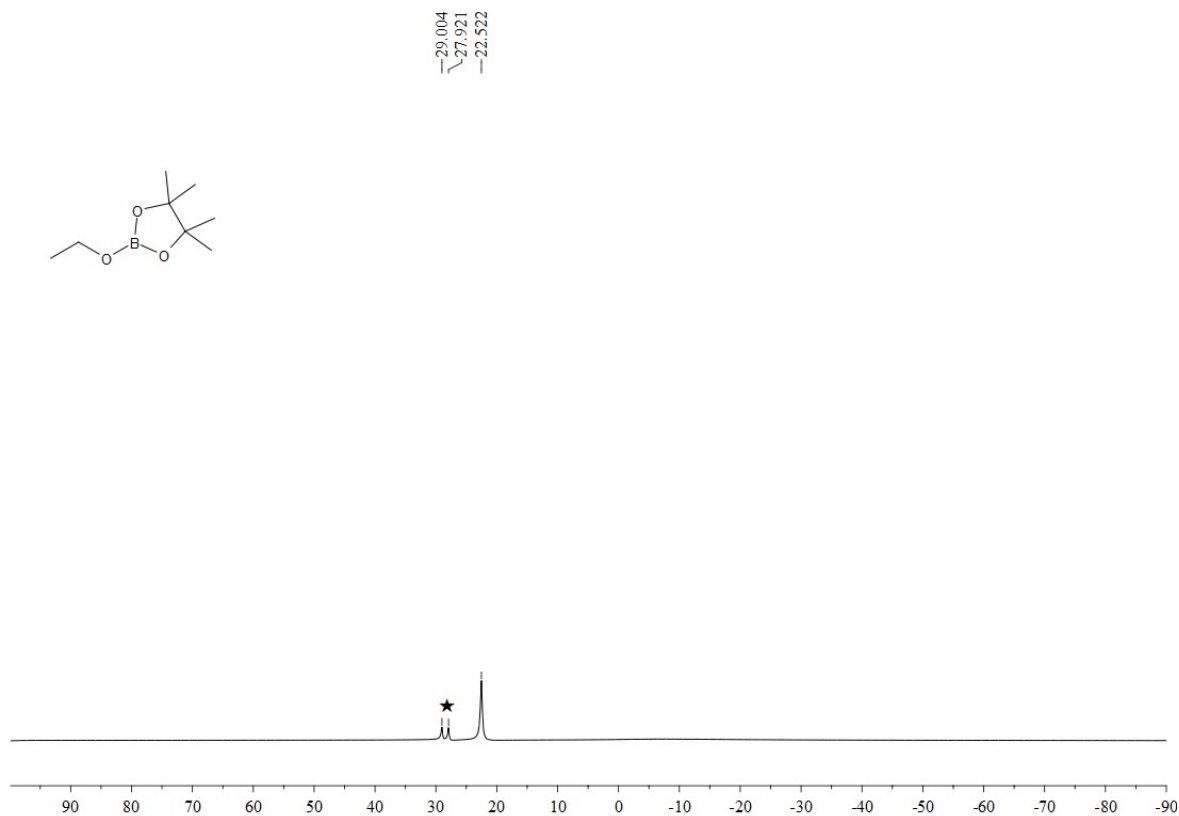

**Figure S72.**  $^{11}\text{B}$  NMR spectrum (128 MHz,  $\text{C}_6\text{D}_6$ ) of EtOBpin (★ represents HBpin).

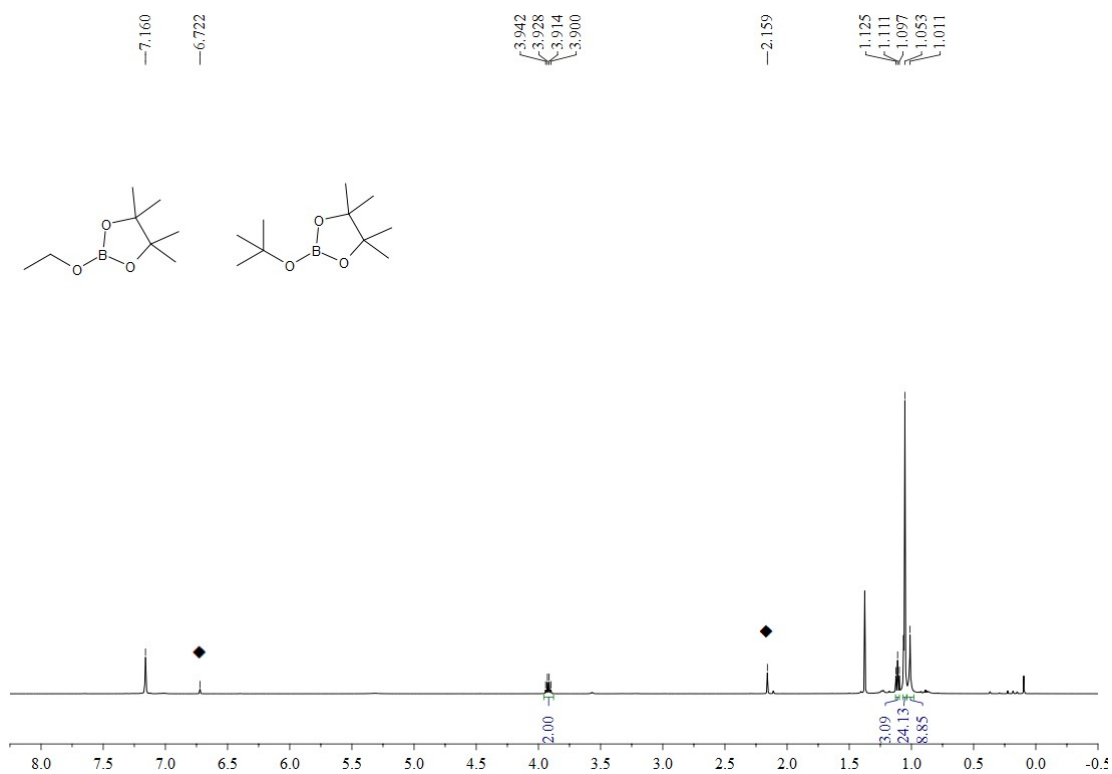

**Figure S73.**  $^1\text{H}$  NMR spectrum (500 MHz,  $\text{C}_6\text{D}_6$ ) of EtOBpin/tBuOBpin (◆ represents mesitylene)

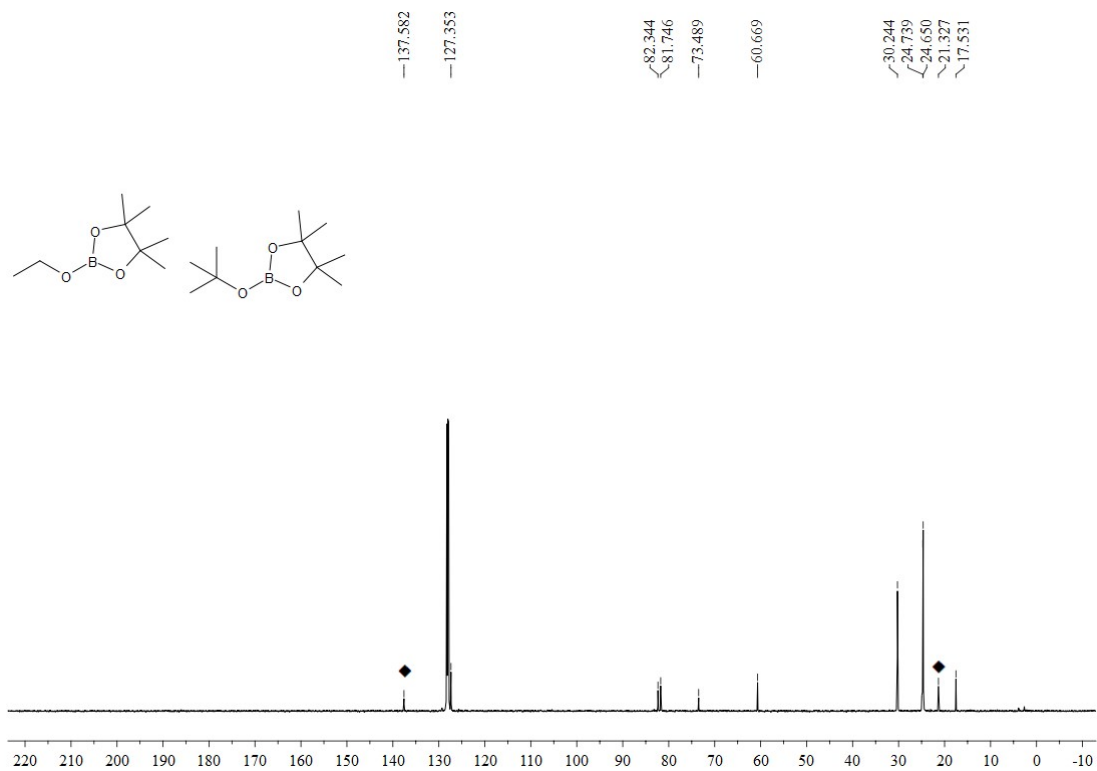

**Figure S74.**  $^{13}\text{C}$  NMR spectrum (125 MHz,  $\text{C}_6\text{D}_6$ ) of EtOBpin/ $^t\text{BuOBpin}$  (◆ represents mesitylene).

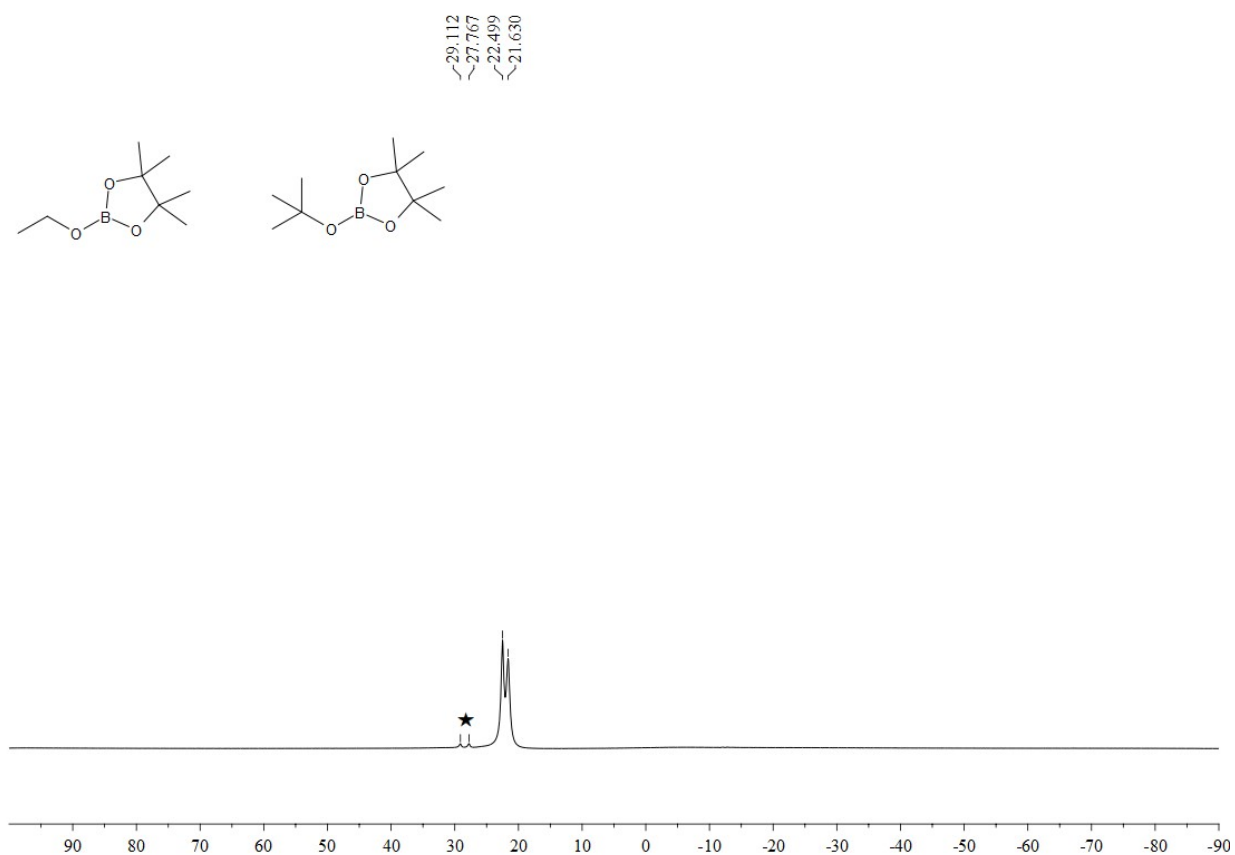

**Figure S75.**  $^{11}\text{B}$  NMR spectrum (128 MHz,  $\text{C}_6\text{D}_6$ ) of EtOBpin/ $^t\text{BuOBpin}$  (★ represents HBpin).

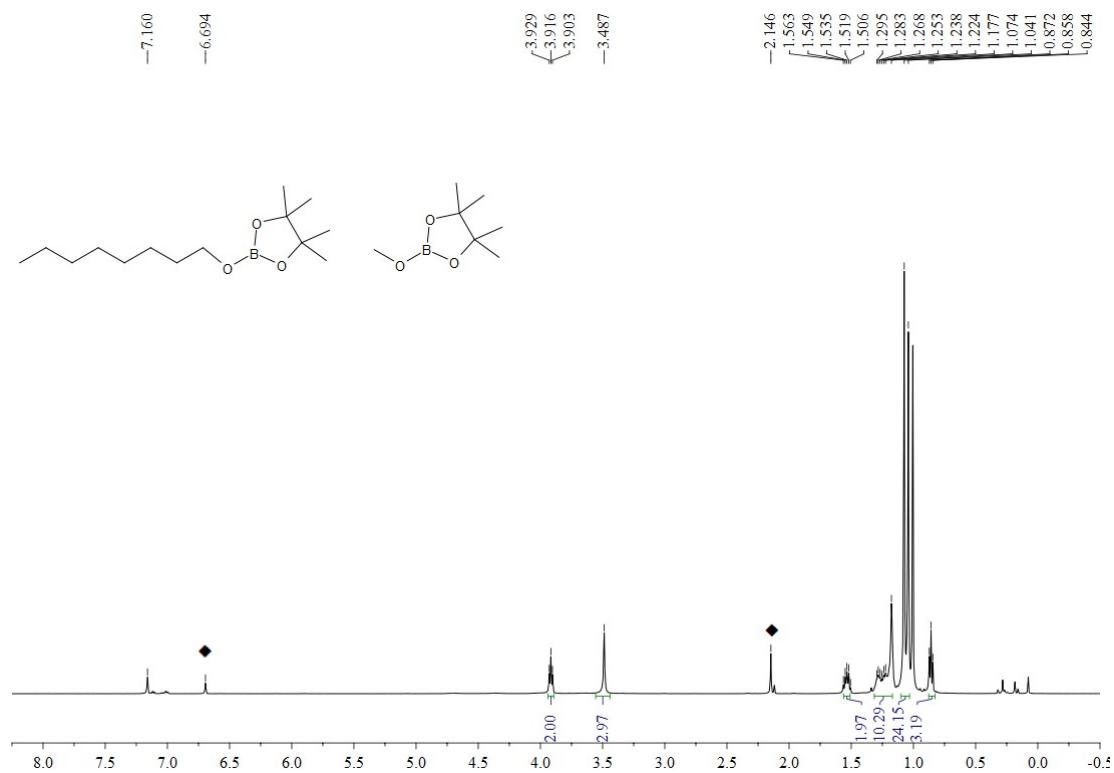

**Figure S76.**  $^1\text{H}$  NMR spectrum (500 MHz,  $\text{C}_6\text{D}_6$ ) of  $\text{C}_8\text{H}_{17}\text{OBpin/MeOBpin}$  (◆ represents mesitylene)

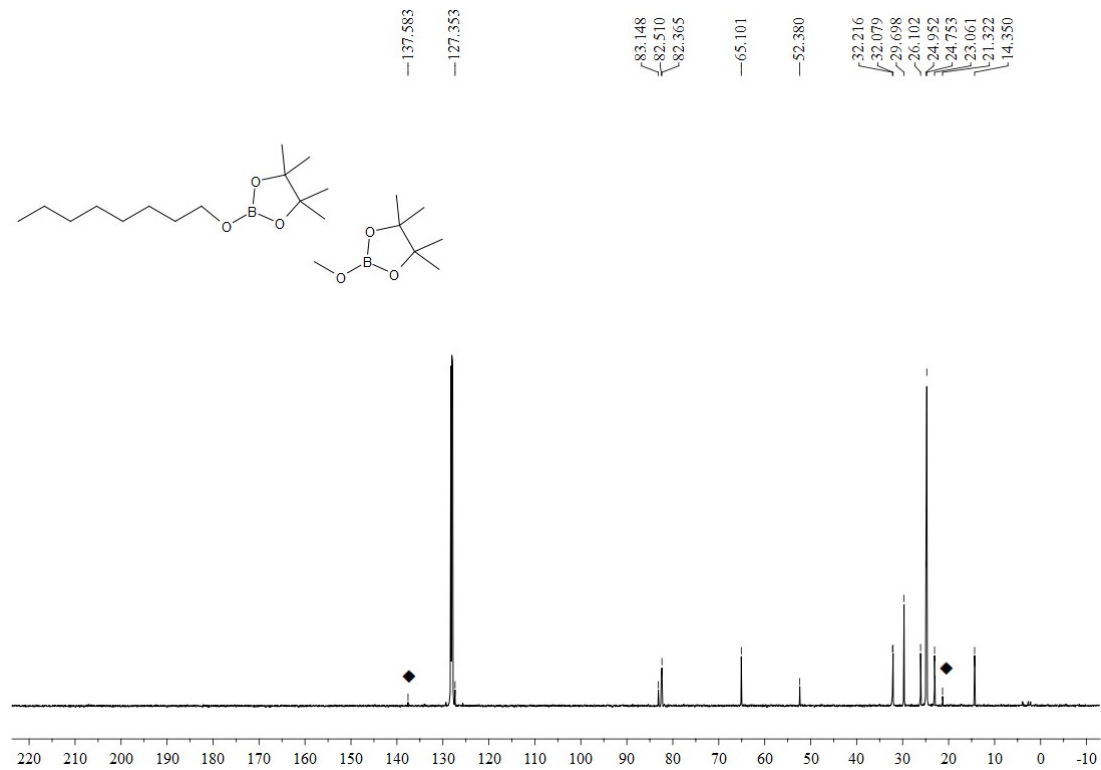

**Figure S77.**  $^{13}\text{C}$  NMR spectrum (125 MHz,  $\text{C}_6\text{D}_6$ ) of  $\text{C}_8\text{H}_{17}\text{OBpin/MeOBpin}$  (◆ represents mesitylene).



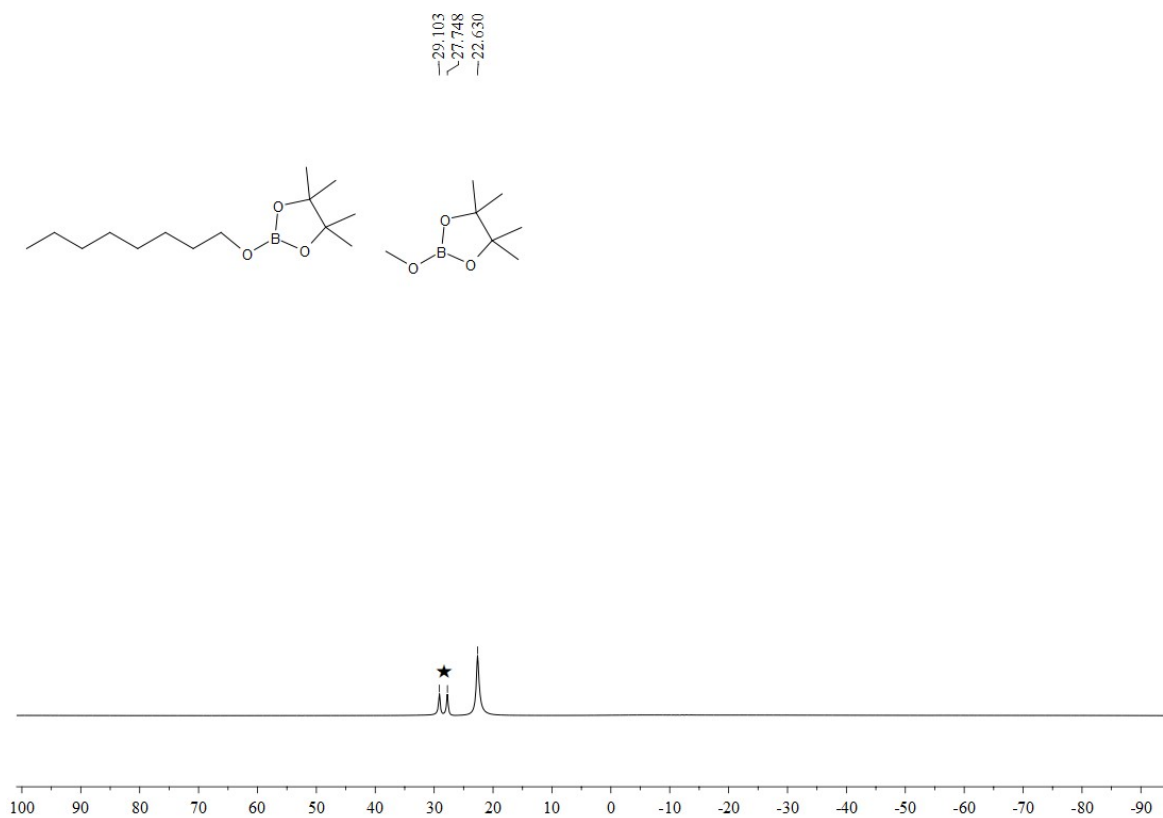

**Figure S78.**  $^{11}\text{B}$  NMR spectrum (128 MHz,  $\text{C}_6\text{D}_6$ ) of  $\text{C}_8\text{H}_{17}\text{OBpin}/\text{MeOBpin}$  (★ represents HBpin).

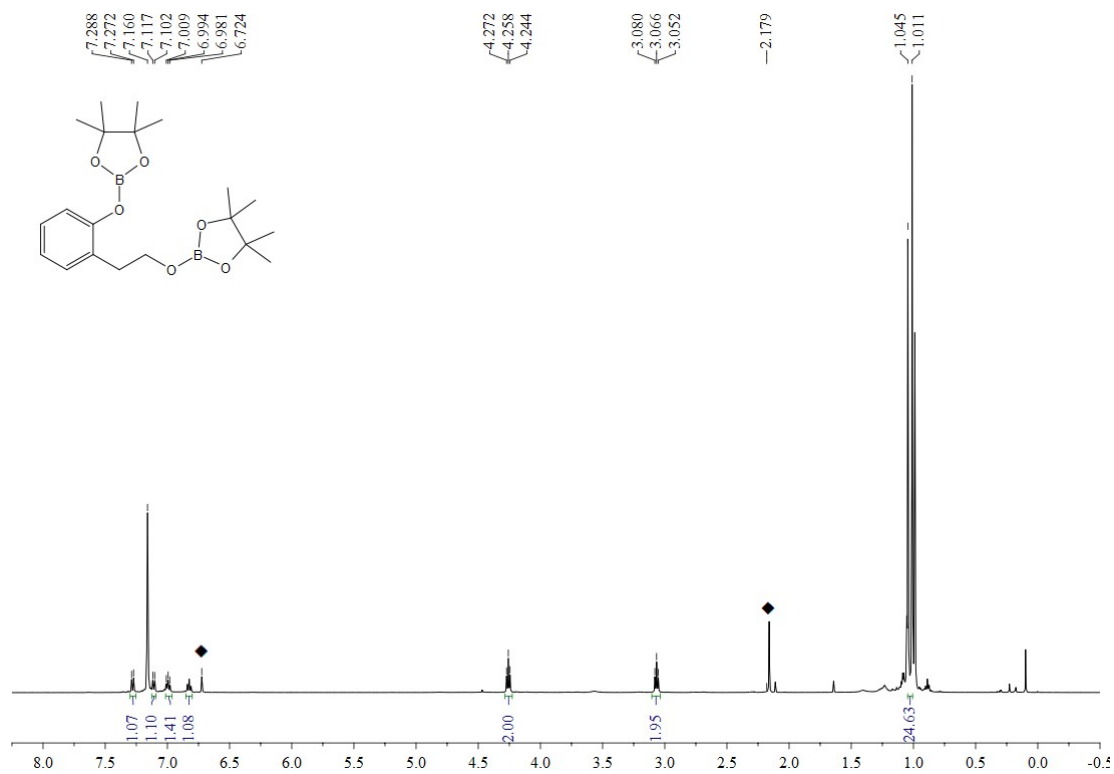

**Figure S79.**  $^1\text{H}$  NMR spectrum (500 MHz,  $\text{C}_6\text{D}_6$ ) of  $\text{pinBOPhCH}_2\text{CH}_2\text{OBpin}$  (◆ represents mesitylene)

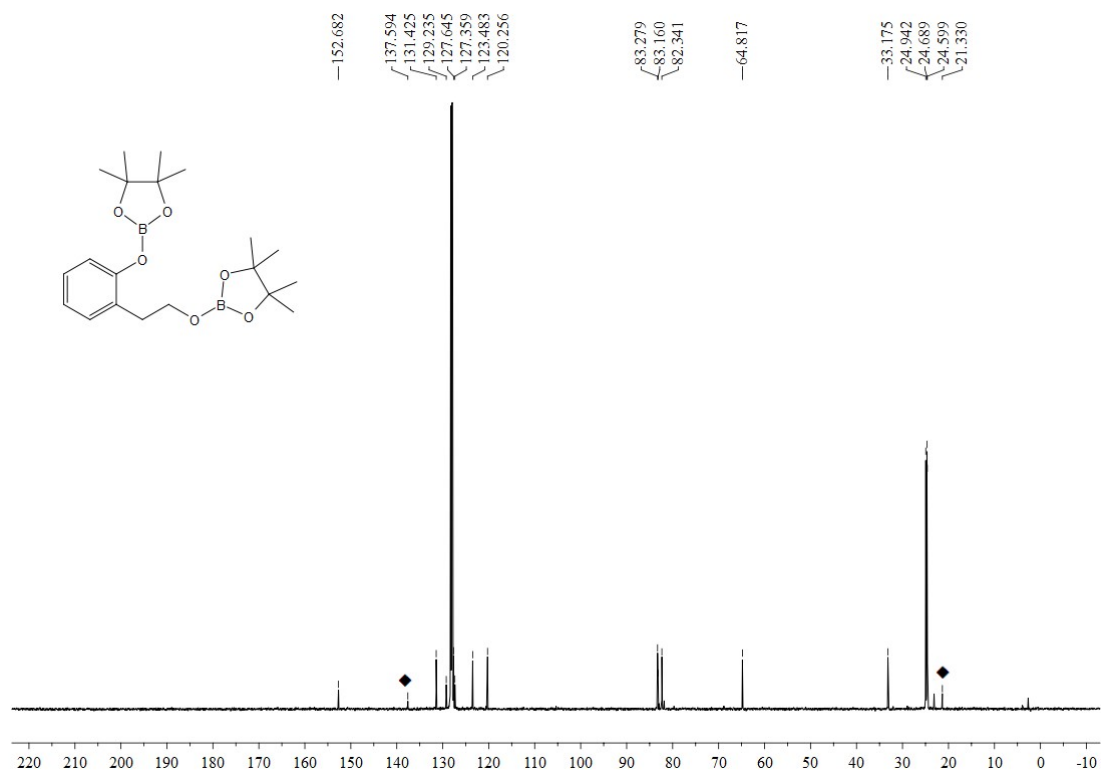

**Figure S80.** <sup>13</sup>C NMR spectrum (125 MHz, C<sub>6</sub>D<sub>6</sub>) of pinBOPhCH<sub>2</sub>CH<sub>2</sub>OBpin (◆ represents mesitylene).

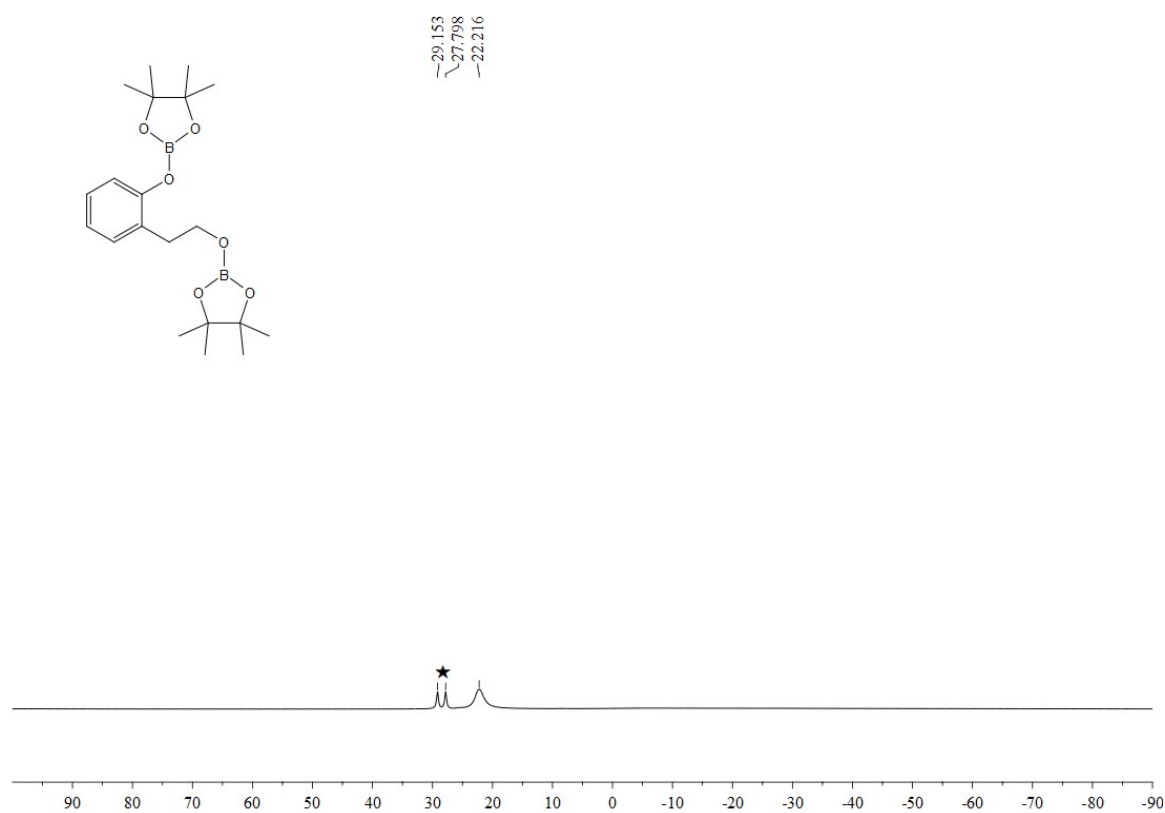

**Figure S81.** <sup>11</sup>B NMR spectrum (128 MHz, C<sub>6</sub>D<sub>6</sub>) of pinBOPhCH<sub>2</sub>CH<sub>2</sub>OBpin (★ represents HBpin).

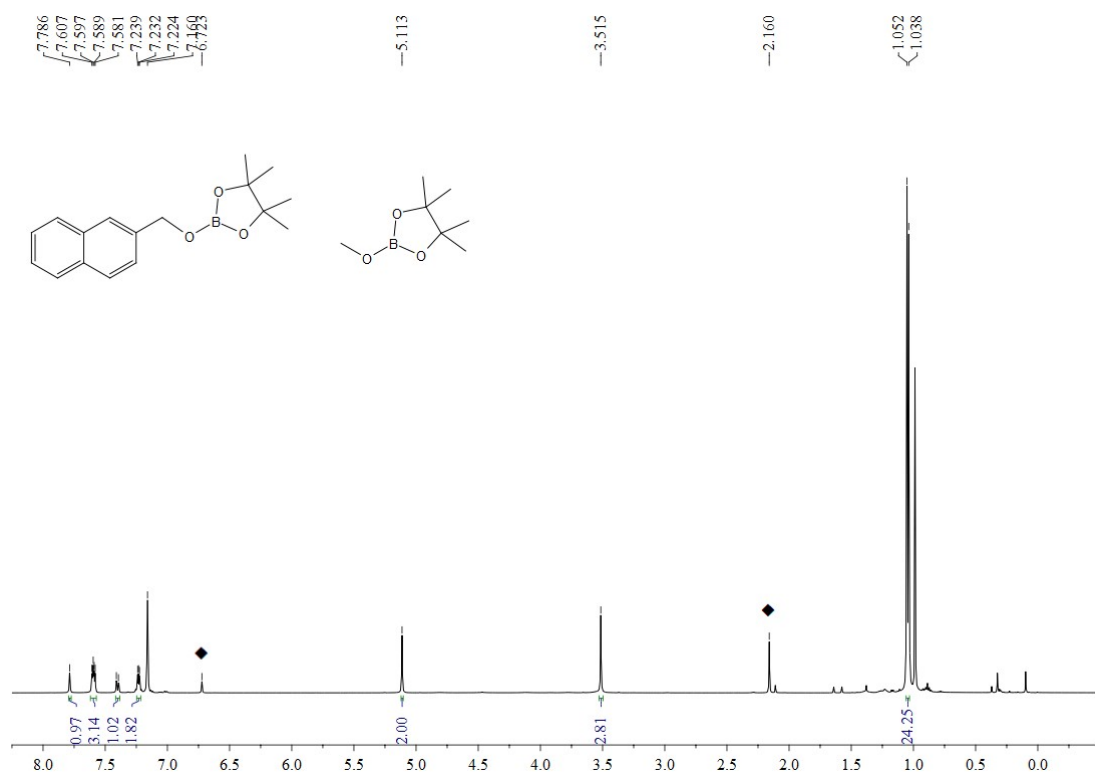

**Figure S82.** <sup>1</sup>H NMR spectrum (500 MHz, C<sub>6</sub>D<sub>6</sub>) of naphthyl-CH<sub>2</sub>OBpin/MeOBpin (◆ represents mesitylene)

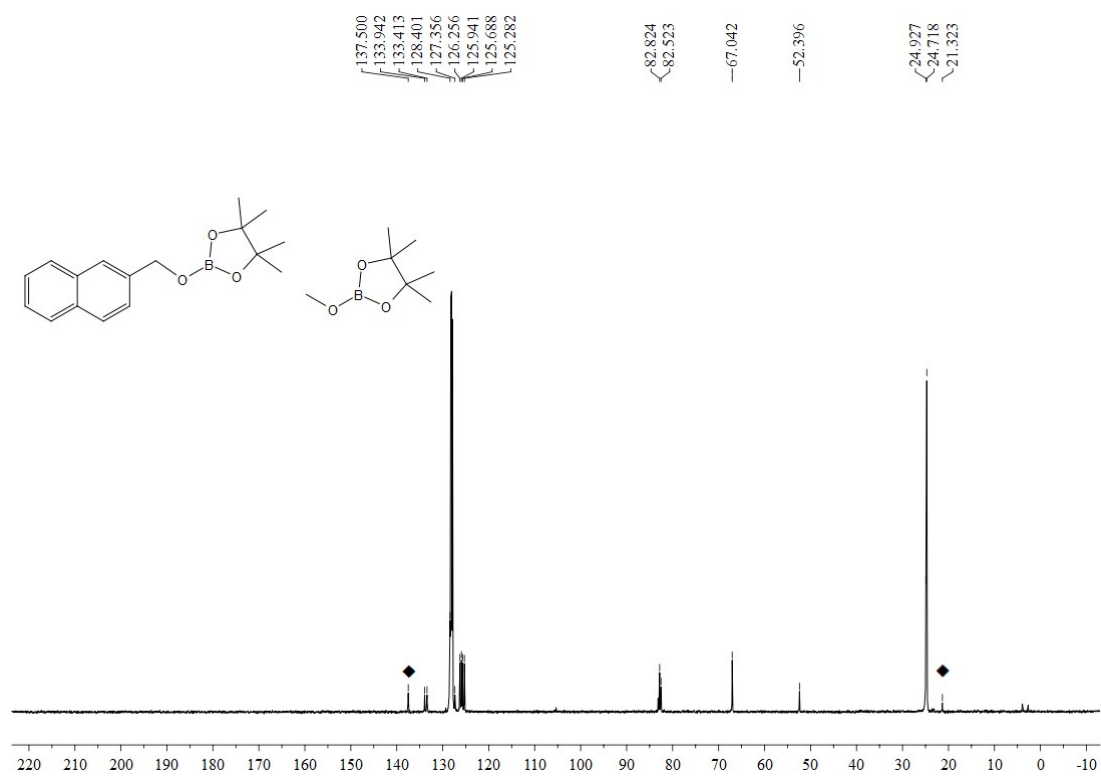

**Figure S83.** <sup>13</sup>C NMR spectrum (125 MHz, C<sub>6</sub>D<sub>6</sub>) of naphthyl-CH<sub>2</sub>OBpin/MeOBpin (◆ represents mesitylene).

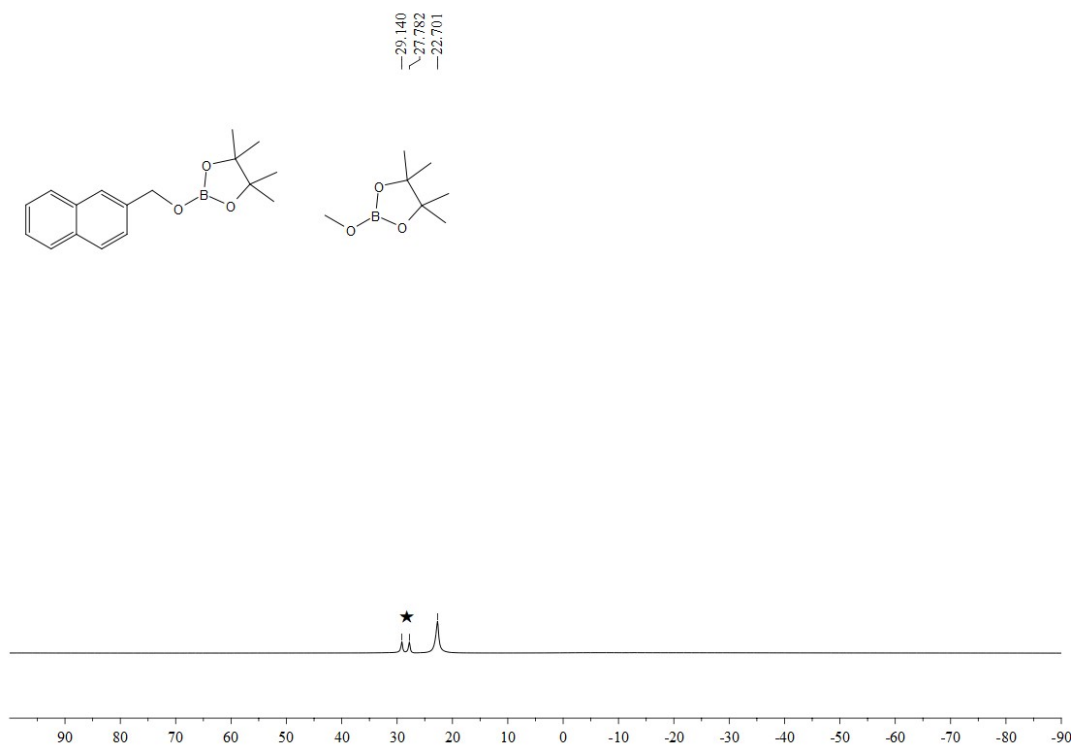

**Figure S84.** <sup>11</sup>B NMR spectrum (128 MHz, C<sub>6</sub>D<sub>6</sub>) of naphthyl-CH<sub>2</sub>OBpin/MeOBpin (★ represents HBpin).

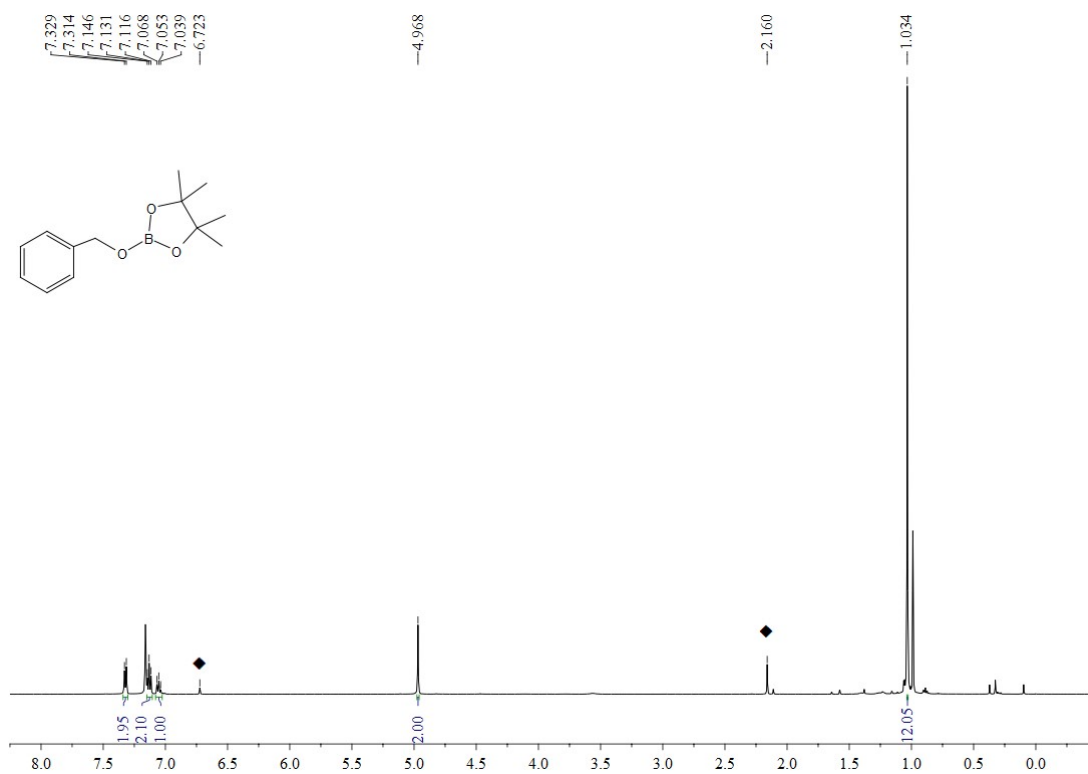

**Figure S85.** <sup>1</sup>H NMR spectrum (500 MHz, C<sub>6</sub>D<sub>6</sub>) of PhCH<sub>2</sub>OBpin (◆ represents mesitylene)

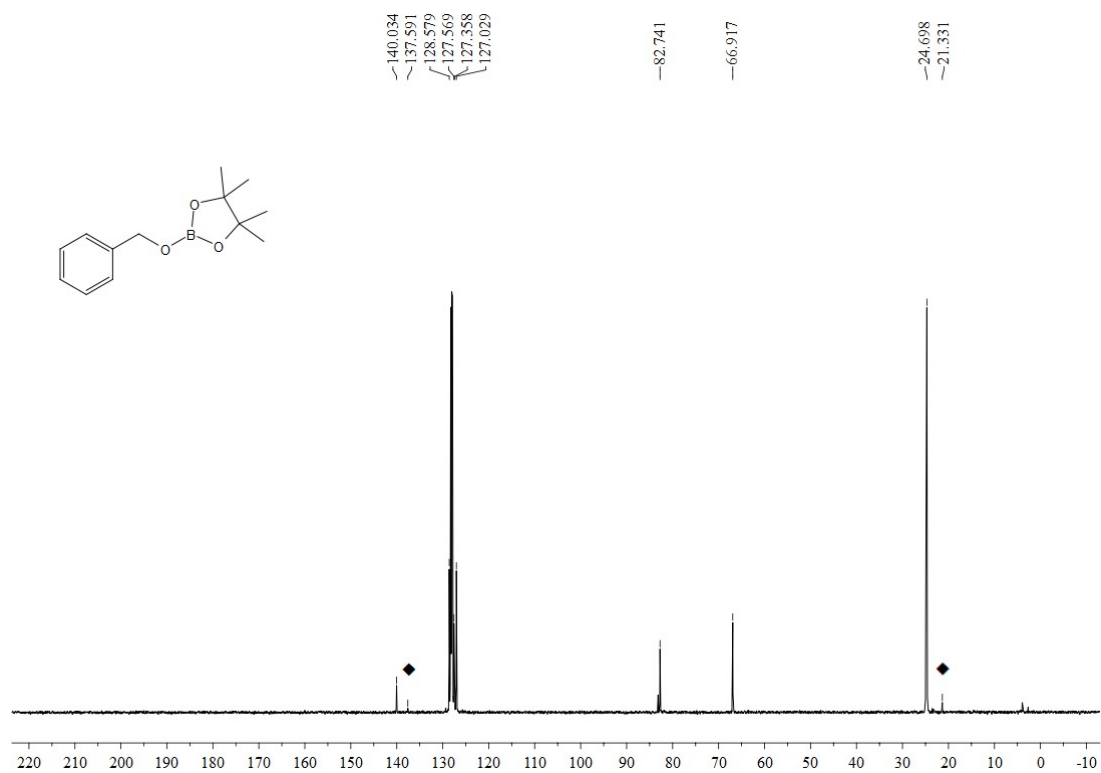

**Figure S86.** <sup>13</sup>C NMR spectrum (125 MHz, C<sub>6</sub>D<sub>6</sub>) of PhCH<sub>2</sub>OBpin (◆ represents mesitylene).

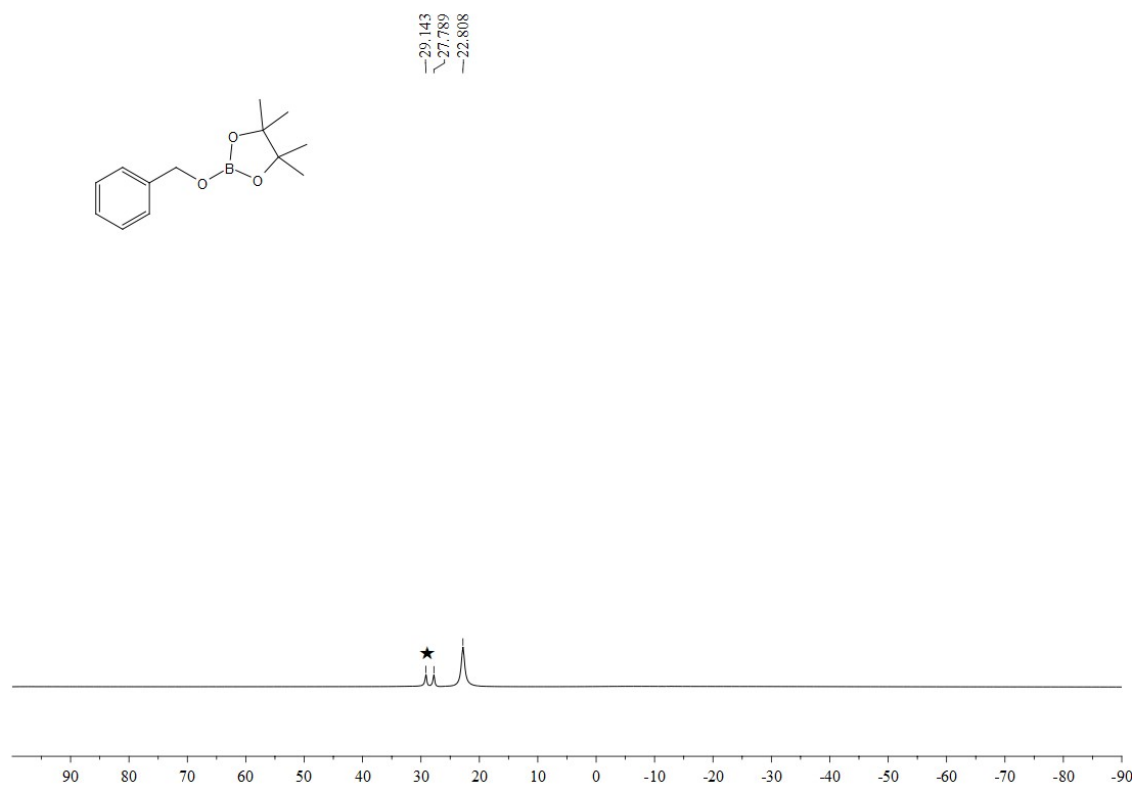

**Figure S87.** <sup>11</sup>B NMR spectrum (128 MHz, C<sub>6</sub>D<sub>6</sub>) of PhCH<sub>2</sub>OBpin (★ represents HBpin).

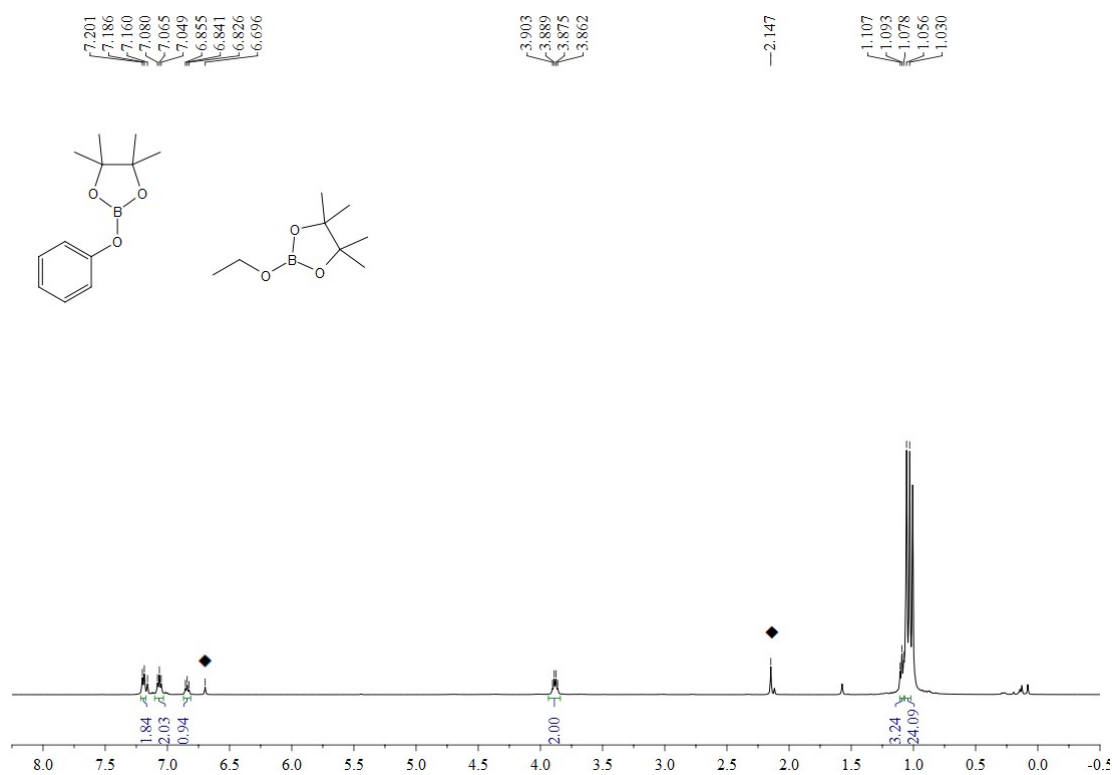

**Figure S88.**  $^1\text{H}$  NMR spectrum (500 MHz,  $\text{C}_6\text{D}_6$ ) of PhOBpin/EtOBpin (◆ represents mesitylene)

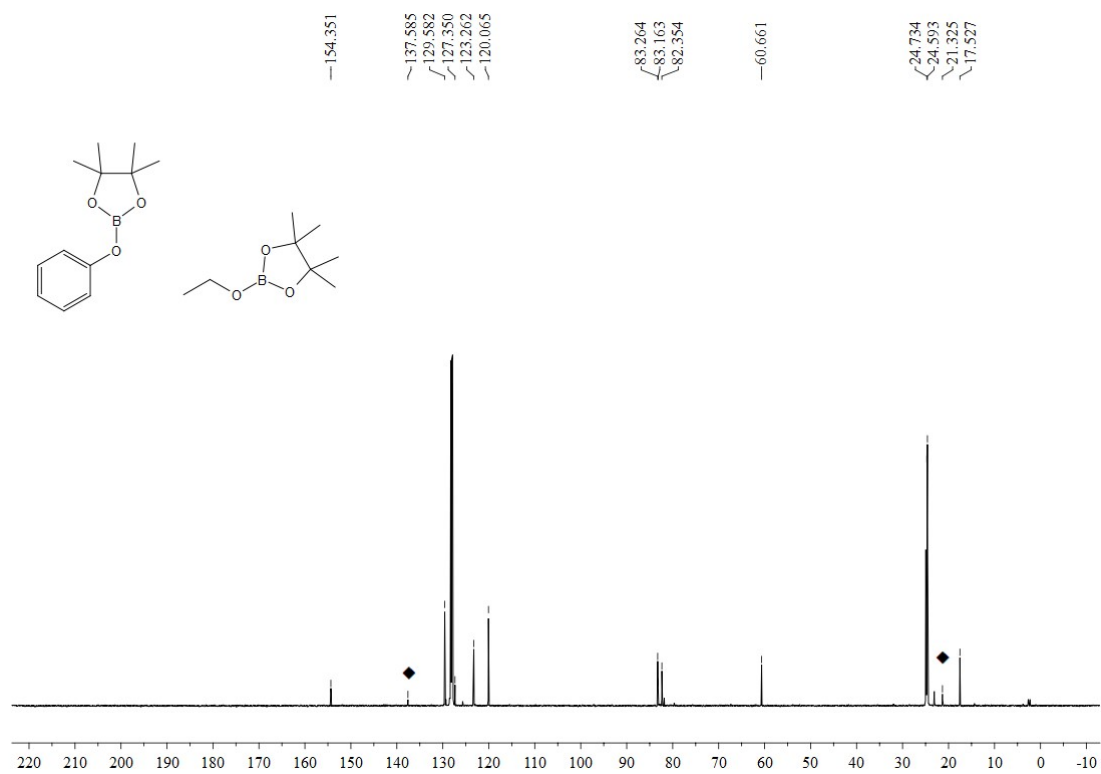

**Figure S89.**  $^{13}\text{C}$  NMR spectrum (125 MHz,  $\text{C}_6\text{D}_6$ ) of PhOBpin/EtOBpin (◆ represents mesitylene).

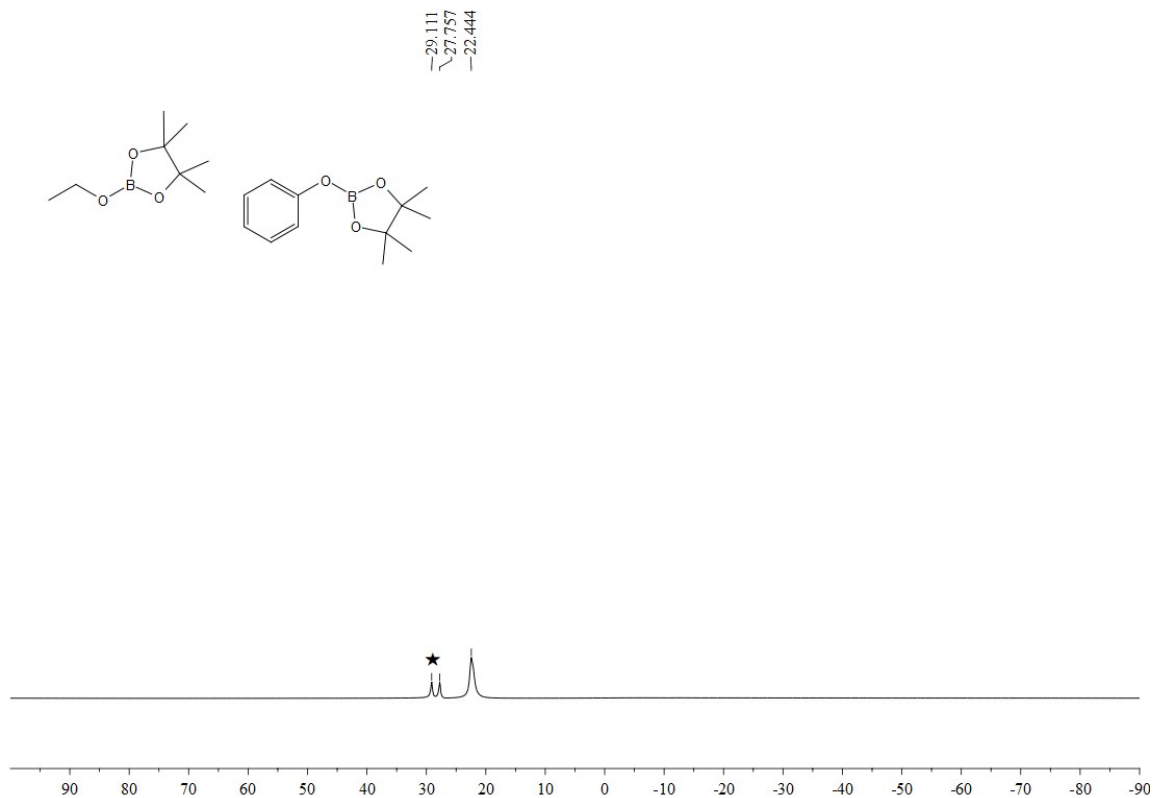

Figure S90.  $^{11}\text{B}$  NMR spectrum (128 MHz,  $\text{C}_6\text{D}_6$ ) of EtOBpin / PhOBpin (★ represents HBpin).

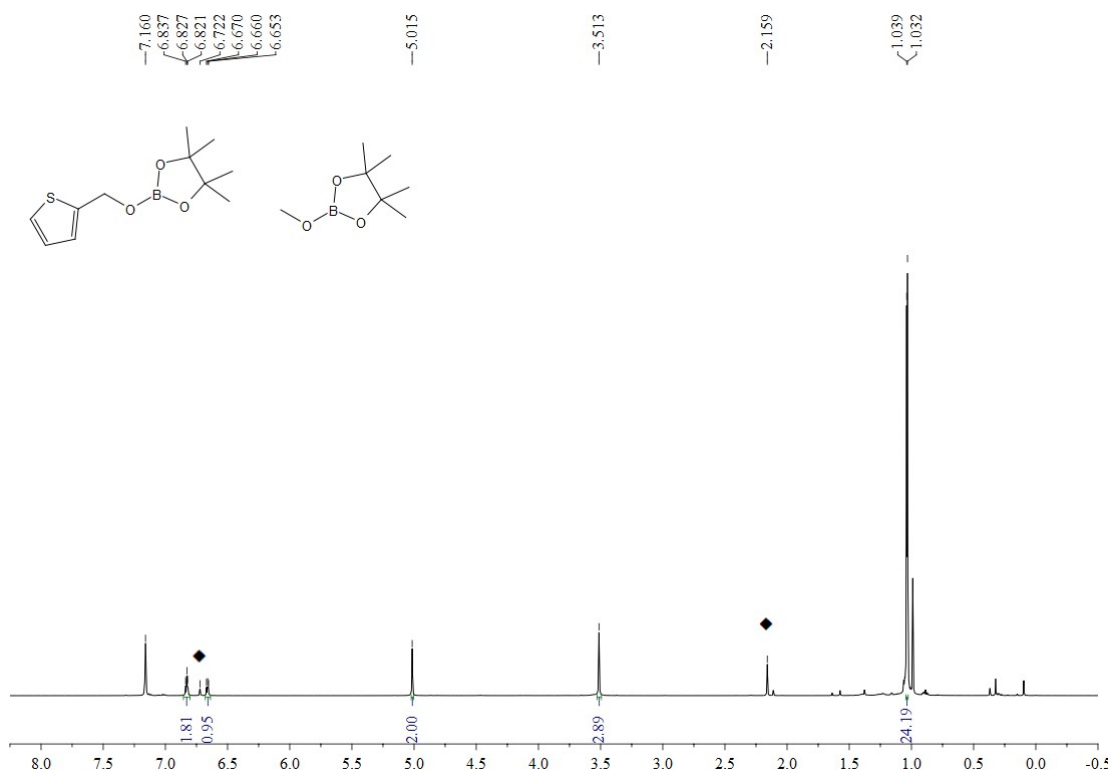

Figure S91.  $^1\text{H}$  NMR spectrum (500 MHz,  $\text{C}_6\text{D}_6$ ) of 2-thienyl-CH<sub>2</sub>OBpin / MeOBpin (◆ represents mesitylene).

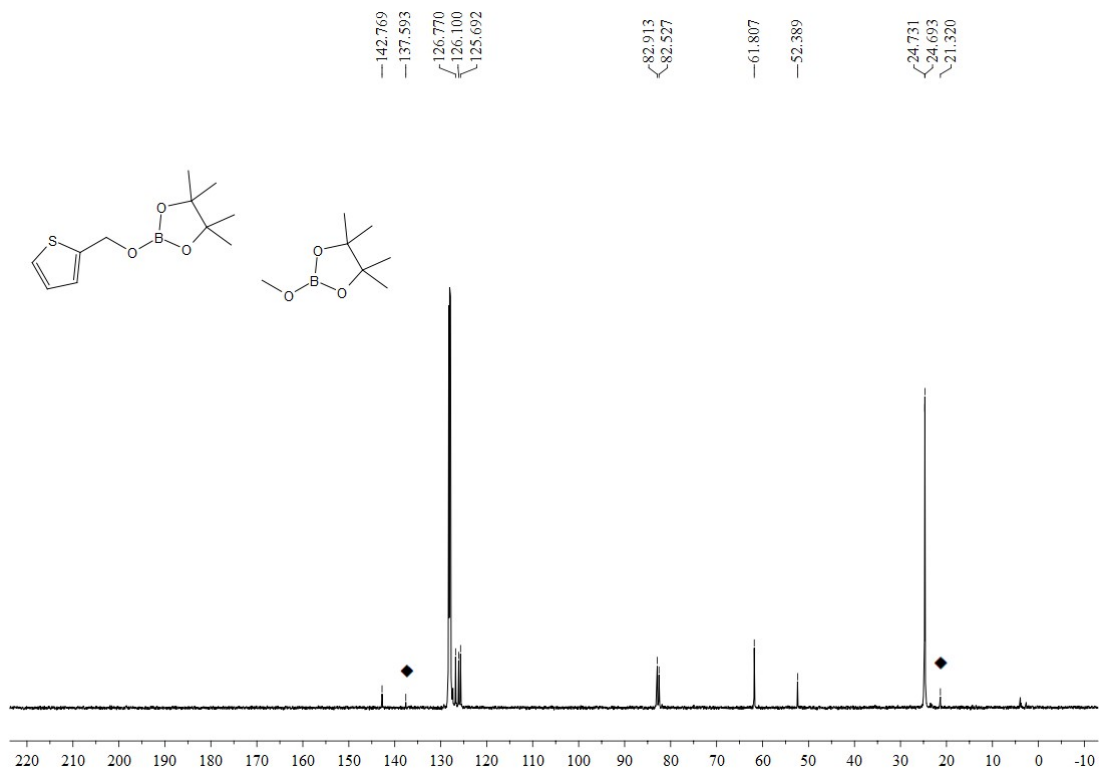

**Figure S92.**  $^{13}\text{C}$  NMR spectrum (125 MHz,  $\text{C}_6\text{D}_6$ ) of 2-thienyl- $\text{CH}_2\text{OBpin/MeOBpin}$  (◆ represents mesitylene)

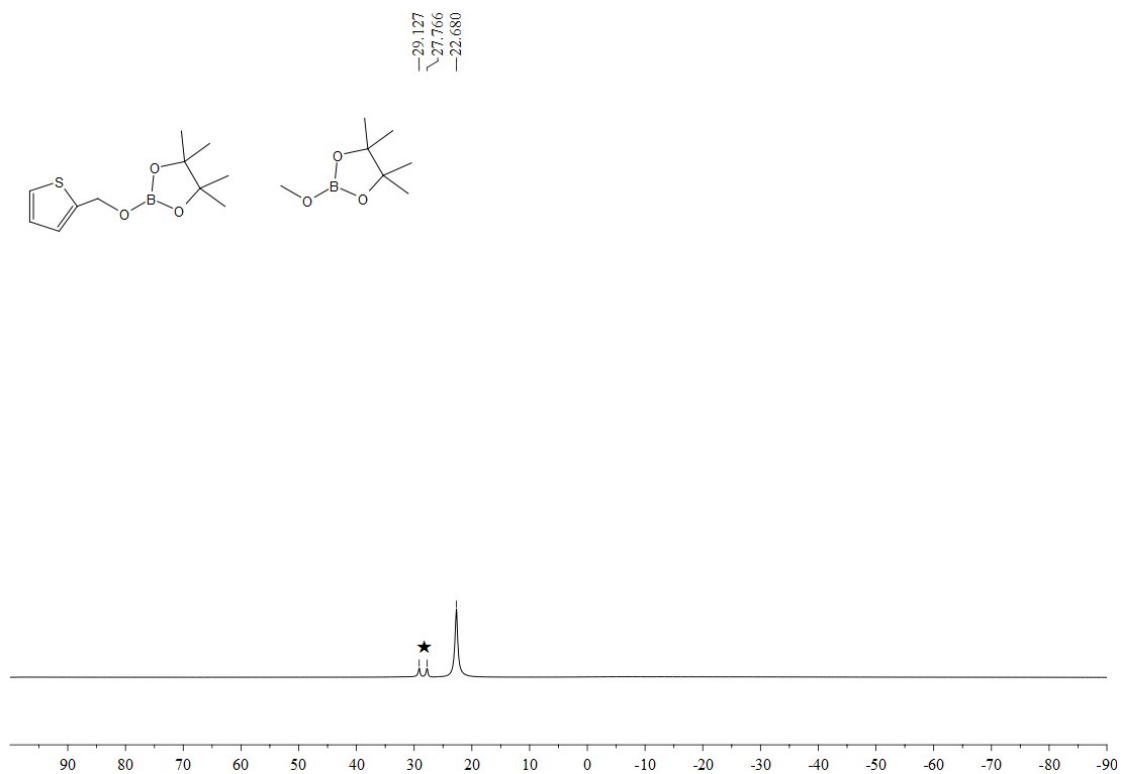

**Figure S93.**  $^{11}\text{B}$  NMR spectrum (128 MHz,  $\text{C}_6\text{D}_6$ ) of 2-thienyl- $\text{CH}_2\text{OBpin/MeOBpin}$  (★ represents HBpin).



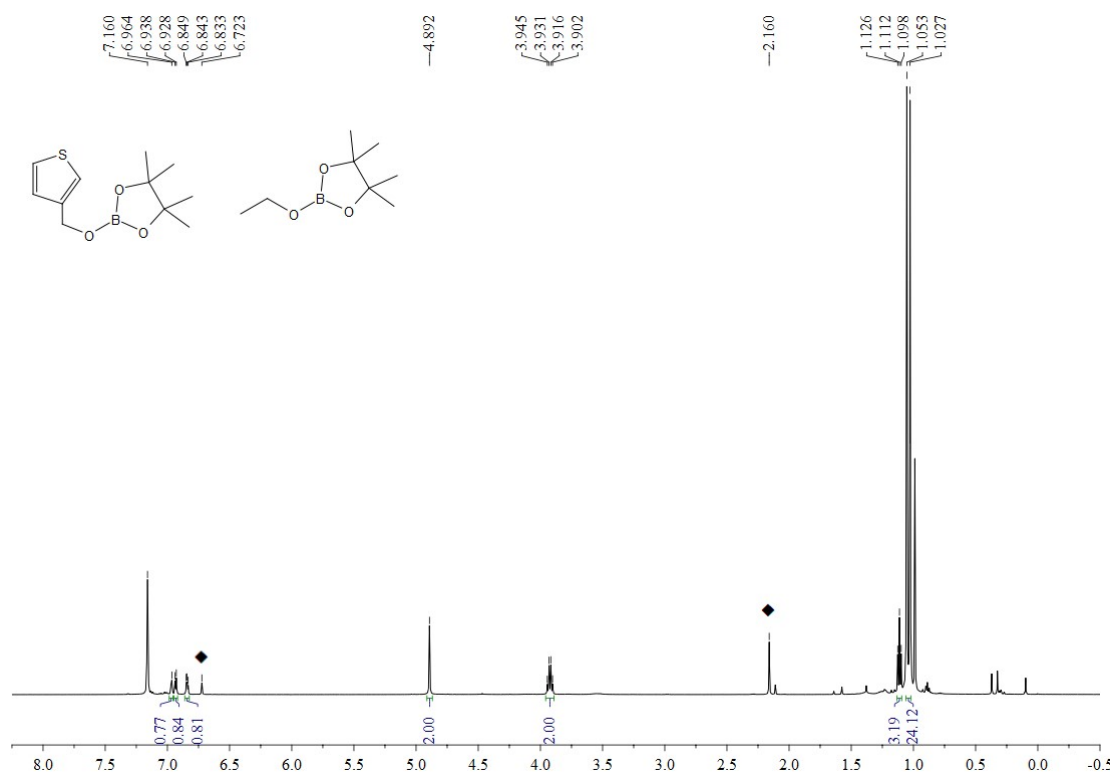

**Figure S94.** <sup>1</sup>H NMR spectrum (500 MHz, C<sub>6</sub>D<sub>6</sub>) of 3-thienyl-CH<sub>2</sub>OBpin/EtOBpin (◆ represents mesitylene).

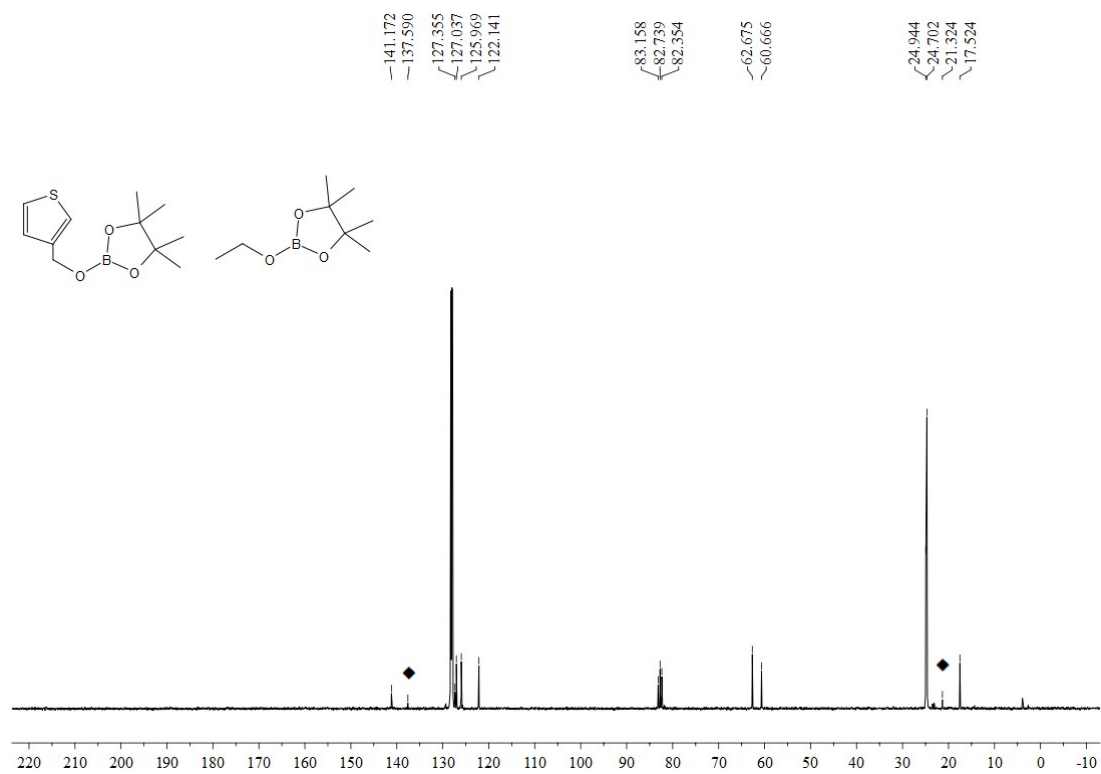

**Figure S95.** <sup>13</sup>C NMR spectrum (125 MHz, C<sub>6</sub>D<sub>6</sub>) of 3-thienyl-CH<sub>2</sub>OBpin/EtOBpin. (◆ represents mesitylene).

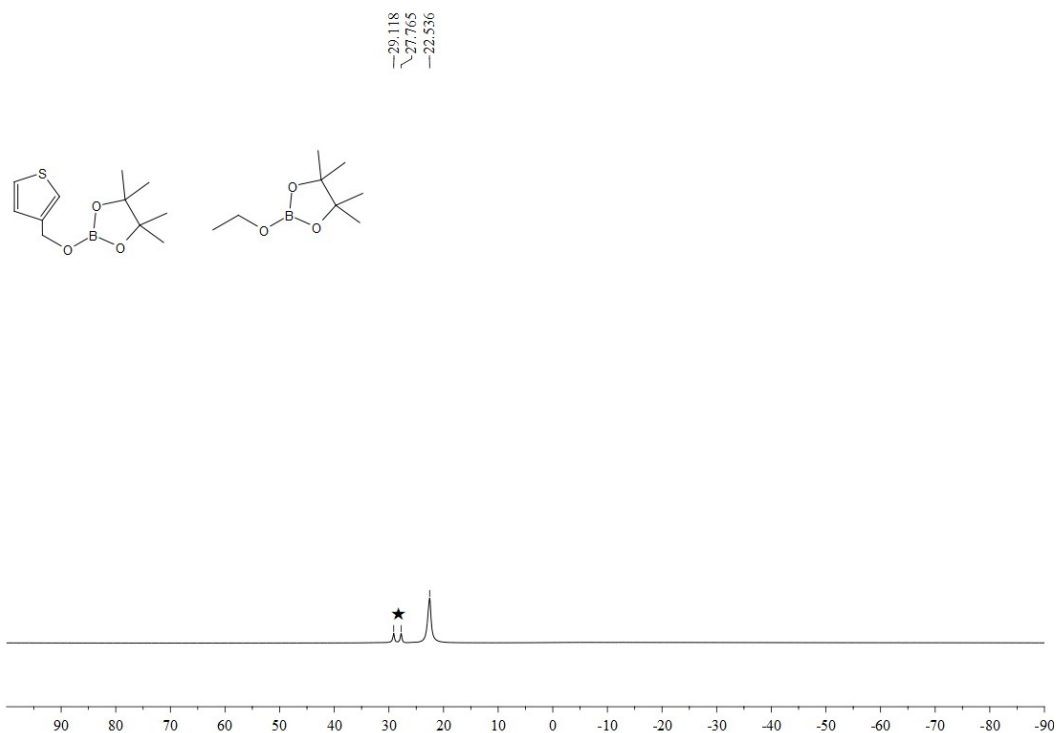

**Figure S96.** <sup>11</sup>B NMR spectrum (128 MHz, C<sub>6</sub>D<sub>6</sub>) of 3-thienyl-CH<sub>2</sub>OBpin/EtOBpin (★ represents HBpin).

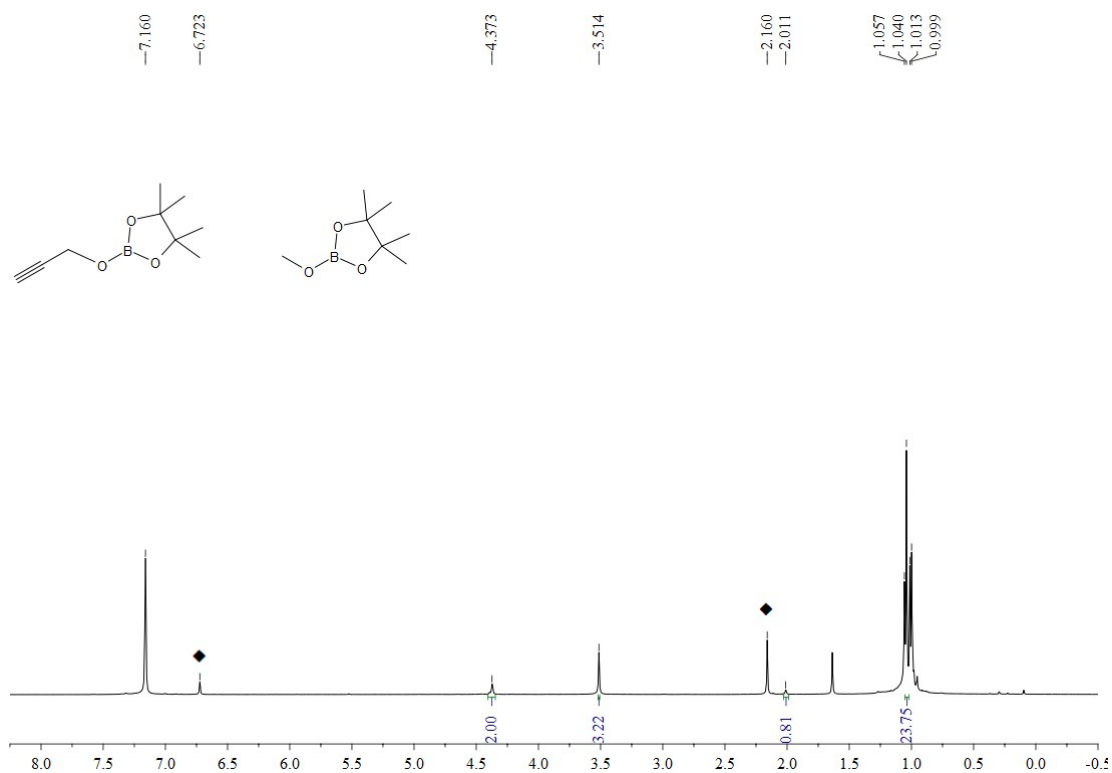

**Figure S97.** <sup>1</sup>H NMR spectrum (500 MHz, C<sub>6</sub>D<sub>6</sub>) of HCCCH<sub>2</sub>OBpin/MeOBpin (◆ represents mesitylene).

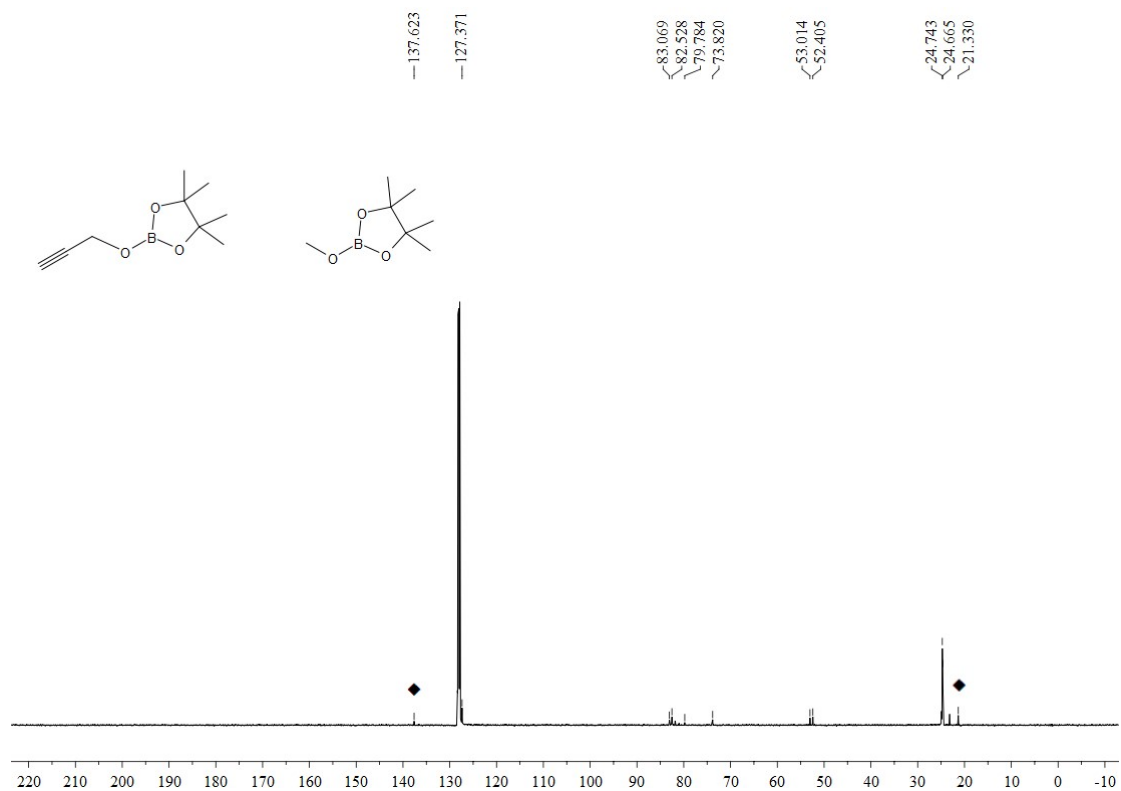

**Figure S98.** <sup>13</sup>C NMR spectrum (125 MHz, C<sub>6</sub>D<sub>6</sub>) of HCCCH<sub>2</sub>OBpin/MeOBpin (◆ represents mesitylene).

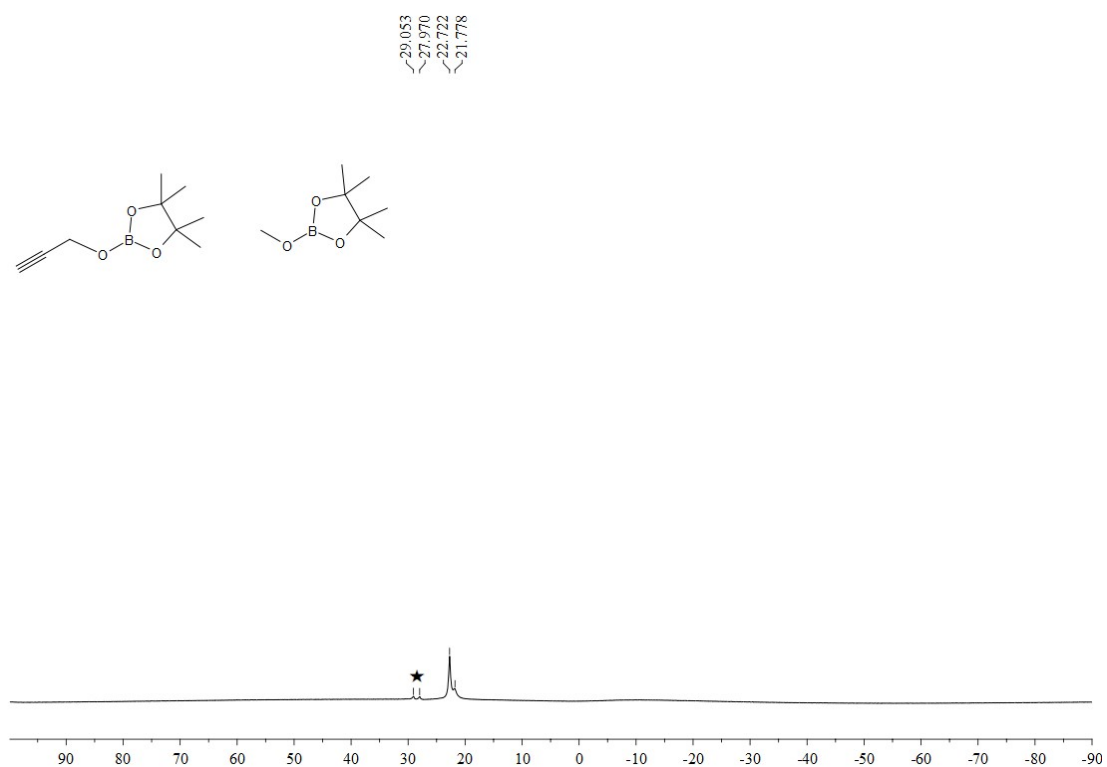

**Figure S99.** <sup>11</sup>B NMR spectrum (128 MHz, C<sub>6</sub>D<sub>6</sub>) of HCCCH<sub>2</sub>OBpin/MeOBpin (★ represents HBpin).

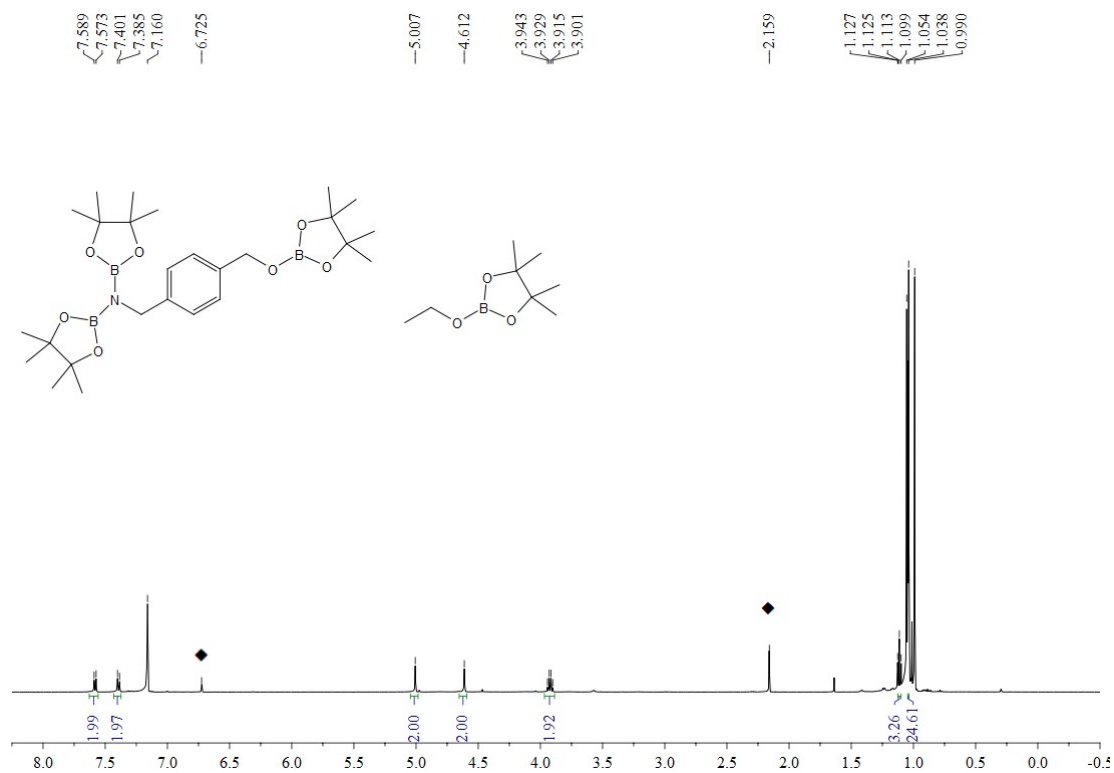

**Figure S100.**  $^1\text{H}$  NMR spectrum (500 MHz,  $\text{C}_6\text{D}_6$ ) of  $(\text{pinB})_2\text{NCH}_2\text{C}_6\text{H}_4\text{CH}_2\text{OBpin}/\text{EtOBpin}$  (◆ represents mesitylene)

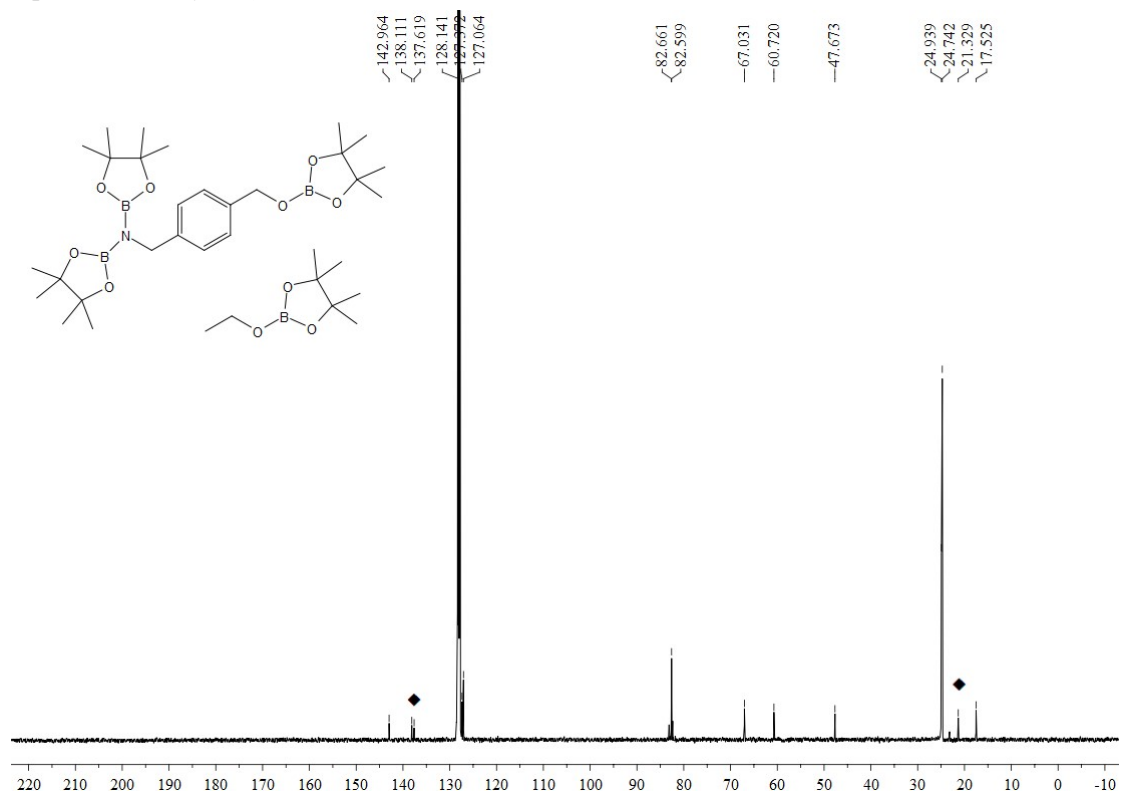

**Figure S101.**  $^{13}\text{C}$  NMR spectrum (125 MHz,  $\text{C}_6\text{D}_6$ ) of  $(\text{pinB})_2\text{NCH}_2\text{C}_6\text{H}_4\text{CH}_2\text{OBpin}/\text{EtOBpin}$  (◆ represents mesitylene).

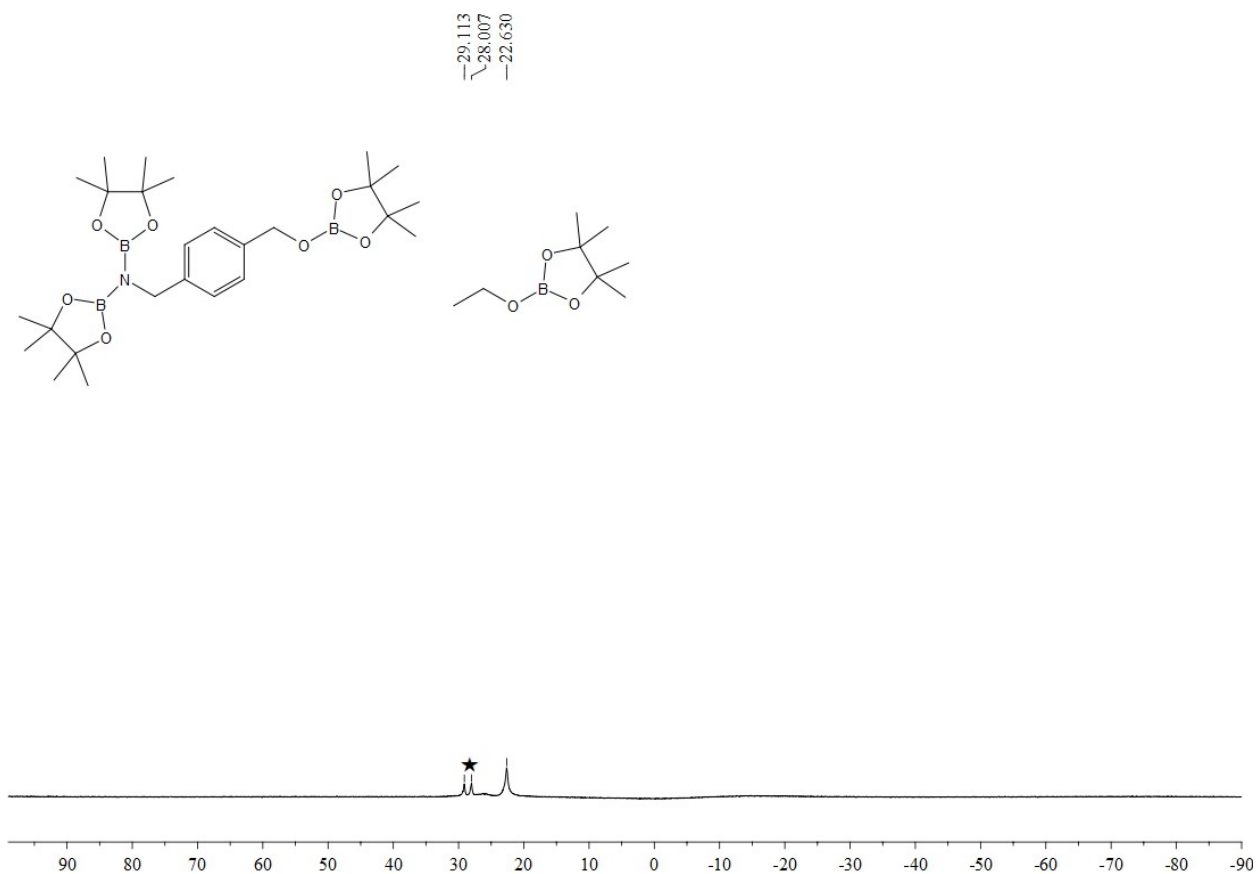

**Figure S102.**  $^{11}\text{B}$  NMR spectrum (128 MHz,  $\text{C}_6\text{D}_6$ ) of  $(\text{pinB})_2\text{NCH}_2\text{C}_6\text{H}_4\text{CH}_2\text{OBpin}/\text{EtOBpin}$  (★ represents HBpin).

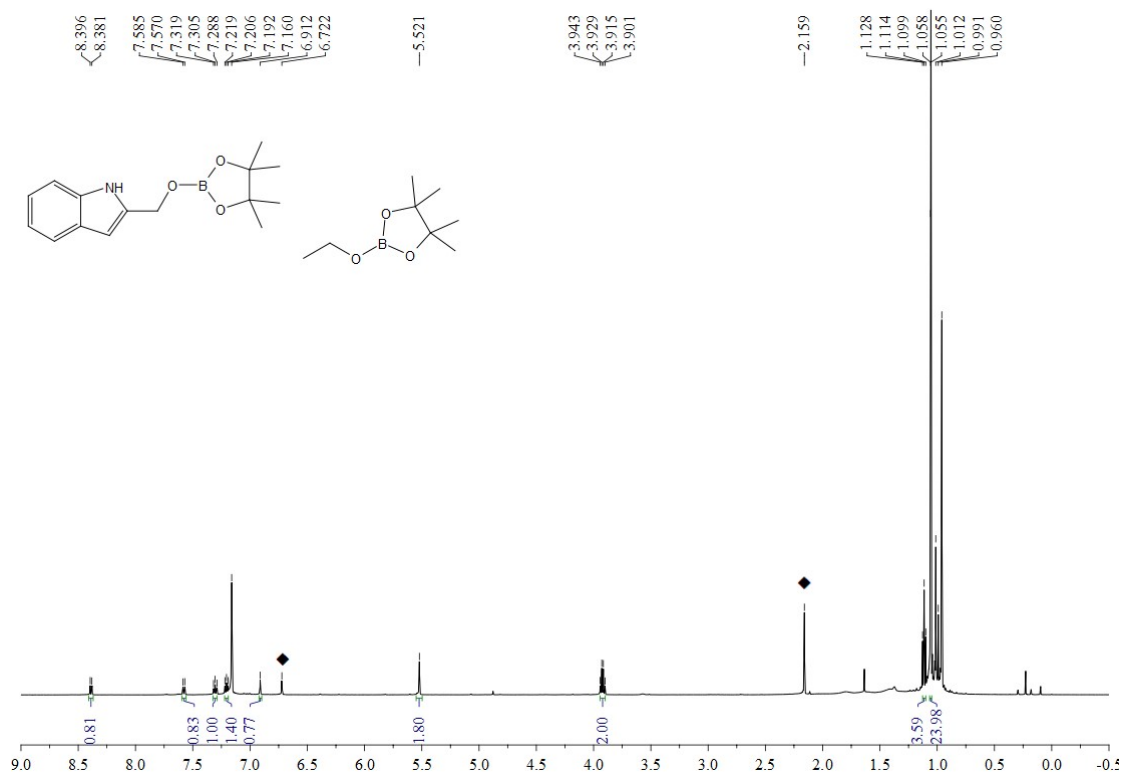

**Figure S103.**  $^1\text{H}$  NMR spectrum (500 MHz,  $\text{C}_6\text{D}_6$ ) of 2-indolyl- $\text{CH}_2\text{OBpin}/\text{EtOBpin}$ . (◆)

represents mesitylene).

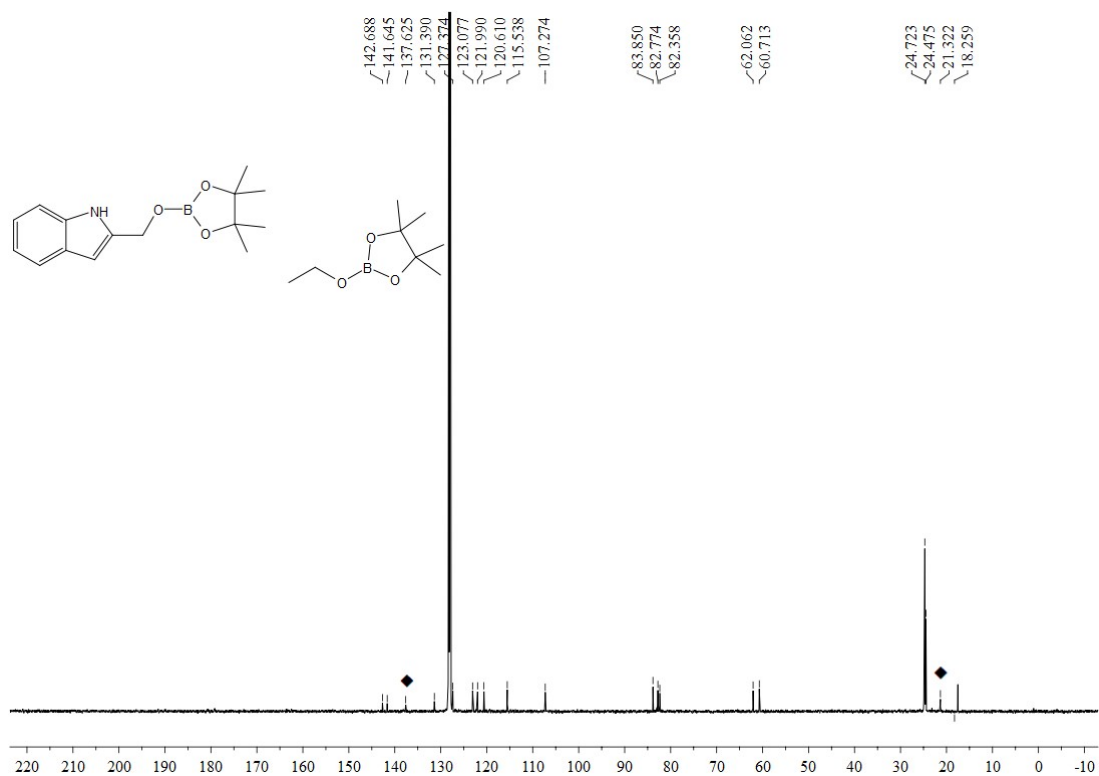

**Figure S104.**  $^{13}\text{C}$  NMR spectrum (125 MHz,  $\text{C}_6\text{D}_6$ ) of 2-indolyl- $\text{CH}_2\text{OBpin/EtOBpin}$ . (◆ represents mesitylene).

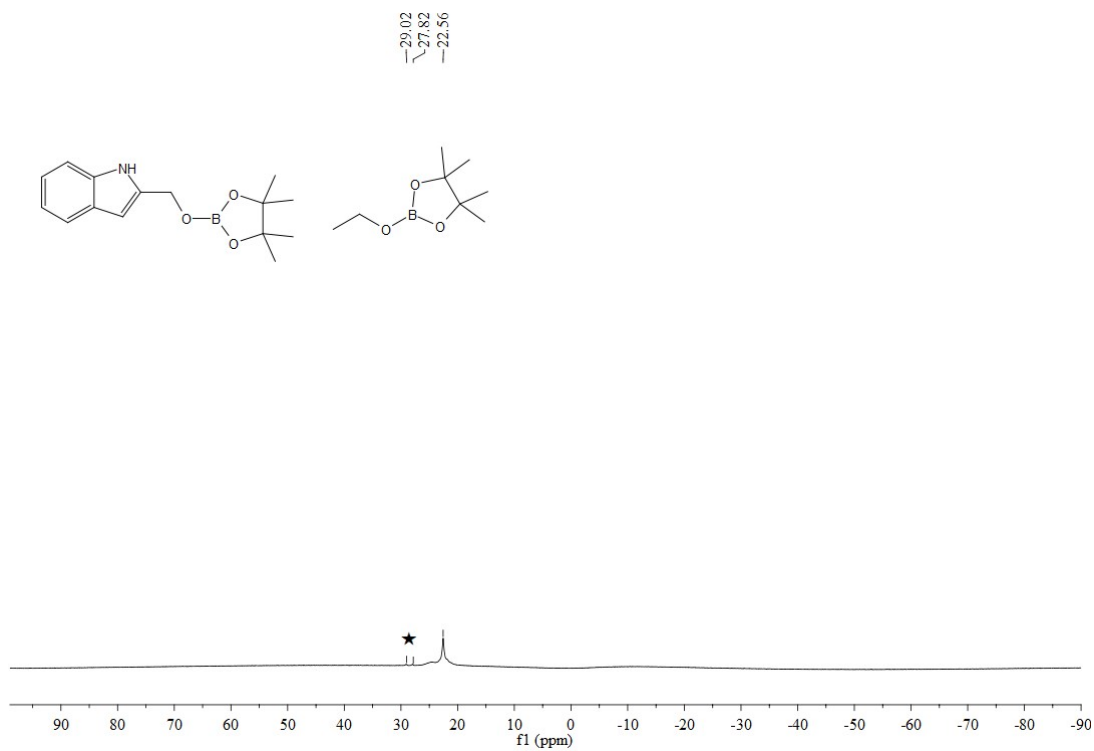

**Figure S105.**  $^{11}\text{B}$  NMR spectrum (128 MHz,  $\text{C}_6\text{D}_6$ ) of 2-indolyl- $\text{CH}_2\text{OBpin/EtOBpin}$ . (★ represents HBpin).

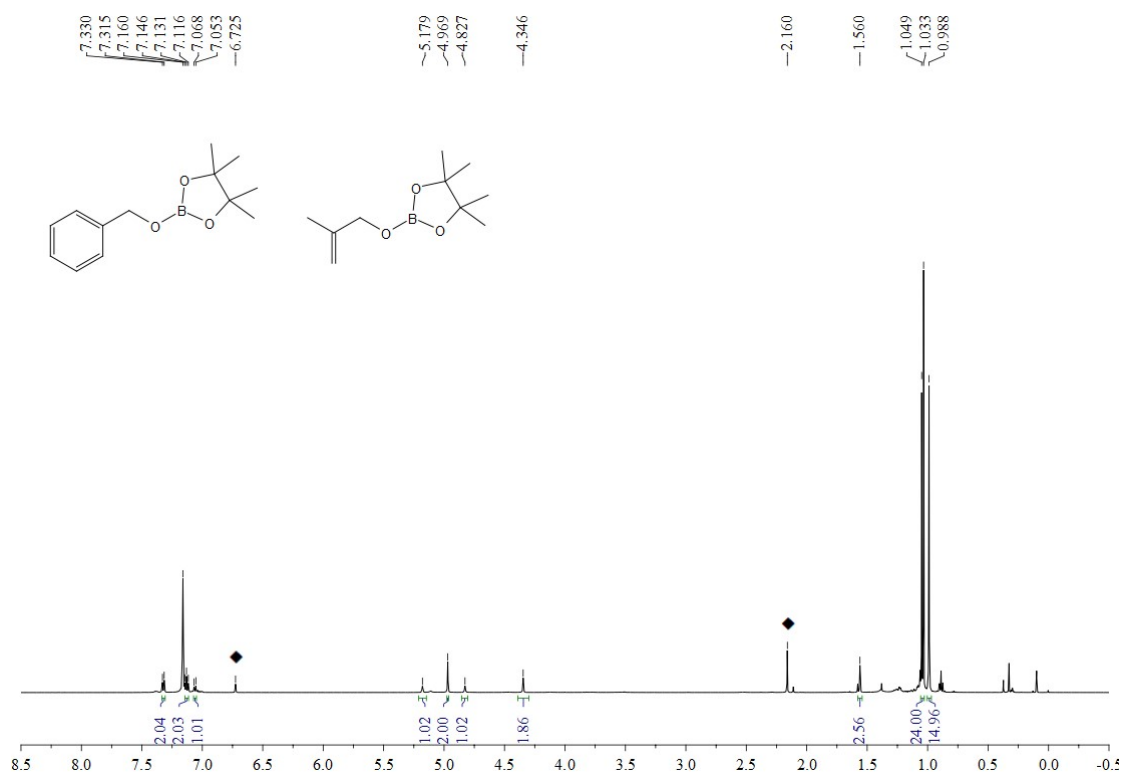

**Figure S106.**  $^1\text{H}$  NMR spectrum (500 MHz,  $\text{C}_6\text{D}_6$ ) of  $\text{CH}=\text{MeCH}_2\text{OBpin}/\text{PhCH}_2\text{OBpin}$  (◆ represents mesitylene)

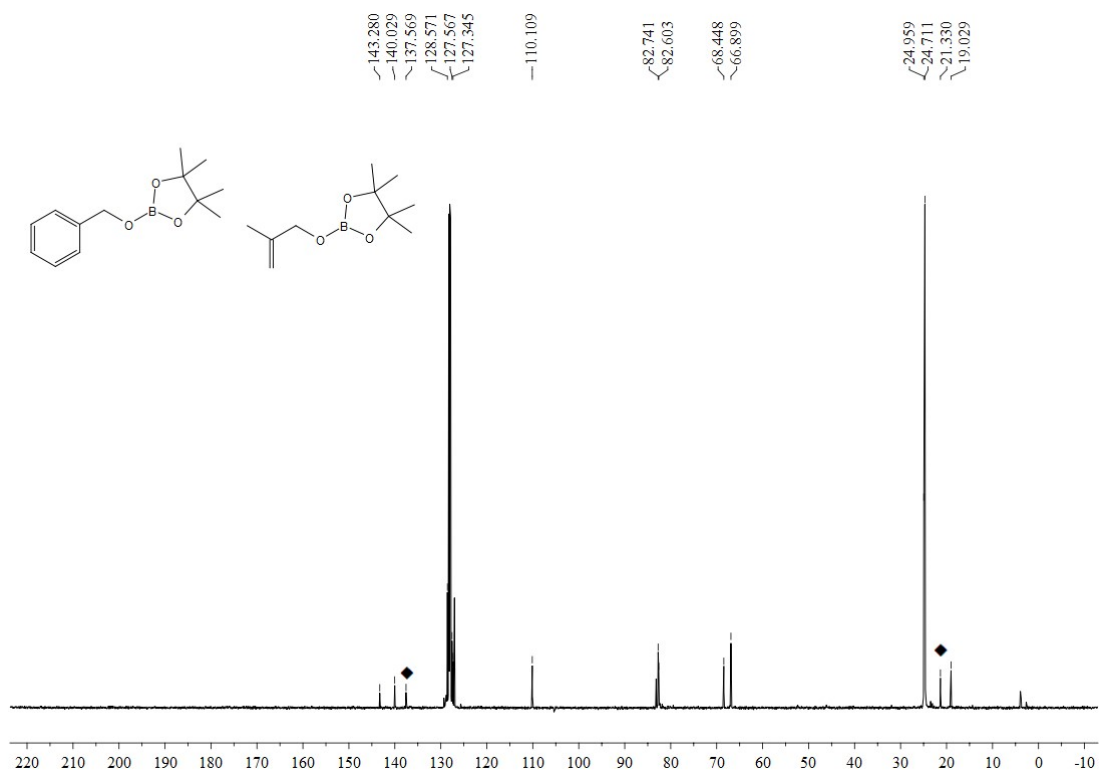

**Figure S107.**  $^{13}\text{C}$  NMR spectrum (125 MHz,  $\text{C}_6\text{D}_6$ ) of  $\text{CH}=\text{MeCH}_2\text{OBpin}/\text{PhCH}_2\text{OBpin}$  (◆ represents mesitylene).

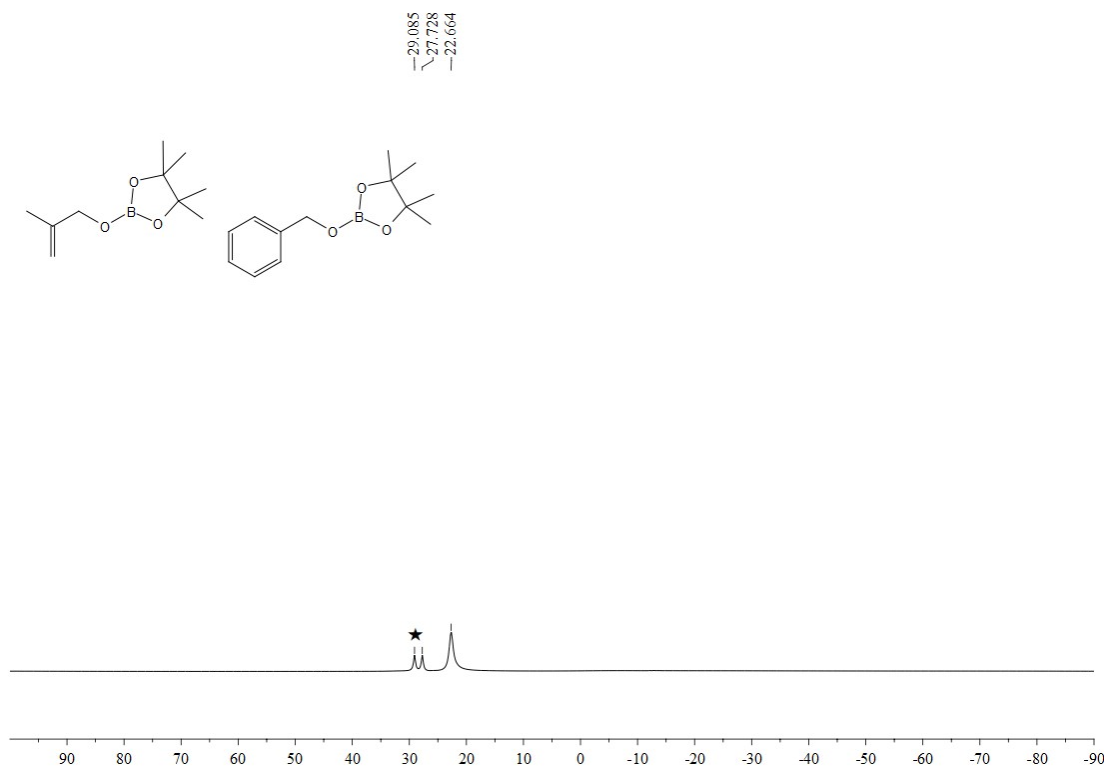

**Figure S108.**  $^{11}\text{B}$  NMR spectrum (128 MHz,  $\text{C}_6\text{D}_6$ ) of  $\text{CH}=\text{CMeCH}_2\text{OBpin}/\text{PhCH}_2\text{OBpin}$  (★ represents HBpin).

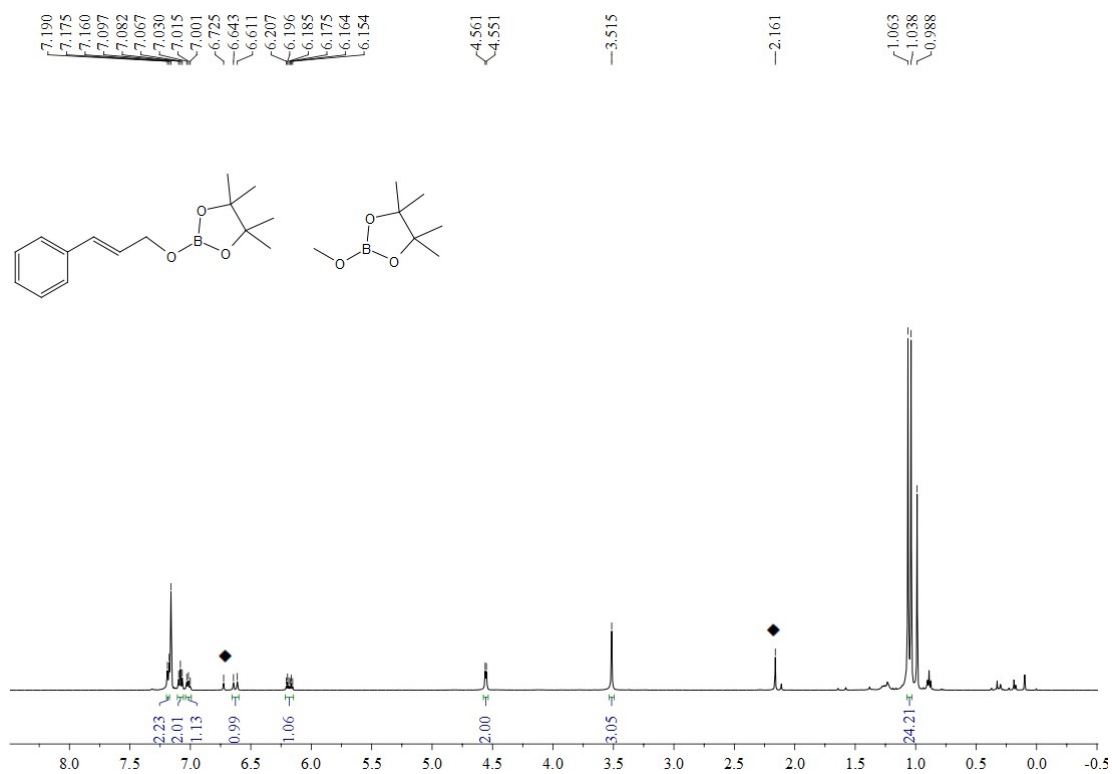

**Figure S109.**  $^1\text{H}$  NMR spectrum (500 MHz,  $\text{C}_6\text{D}_6$ ) of  $\text{PhC}=\text{CHCH}_2\text{OBpin}/\text{MeOBpin}$  (◆ represents mesitylene)



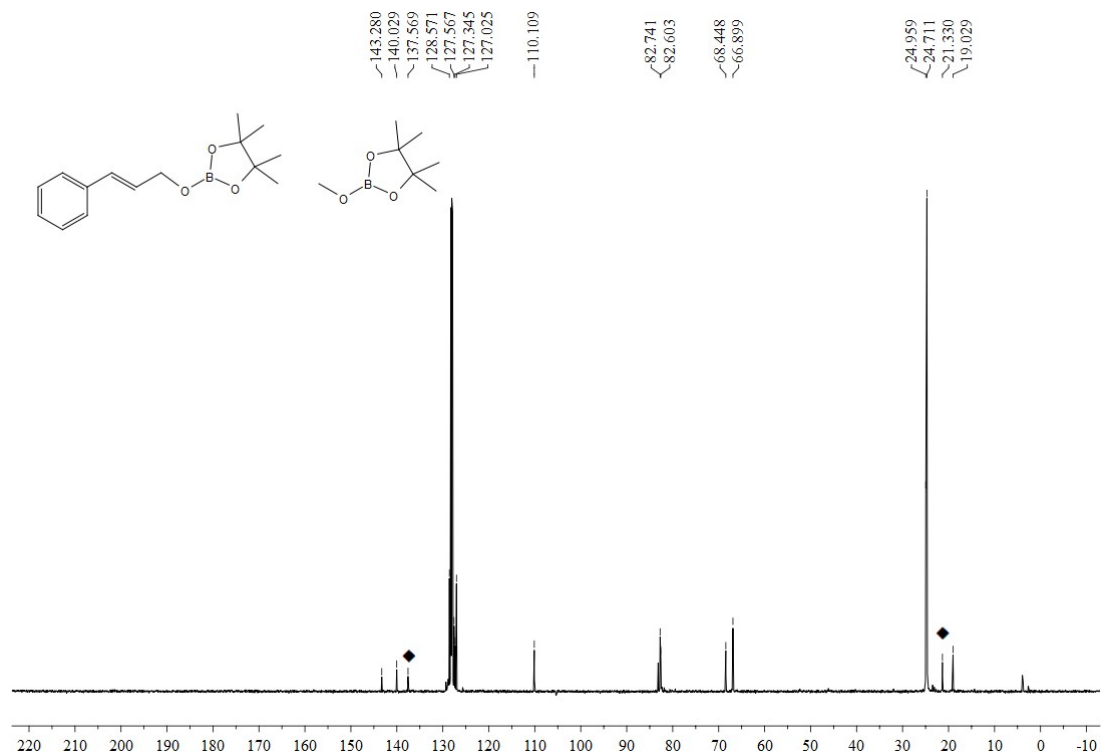

**Figure S200.**  $^{13}\text{C}$  NMR spectrum (125 MHz,  $\text{C}_6\text{D}_6$ ) of  $\text{PhC}=\text{CHCH}_2\text{OBpin/MeOBpin}$  (◆ represents mesitylene).

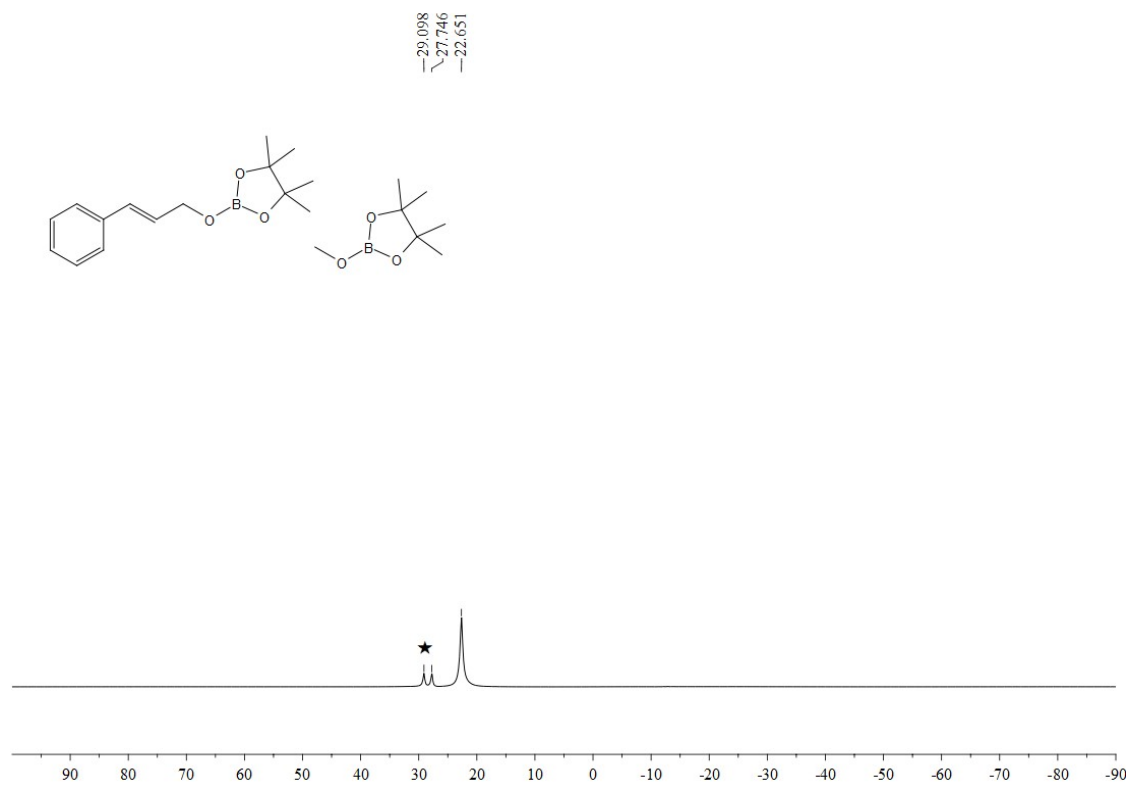

**Figure S201.**  $^{11}\text{B}$  NMR spectrum (128 MHz,  $\text{C}_6\text{D}_6$ ) of  $\text{PhC}=\text{CHCH}_2\text{OBpin/MeOBpin}$  (★ represents HBpin).

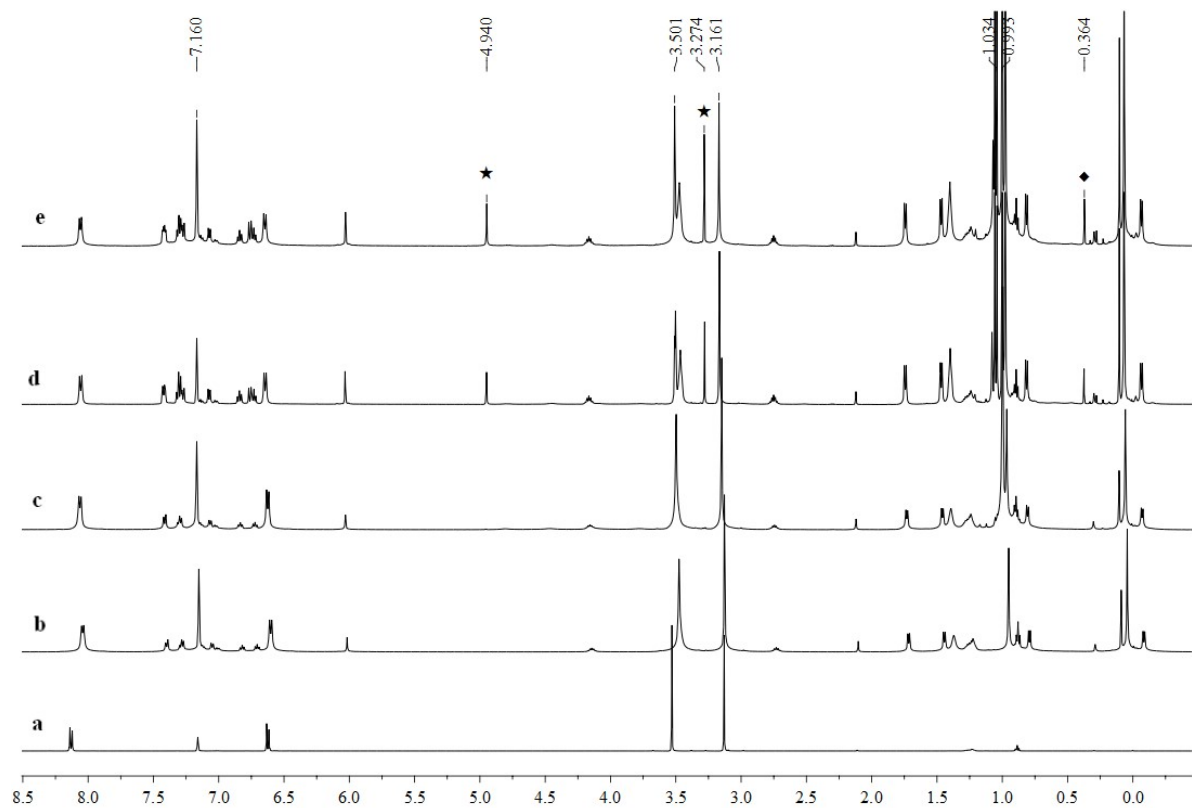

**Figure S202.**  $^1\text{H}$  NMR stack spectra plot of stoichiometric reaction in  $\text{C}_6\text{D}_6$ . (a) 4-MeOPhCOOMe, (b) **1a** + 4-MeOPhCOOMe (1:3), (c) 4-MeOPhCOOMe + **1a** + HBpin (1:3:3), (d) 4-MeOPhCOOMe + **1a** + HBpin (1:3:3 at 80 °C for 2.0 h), (e) 4-MeOPhCOOMe + **1a** + HBpin (1:3:3 at 80 °C for 3.5 h, ★ = 4-MeOPh $\text{CH}_2\text{OBpin}/\text{CH}_3\text{OBpin}$ ), ◆ =  $[(\text{CH}_3)_3\text{Si}]_2\text{N-Bpin}$ ).

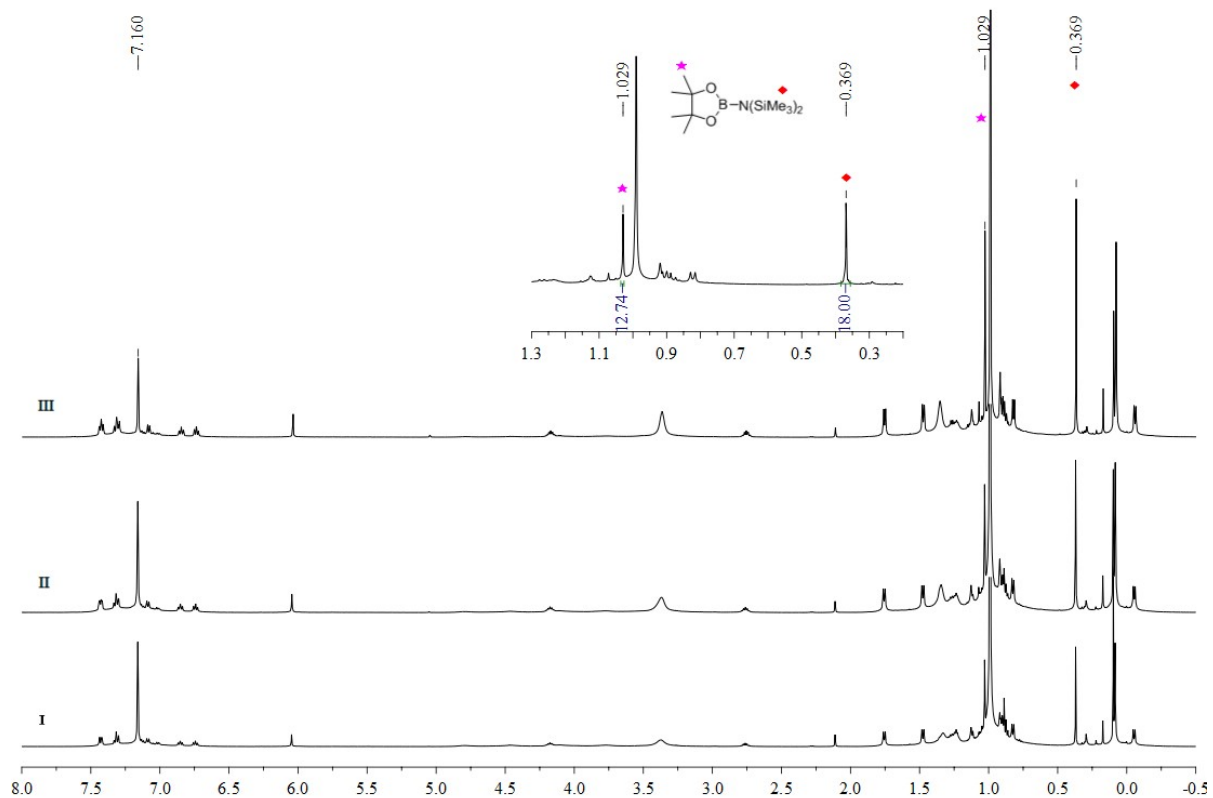

**Figure S203.**  $^1\text{H}$  NMR spectrum (500 MHz,  $\text{C}_6\text{D}_6$ ) of complex **1a** with HBpin (**I**: **1a** + 6 HBpin at 80 °C for 1.5 h; **II**: 4 h, **III**: 20 h).

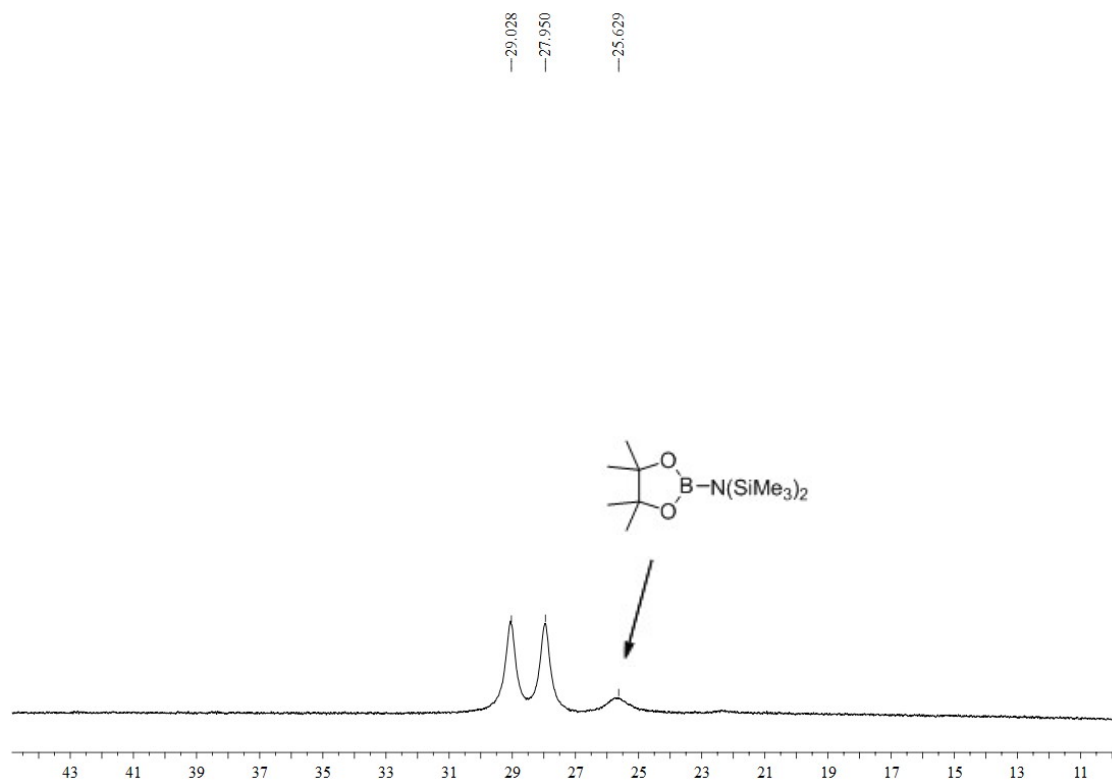

**Figure S204.**  $^{11}\text{B}$  NMR spectrum (128 MHz,  $\text{C}_6\text{D}_6$ ) of complex **1a** with HBpin (1:6) at 80 °C for 20 h.
